# Supplementary material for: Using xenon difluoride and 2 Li[Al{OC(CF3)3}4] as an oxidant: from organoxenonium intermediates to (fluoro-)biphenyl radical cations
Source: Royal Society of Chemistry journal article supplement (doi:10.1039/d6sc01402j), 2026-05-05
Supplement: d6sc01402j1.pdf [file d6sc01402j1.pdf]

## Electronic Supplementary Information

### Using Xenon Difluoride and 2 Li[Al{OC(CF<sub>3</sub>)<sub>3</sub>}<sub>4</sub>] as an Oxidant: From Organoxenonium Intermediates to (Fluoro-)Biphenyl Radical Cations

Konstantin Kloiber,<sup>a)</sup> Tim Heinzmann,<sup>a)</sup> Benoît Lacombe,<sup>a)</sup> Philipp Thielert,<sup>b,c)</sup> Malte Sellin,<sup>a)</sup> Tim Schwandt,<sup>a)</sup> Sabine Richert,<sup>b,c)</sup> Stefan Weber<sup>b)</sup> and Ingo Krossing<sup>a)\*</sup>

<sup>a)</sup> M.Sc. Chem. Konstantin Kloiber, M.Sc. Chem. Tim Heinzmann, B.Sc. Chem. Benoît Lacombe, and Prof. Dr. Ingo Krossing, Institute of Inorganic and Analytical Chemistry and Freiburg Materials Research Center (FMF), University of Freiburg, Albertstr. 21, 79104 Freiburg, Germany.

<sup>b)</sup> M.Sc. Chem. Philipp Thielert, Prof. Dr. Sabine Richert and Prof. Dr. Stefan Weber, Institute of Physical Chemistry, University of Freiburg, Albertstr. 21, 79104 Freiburg, Germany.

<sup>c)</sup> M.Sc. Chem. Philipp Thielert, Prof. Dr. Sabine Richert, Institute of Physical Chemistry II, University of Ulm, Lise-Meitner-Str. 16, 89081 Ulm, Germany.

\* Correspondence to [krossing@uni-freiburg.de](mailto:krossing@uni-freiburg.de).

#### 1. Compounds

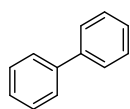

**1**

154.21 g mol<sup>-1</sup>

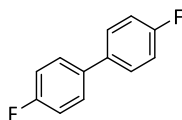

**2**

190.19 g mol<sup>-1</sup>

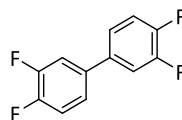

**3**

226.17 g mol<sup>-1</sup>

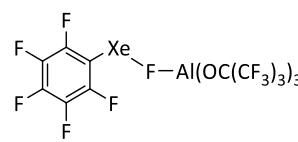

**4**

1049.35 g mol<sup>-1</sup>

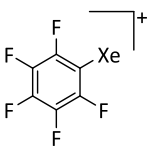

**5**

[F(Al(OC(CF<sub>3</sub>)<sub>3</sub>)<sub>3</sub>)<sub>2</sub>]<sup>-</sup>  
1781.48 g mol<sup>-1</sup>

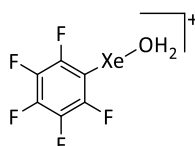

**6**

[Al(OC(CF<sub>3</sub>)<sub>3</sub>)<sub>4</sub>]<sup>-</sup>  
1283.44 g mol<sup>-1</sup>

#### 2. General Remarks

Due to the high oxidation and hydrolysis sensitivity of the reagents, all work was carried out using standard Schlenk technique or in a glove box (MBraun, filled with argon (O<sub>2</sub>/H<sub>2</sub>O < 1 ppm)). All glassware used in reactions were stored overnight in an oven at 130 °C or dried under reduced pressure (10<sup>-3</sup> mbar) by using a heat gun. Some reactions were performed in a special double Schlenk vessel. This vessel consists of two Schlenk tubes connected by a G3/G4 frit and equipped with grease-free PTFE or glass valves (see Figure S 1).

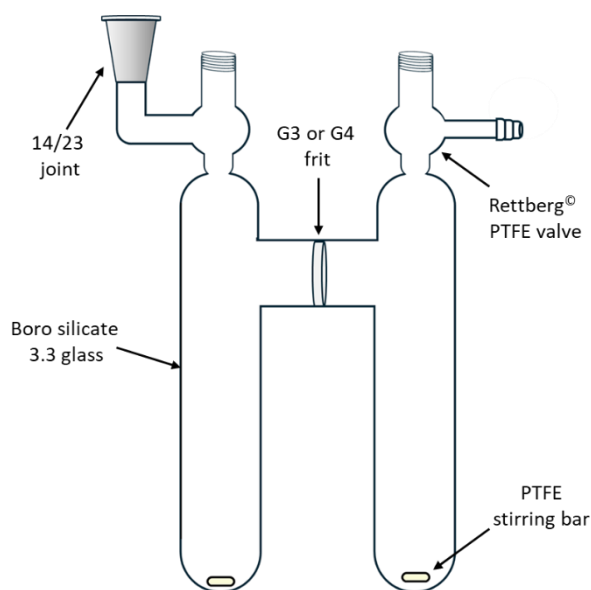

Figure S 1: Sketch of a standard double Schlenk vessel.

$\text{Li}[\text{Al}(\text{OR}^{\text{F}})_4]^1$  and  $\text{Me}_3\text{SiF-Al}(\text{OR}^{\text{F}})_3^2$  were prepared according to literature protocols. The fluorinated benzene derivatives were purchased from Apollo Scientific Ltd and stirred over  $\text{CaH}_2$  for three days. They were then condensed onto activated molecular sieves ( $3 \text{ \AA}$ ). To remove traces of less fluorinated arenes from the more highly fluorinated arenes,  $\text{Ag}[\text{Al}(\text{OR}^{\text{F}})_4]$  was added prior to distillation, as the less fluorinated arenes (FB, 2FB and 3FB) form stable arene complexes with the silver salt. After this purification step, the purified fluorinated benzene derivative was condensed into a new vessel.

$\text{B}(\text{C}_6\text{F}_5)_3$  and  $\text{XeF}_2$  were available from in-house stocks, and their identity and purity were confirmed by NMR spectroscopy.

## 2.1. Single Crystal X-Ray Diffraction

Crystals were obtained by laying the reaction solution with *n*-pentane, slowly evaporation of the solvent in a glove box or by concentrating the reaction solution and storing it at low temperature. Single crystal X-ray diffraction data were collected from shock-cooled single crystals at 100(2) K on a Bruker D8 VENTURE three-circle diffractometer with a microfocus sealed X-ray tube using mirror optics as monochromator and a Bruker PHOTON III detector. All crystals were selected under perfluoropolyether oil (PFPE, JC 1800), mounted on 0.1 to 0.2 mm diameter CryoLoops quench-cooled using an *Oxford Cryostream 800* open flow  $\text{N}_2$  cooling device.<sup>3</sup> Data were collected at 100 K using monochromated  $\text{Mo K}\alpha$  radiation ( $\lambda = 0.71073 \text{ \AA}$ ).

All data were integrated with SAINT and a multi-scan absorption correction using SADABS was applied.<sup>4,5</sup> The structure was solved by direct methods using SHELXT and refined by full-matrix least-squares methods against  $F^2$  by SHELXL-2019/1<sup>6</sup> employing shelXle.<sup>7</sup> All non-hydrogen atoms were refined with anisotropic displacement parameters. The hydrogen atoms were refined isotropically on calculated positions using a riding model with their  $U_{\text{iso}}$  values constrained to 1.5 times the  $U_{\text{eq}}$  of their pivot atoms for terminal  $sp^3$  carbon atoms and 1.2

times for all other carbon atoms. Disordered moieties were refined using bond lengths restraints and displacement parameter restraints. Some parts of the disorder model were introduced by the program DSR.<sup>8</sup> Graphical representations were prepared using Olex2-1.5.<sup>9</sup>

Crystallographic data for the structure reported in this paper have been deposited at the Cambridge Crystallographic Data Centre.<sup>10</sup> CCDC contains the supplementary crystallographic data for this paper. Copies of the data can be obtained free of charge from the Cambridge Crystallographic Data Centre via [www.ccdc.cam.ac.uk/structures](http://www.ccdc.cam.ac.uk/structures). This report and the CIF file were generated using FinalCif.<sup>11</sup>

## 2.2. Hirshfeld Surface Plot

The Hirshfeld surface plots of  $[\text{C}_6\text{F}_5\text{Xe}][\text{F}(\text{Al}(\text{OR}^{\text{F}})_3)_2]$  and  $[\text{C}_6\text{F}_5\text{Xe-F-Al}(\text{OR}^{\text{F}})_3]$  were generated by using the free software CrystalExplorer.<sup>12</sup>

## 2.3. NMR Spectroscopy

$^1\text{H}$ -,  $^{19}\text{F}$ -,  $^{27}\text{Al}$ -,  $^{129}\text{Xe}$ - and 2D-NMR spectra were collected on an *Avance DPX 200* (200 MHz), *Avance III HD* (300 MHz) and *Avance II+ 400* (400 MHz) NMR spectrometers from Bruker. NMR spectra were analyzed using *Bruker TopSpin 4.1.4*. Chemical shifts in  $^1\text{H}$ -NMR spectra are referenced to  $\text{SiMe}_4$ .  $^1\text{H}$ -NMR spectra were also calibrated using the solvent signal as an internal reference. Chemical shifts for FB ( $^1\text{H}$ :  $\delta = 6.88$  ppm), 2FB ( $^1\text{H}$ :  $\delta = 6.96$  ppm), 3FB ( $^1\text{H}$ :  $\delta = 6.86$  ppm) and 5FB ( $^1\text{H}$ :  $\delta = 7.01$  ppm) were determined experimentally by adding  $\text{SiMe}_4$  to the aromatic solvent. In FB, one of the two most intense signals of the downfield multiplet appears at  $\delta = 6.88$  ppm; in 2FB, the most intense signal appears at  $\delta = 6.96$  ppm; in 3FB, one of the two most intense signals of the downfield multiplet appears at  $\delta = 6.86$  ppm; and in 5FB, one of the two most intense signals of the downfield multiplet appears at  $\delta = 7.01$  ppm, with the  $\text{SiMe}_4$  signal referenced at 0.00 ppm (Figure S 2 – 5).

Heteroatomic spectra were calibrated according to the IUPAC  $\chi$ -table.<sup>13</sup>  $^{19}\text{F}$  chemical shifts were given with respect to  $\text{CFCl}_3$ ,  $^{27}\text{Al}$  chemical shifts with respect to 1.1 M  $\text{Al}(\text{NO}_3)_3$  in  $\text{D}_2\text{O}$  and  $^{129}\text{Xe}$  chemical shifts with respect to  $\text{XeOF}_4$  (neat liquid).

The  $^{19}\text{F}$  and  $^{27}\text{Al}$  NMR signals of the  $[\text{Al}(\text{OR}^{\text{F}})_4]^-$  anion appear at  $-75$  ppm and 35 ppm, respectively. The broad resonance at ca. 60 ppm in the  $^{27}\text{Al}$  NMR spectra is caused by the probe head.

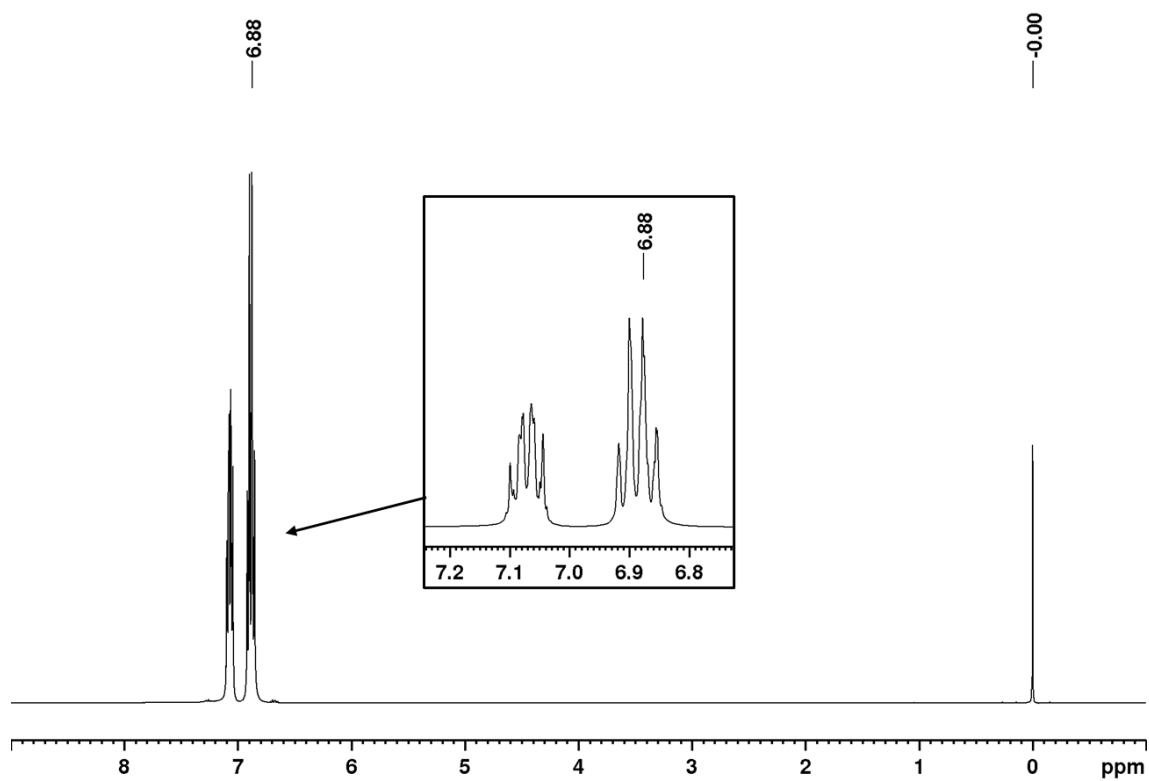

Figure S 2:  $^1\text{H}$  NMR spectrum of FB with  $\text{SiMe}_4$  as internal reference (400.17 MHz, FB, 298 K).

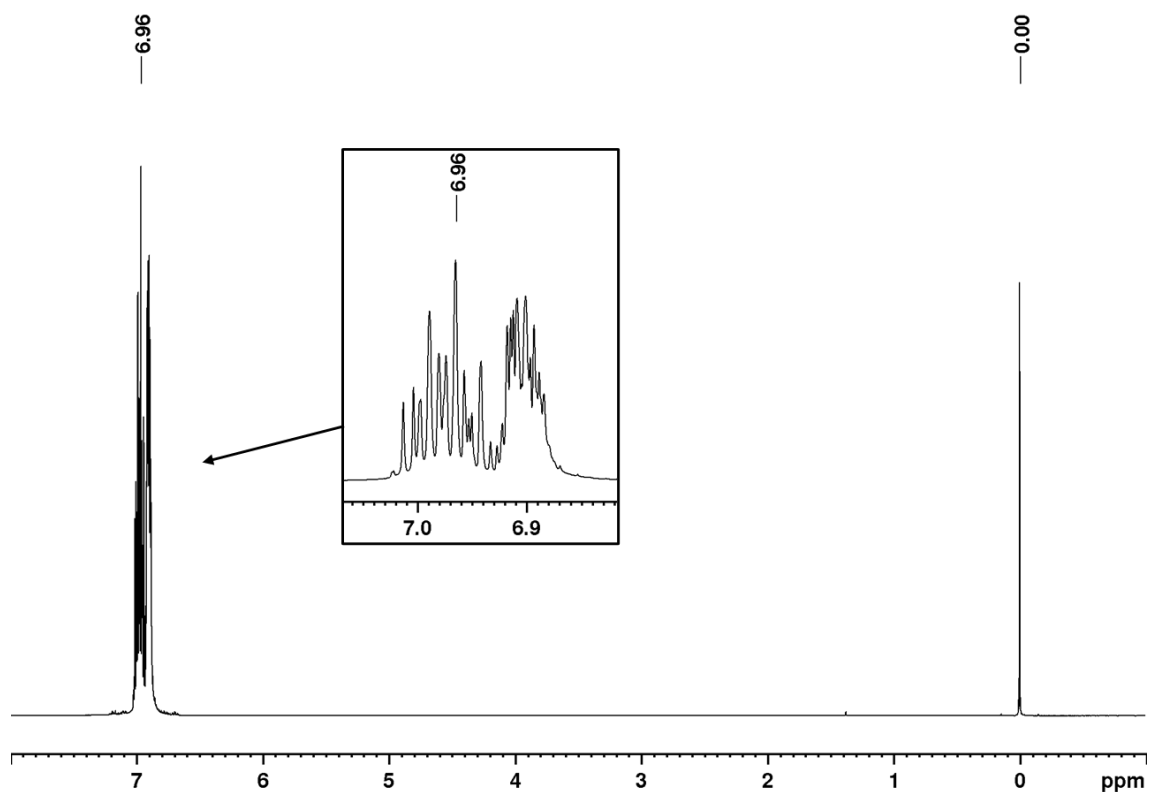

Figure S 3:  $^1\text{H}$  NMR spectrum of 2FB with  $\text{SiMe}_4$  as internal reference (400.17 MHz, 2FB, 298 K).

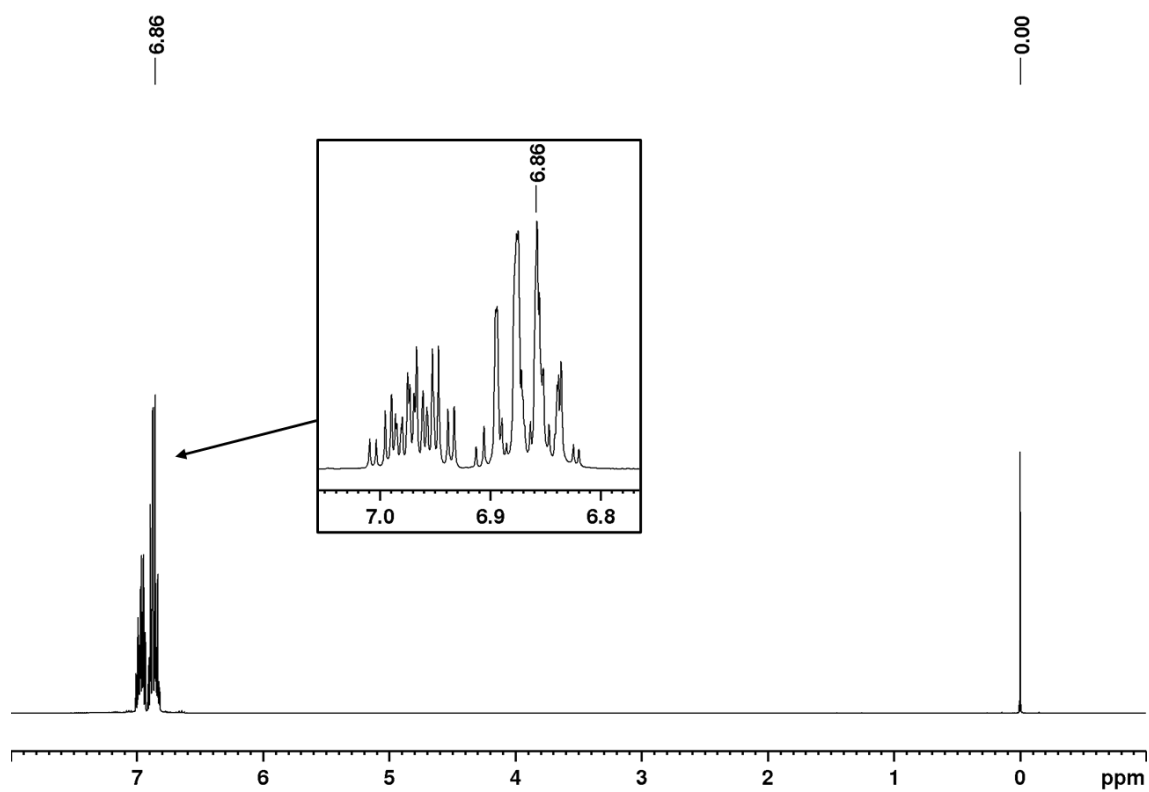

Figure S 4:  $^1\text{H}$  NMR spectrum of 3FB with  $\text{SiMe}_4$  as internal reference (400.17 MHz, 3FB, 298 K).

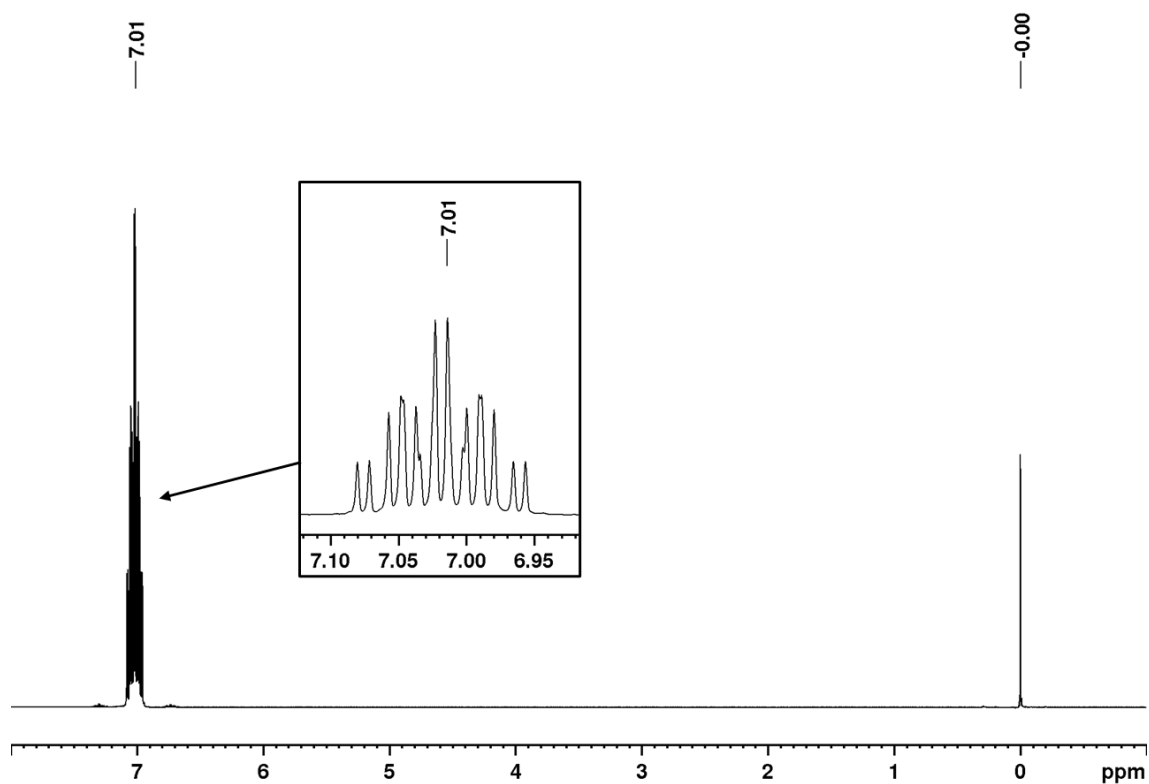

Figure S 5:  $^1\text{H}$  NMR spectrum of 5FB with  $\text{SiMe}_4$  as internal reference (400.17 MHz, 5FB, 298 K).

## 2.4. EPR Spectroscopy

Continuous wave (cw) EPR spectra of the reaction solutions obtained from  $\text{XeF}_2/2\text{Li}[\text{Al}(\text{OR}^{\text{F}})_4]$  with benzene, fluorobenzene or 1,2-difluorobenzene, containing the radical cations  $[\mathbf{1}]^{+\bullet}$ ,  $[\mathbf{2}]^{+\bullet}$  and  $[\mathbf{3}]^{+\bullet}$  were recorded at the X-band (9.75 GHz) on a Bruker EMXnano benchtop EPR spectrometer at room temperature. The modulation frequency was set to 100 kHz and the modulation amplitude to 0.1 mT ( $[\mathbf{1}]^{+\bullet}$ ), 0.03 mT ( $[\mathbf{2}]^{+\bullet}$ ) or 0.2 mT ( $[\mathbf{2}]^{+\bullet}$  and  $[\mathbf{3}]^{+\bullet}$ ) at a microwave power of 1.000 mW (20 dB,  $[\mathbf{1}]^{+\bullet}$ ), 0.2512 mW (26 dB,  $[\mathbf{2}]^{+\bullet}$ ) or 1.000 mW (20 dB,  $[\mathbf{3}]^{+\bullet}$ ). After data acquisition, the spectra were baseline-corrected, frequency-corrected to 9.75 GHz and field-corrected using a carbon fiber standard with  $g = 2.002644$ .<sup>14</sup> The numerical simulation and fitting of the experimental spectrum was performed using EasySpin<sup>15</sup> functions `garlic` and `esfit` in MATLAB.

## 2.5. IR Spectroscopy

FT-IR spectra were recorded on a *FT-IR Bruker Alpha*, equipped with a *Quick Snap Platinum ATR* (diamond or ZnSe crystal) unit inside a glove box under an atmosphere of nitrogen at rt. The spectra were recorded with a resolution of  $2 \text{ cm}^{-1}$  and 64 scans. For measurements and data processing, the software *OPUS 7.5* (Bruker Optic GmbH) was employed. All spectra were ATR corrected, and a base line correction (5 cycles) were employed. By setting the most intense peak to 100 %, the other IR bands were given the following intensity assignment: very weak (vw) < 20 %, weak (w) < 40 %; medium (m) < 60 %, strong (s) < 80 % and very strong (vs) for  $\geq 80$  %.

## 2.6. Quantum Chemical Calculations

Geometry optimizations were performed for standard conditions ( $T = 298 \text{ K}$  and  $p = 1.00 \text{ atm}$ ) with ORCA 5.0<sup>16</sup> using the cost-efficient r2SCAN-3c<sup>17</sup> density functional and the def2-mTZVPP<sup>17</sup> basis set. These calculations employed geometric counterpoise correction (gCP)<sup>18</sup> and the atom-pairwise D4 dispersion correction<sup>19,20</sup>, which utilizes tight-binding partial charges.

The Gibbs free energy can be calculated using Equation S1.

$$G^0 = H^0 - T \cdot S^0 \quad (\text{S } 1)$$

$$H^0 = E_{\text{el}} + E_{\text{vrt}} + R \cdot T \quad (\text{S } 2)$$

$$S = k_B N \left[ \ln \left( \frac{V}{N \Lambda^3} \right) + \frac{5}{2} \right] \quad (\text{S } 3)$$

$$\Lambda = \frac{h}{\sqrt{2\pi m k_B T}}$$

For atoms in the gas phase, the ORCA output does not provide the Gibbs free energy  $G^0$  directly. In these cases,  $G^0$  was calculated using Equations S1 to S3. In Equation S 2,  $E_{el}$  represents the electronic energy, corresponding to the final single-point energy reported in the ORCA output. The term  $E_{vrt}$  is the sum of the translation, rotation and vibrational energies including zero-point energy. Single atoms contribute only translation energy, resulting in  $E_{vrt} = \frac{3}{2}RT$ . Equation S 3 represents the Sackur-Tetrode Equation<sup>21</sup>, which contains Planck's constant  $h$ , Avogadro's number  $N$ , the volume  $V$  and the temperature  $T$ .

### 3. Stability of XeF<sub>2</sub> in 5FB and MeCN

#### 3.1. XeF<sub>2</sub> in 5FB

XeF<sub>2</sub> (25.5 mg, 151  $\mu$ mol) was dissolved in 5FB at room temperature. The solution was directly analyzed by NMR spectroscopy.

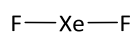

#### NMR

<sup>19</sup>F NMR [282.45 MHz, 5FB, 298 K]:  $\delta = -179.5$  (s, 2 F, Xe–F) ppm.

<sup>129</sup>Xe NMR [83.48 MHz, 5FB, 298 K, calibrated to XeOF<sub>4</sub>]:  $\delta = -1933.9$  (t, 1 Xe, Xe, <sup>1</sup> $J_{\text{Xe,F}} = 5634$  Hz) ppm.

XeF<sub>2</sub> is initially stable in 5FB at room temperature for about one hour. After that time, a second XeF<sub>2</sub> resonance appears in the <sup>19</sup>F NMR spectrum very close to the first, suggesting that XeF<sub>2</sub> begins to experience two chemical environments, likely due to weak interactions or partial complex formation with the solvent. By the following day, XeF<sub>2</sub> signal disappears completely, and multiple new fluorine resonances are observed (see <sup>19</sup>F NMR spectra). Additionally, SiF<sub>4</sub> is detected at  $-1246$  ppm in the <sup>19</sup>F NMR, which is a typical reaction of XeF<sub>2</sub> with silicate glass. These observations demonstrate that XeF<sub>2</sub> is stable for 2 h at room temperature in 5FB.

#### 3.2. XeF<sub>2</sub> in Acetonitrile

XeF<sub>2</sub> (25.5 mg, 151  $\mu$ mol) was dissolved in MeCN at room temperature. The solution was analyzed directly by NMR spectroscopy.

#### NMR

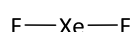

<sup>19</sup>F NMR [376.54 MHz, MeCN, 298 K]:  $\delta = -180.0$  (s, 2 F, <sup>129</sup>Xe–F) ppm.

<sup>129</sup>Xe NMR [111.29 MHz, MeCN, 298 K, calibrated to XeOF<sub>4</sub>]:  $\delta = -1933.9$  (t, 1 Xe, Xe, <sup>1</sup> $J_{\text{Xe,F}} = 5642$  Hz) ppm.

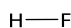

$^1\text{H}$  NMR [400.18 MHz, MeCN, 298 K]:  $\delta = 6.66$  (d, 1 H, **H-F**,  $^1J_{\text{H,F}} = 482.6$  Hz) ppm.

$^{19}\text{F}$  NMR [376.54 MHz, MeCN, 298 K]:  $\delta = -183.7$  (d, 1 F, **H-F**,  $^1J_{\text{H,F}} = 482.6$  Hz) ppm.

$\text{XeF}_2$  shows good stability in acetonitrile for several days under the herein used conditions, which is consistent with previous literature reports.<sup>22</sup> After three days, small amounts of HF could be observed at 6.66 ppm in the  $^1\text{H}$  NMR spectrum and at  $-183.7$  ppm in the  $^{19}\text{F}$  NMR spectrum, likely resulting from reaction with the glass vessel.

## 4. Syntheses

### 4.1. Biphenyl – Reaction of $\text{XeF}_2/2\text{Li}[\text{Al}(\text{OR}^{\text{F}})_4]$ with Benzene

$\text{Li}[\text{Al}\{\text{OC}(\text{CF}_3)_3\}_4]$  (150 mg, 154  $\mu\text{mol}$ ) was dissolved in benzene/2FB (0.5 mL/3.0 mL) and cooled to  $-40$  °C.  $\text{XeF}_2$  (10.1 mg, 77.0  $\mu\text{mol}$ , 0.50 equiv.) was added, whereupon the reaction mixture turned yellow. The mixture was stirred for 3 h and allowed to warm to room temperature. The reaction was quenched by the addition of water (0.5 mL) and stirring under atmospheric conditions. The resulting mixture was extracted with dichloromethane (3 x 3 mL). The combined organic layers were dried over  $\text{Na}_2\text{SO}_4$ , and the solvent was removed under reduced pressure. Purification by column chromatography using *n*-pentane as eluent afforded the title compound (4.21 mg, 27.3  $\mu\text{mol}$ , 35 %\*) as a white solid.

\* The yield was calculated based on the proposed reaction mechanism, according to which one equivalent of  $\text{XeF}_2$  is required for formation of the coupling product and a second equivalent oxidizes the biphenyl (derivative) to the corresponding radical cation.

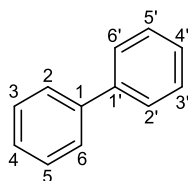

### NMR

$^1\text{H}$  NMR [400.17 MHz,  $\text{CDCl}_3$ , 298 K]:  $\delta = 7.60$  (m, 4 H,  $\text{C}^2\text{H}$ ,  $\text{C}^{2'}\text{H}$ ,  $\text{C}^6\text{H}$ ,  $\text{C}^{6'}\text{H}$ ), 7.44 (m, 4 H,  $\text{C}^3\text{H}$ ,  $\text{C}^{3'}\text{H}$ ,  $\text{C}^5\text{H}$ ,  $\text{C}^{5'}\text{H}$ ), 7.35 (m, 2 H,  $\text{C}^4\text{H}$ ,  $\text{C}^{4'}\text{H}$ ) ppm.

### 4.2. 4,4'-Difluorobiphenyl – Reaction of $\text{XeF}_2/2\text{Li}[\text{Al}(\text{OR}^{\text{F}})_4]$ with Fluorobenzene

$\text{Li}[\text{Al}\{\text{OC}(\text{CF}_3)_3\}_4]$  (150 mg, 154  $\mu\text{mol}$ ) was dissolved in FB (3.0 mL) and cooled to  $-40$  °C.  $\text{XeF}_2$  (10.1 mg, 77.0  $\mu\text{mol}$ , 0.50 equiv.) was added, whereupon the reaction mixture turned blue. The mixture was stirred 3 h and allowed to warm to room temperature. The reaction was quenched by the addition of water (0.5 mL) and stirring under atmospheric conditions. The resulting mixture was extracted with dichloromethane (3 x 3 mL). The

combined organic layers were dried over  $\text{Na}_2\text{SO}_4$ , and the solvent was removed under reduced pressure. Purification by column chromatography using *n*-pentane as eluent afforded the title compound (5.93 mg, 31.2  $\mu\text{mol}$ , 41 %\*) as a white solid.

\* The yield was calculated based on the proposed reaction mechanism, according to which one equivalent of  $\text{XeF}_2$  is required for formation of the coupling product and a second equivalent oxidizes the biphenyl (derivative) to the corresponding radical cation.

### NMR

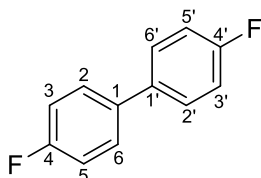

$^1\text{H}$  NMR [400.17 MHz,  $\text{CDCl}_3$ , 298 K]:  $\delta$  = 7.49 (m, 4 H,  $\text{C}^2\text{H}$ ,  $\text{C}^{2'}\text{H}$ ,  $\text{C}^6\text{H}$ ,  $\text{C}^{6'}\text{H}$ ), 7.12 (m, 4 H,  $\text{C}^3\text{H}$ ,  $\text{C}^{3'}\text{H}$ ,  $\text{C}^5\text{H}$ ,  $\text{C}^{5'}\text{H}$ ) ppm.

$^{19}\text{F}$  NMR [376.5 MHz,  $\text{CDCl}_3$ , 298 K]:  $\delta$  = -115.8 (m, 2 F,  $\text{C}^4\text{F}$ ,  $\text{C}^{4'}\text{F}$ ) ppm.

### **4.3. 3,3',4,4'-Tetrafluorobiphenyl – Reaction of $\text{XeF}_2/2\text{Li}[\text{Al}(\text{OR}^{\text{F}})_4]$ with 1,2-Difluorobenzene**

$\text{Li}[\text{Al}\{\text{OC}(\text{CF}_3)_3\}_4]$  (150 mg, 154  $\mu\text{mol}$ ) was dissolved in 2FB (3.0 mL) and cooled to  $-40$  °C.  $\text{XeF}_2$  (10.1 mg, 77.0  $\mu\text{mol}$ , 0.50 equiv.) was added, whereupon the reaction mixture turned blue. The mixture was stirred 3 h and allowed to warm to room temperature. The reaction was quenched by the addition of water (0.5 mL) and stirring under atmospheric conditions. The resulting mixture was extracted with dichloromethane (3 x 3 mL). The combined organic layers were dried over  $\text{Na}_2\text{SO}_4$ , and the solvent was removed under reduced pressure. Purification by column chromatography using *n*-pentane as eluent afforded the title compound (7.51 mg, 33.2  $\mu\text{mol}$ , 43 %\*) as a white solid.

### NMR

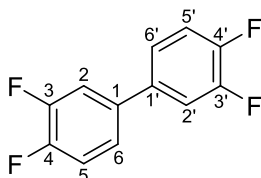

$^1\text{H}$  NMR [300.18 MHz,  $\text{CDCl}_3$ , 298 K]:  $\delta$  = 7.34 (m, 2 H,  $\text{C}^2\text{H}$ ,  $\text{C}^{2'}\text{H}$ ), 7.25 (m, 4 H,  $\text{C}^5\text{H}$ ,  $\text{C}^{5'}\text{H}$ ,  $\text{C}^6\text{H}$ ,  $\text{C}^{6'}\text{H}$ ) ppm.

$^{19}\text{F}$  NMR [282.45 MHz,  $\text{CDCl}_3$ , 298 K]:  $\delta$  = -136.9 (m, 2 F,  $\text{C}^3\text{F}$ ,  $\text{C}^{3'}\text{F}$ ), -139.1 (m, 2 F,  $\text{C}^4\text{F}$ ,  $\text{C}^{4'}\text{F}$ ) ppm.

#### 4.4. Reaction of XeF<sub>2</sub>/2Li[Al(OR<sup>F</sup>)<sub>4</sub>] with 1,2,3-Trifluorobenzene

Li[Al{OC(CF<sub>3</sub>)<sub>3</sub>}<sub>4</sub>] (150 mg, 154 μmol) was dissolved in 3FB/5FB (0.5 mL/2.5 mL) and cooled to – 35 °C. XeF<sub>2</sub> (10.1 mg, 77.0 μmol, 0.50 equiv.) was added, whereupon the reaction mixture turned slowly to orange/brown. The reaction mixture was analyzed by NMR at 235 K and rt. The [2,3,4-C<sub>6</sub>F<sub>3</sub>Xe]<sup>+</sup> cation was observed as one of the minor products.

#### NMR

For clarity, only the xenonium species is discussed in detail. This species was observed as a minor product, while additional signals in the <sup>19</sup>F NMR spectrum indicate the presence of further fluorinated aromatic species.

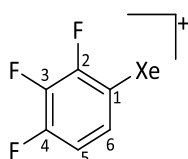

#### [2,3,4-C<sub>6</sub>F<sub>3</sub>Xe]<sup>+</sup> (minor product)

<sup>1</sup>H NMR [400.17 MHz, 3FB/5FB (1:4), 243 K]: δ = 8.67 (m, 1 H, C<sup>6</sup>H), 8.03 (m, 1 H, C<sup>5</sup>H) ppm.

<sup>19</sup>F NMR [376.53 MHz, 3FB/5FB (1:4), 243 K]: δ = –116.6 (m, 1 F, C<sup>2</sup>F), –118.8 (m, 2 F, C<sup>4</sup>F), –143.7 (m, 1 F, C<sup>3</sup>F) ppm.

<sup>129</sup>Xe NMR [111.29 MHz, 3FB/5FB (1:4), 243 K]: δ = –3955.7 (m, 1 Xe, C<sup>1</sup>Xe) ppm.

<sup>1</sup>H NMR [400.17 MHz, 3FB/5FB (1:4), 298 K]: δ = 8.59 (m, 1 H, C<sup>6</sup>H), 7.99 (m, 1 H, C<sup>5</sup>H) ppm.

<sup>19</sup>F NMR [376.53 MHz, 3FB/5FB (1:4), 298 K]: δ = –116.5 (m, 1 F, C<sup>2</sup>F), –118.0 (m, 2 F, C<sup>4</sup>F), –143.0 (m, 1 F, C<sup>3</sup>F) ppm.

<sup>129</sup>Xe NMR [111.29 MHz, 3FB/5FB (1:4), 298 K]: δ = –3962.1 (br, 1 Xe, C<sup>1</sup>Xe) ppm.

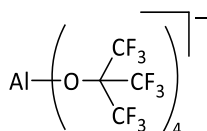

#### [Al{OC(CF<sub>3</sub>)<sub>3</sub>}<sub>4</sub>]<sup>-</sup>

<sup>19</sup>F NMR [376.53 MHz, 3FB/5FB (1:4), 243 K]: δ = –76.5 (s, 36 F, OC-CF<sub>3</sub>) ppm.

<sup>27</sup>Al NMR [104.27 MHz, 3FB/5FB (1:4), 243 K]: no signal observed.

<sup>19</sup>F NMR [376.53 MHz, 3FB/5FB (1:4), 298 K]: δ = –76.2 (s, 36 F, OC-CF<sub>3</sub>) ppm.

$^{27}\text{Al}$  NMR [104.27 MHz, 3FB/5FB (1:4), 298 K]:  $\delta = 38.0$  (br s, 1 Al, Al-O) ppm.

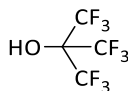

### HOC(CF<sub>3</sub>)<sub>3</sub>

$^1\text{H}$  NMR [400.17 MHz, 3FB/5FB (1:4), 298 K]:  $\delta = 3.66$  (s, 1 H, OH)

$^{19}\text{F}$  NMR [376.53 MHz, 3FB/5FB (1:4), 298 K]:  $\delta = -76.2$  (m, 9 F, OC-CF<sub>3</sub>) ppm.

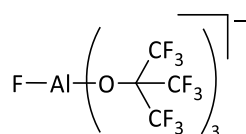

### [FAl{OC(CF<sub>3</sub>)<sub>3</sub>}<sub>3</sub>]<sup>-</sup>

$^{19}\text{F}$  NMR [376.53 MHz, 3FB/5FB (1:4), 298 K]:  $\delta = -76.8$  (s, 27 F, OC-CF<sub>3</sub>) ppm.

$^{27}\text{Al}$  NMR [104.27 MHz, 3FB/5FB (1:4), 298 K]: no signal observed (probably under the bs of [Al{OC(CF<sub>3</sub>)<sub>3</sub>}<sub>4</sub>]<sup>-</sup>).

## **4.5. Reaction of XeF<sub>2</sub>/2Li[Al(OR<sup>F</sup>)<sub>4</sub>] with anthracene<sup>Hal</sup> in 5FB and MeCN**

### 5FB

Li[Al{OC(CF<sub>3</sub>)<sub>3</sub>}<sub>4</sub>] (150 mg, 154  $\mu\text{mol}$ ) and anthracene<sup>Hal</sup> (30.1 mg, 77.0  $\mu\text{mol}$ ) were dissolved in 5FB (2.5 mL) and cooled to  $-35^\circ\text{C}$ . XeF<sub>2</sub> (10.1 mg, 77.0  $\mu\text{mol}$ , 0.50 equiv.) was added and allowed to warm to room temperature, while a color change to deep green took place, consistent with the formation of [anthracene<sup>Hal</sup>]<sup>+•</sup>.<sup>23</sup>

### MeCN

With an analogous procedure in NCMc instead of 5FB no color change to green could be observed, suggesting that formation of [anthracene<sup>Hal</sup>]<sup>+•</sup> did not occur under these conditions.

## **4.6. Reaction of XeF<sub>2</sub>/2Li[Al(OR<sup>F</sup>)<sub>4</sub>] with Ferrocene in MeCN**

Li[Al{OC(CF<sub>3</sub>)<sub>3</sub>}<sub>4</sub>] (150 mg, 154  $\mu\text{mol}$ ) and ferrocene (Fc) (14.3 mg, 77.0  $\mu\text{mol}$ , 0.50 equiv.) were dissolved in acetonitrile (2.5 mL) and cooled to  $-35^\circ\text{C}$ . XeF<sub>2</sub> (10.1 mg, 77.0  $\mu\text{mol}$ , 0.50 equiv.) was added and allowed to warm to room temperature, while a color change to deep blue took place, consistent with the formation of [Fc]<sup>+•</sup>.

Notably, control experiments further showed that Fc can already be oxidized by XeF<sub>2</sub> alone in MeCN, whereas Li[Al(OR<sup>F</sup>)<sub>4</sub>] primarily acts as a metathesis reagent to afford Fc[Al(OR<sup>F</sup>)<sub>4</sub>].

#### 4.7. [C<sub>6</sub>F<sub>5</sub>Xe][FAl{OC(CF<sub>3</sub>)<sub>3</sub>}<sub>3</sub>]

B(C<sub>6</sub>F<sub>5</sub>)<sub>3</sub> (133 mg, 0.260 mmol) and Me<sub>3</sub>SiF-Al{OC(CF<sub>3</sub>)<sub>3</sub>}<sub>3</sub> (214 mg, 0.260 mmol, 1.0 equiv.) were placed separately in two arms of a Y-shaped Schlenk tube. Dichloromethane (DCM, 5.0 mL) was added to B(C<sub>6</sub>F<sub>5</sub>)<sub>3</sub> and the mixture was stirred until complete dissolution. The solution was then cooled to –55 °C for 3 h, during which a colorless solid precipitated. The suspension was then cooled to –78 °C and the mother liquor was carefully decanted. DCM (3.3 mL) was added to solid residue at –78 °C, followed by addition of Me<sub>3</sub>SiF-Al(OR<sup>F</sup>)<sub>3</sub> at the same temperature. The reaction mixture was allowed to warm slowly to rt overnight while stirring, yielding a clear dark-brown solution. The mixture was slowly cooled to –40 °C by storing it in a refrigerator inside a Dewar containing *iso*-propanol. The formed crystals were isolated and characterized by scXRD verified the formation of [C<sub>6</sub>F<sub>5</sub>Xe][FAl(OR<sup>F</sup>)<sub>3</sub>]. The crystals were dissolved in DCM and characterized by NMR spectroscopy. No yield was determined.

#### NMR

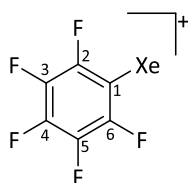

#### [C<sub>6</sub>F<sub>5</sub>Xe]<sup>+</sup>

<sup>19</sup>F NMR [282.45 MHz, CH<sub>2</sub>Cl<sub>2</sub>, 298 K]: δ = –123.2 (m, 2 F, C<sup>2</sup>F, C<sup>6</sup>F), –133.1 (m, 2 F, C<sup>2</sup>F, C<sup>6</sup>F), –147.8 (m, 1 F, C<sup>4</sup>F) ppm.

<sup>129</sup>Xe NMR [83.48 MHz, CH<sub>2</sub>Cl<sub>2</sub>, 298 K]: δ = –3948.1 (m, 1 Xe, C<sup>1</sup>Xe) ppm.

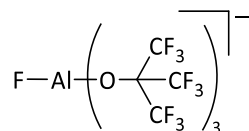

#### [FAl{OC(CF<sub>3</sub>)<sub>3</sub>}<sub>3</sub>]<sup>-</sup>

<sup>19</sup>F NMR [282.45 MHz, CH<sub>2</sub>Cl<sub>2</sub>, 298 K]: δ = –76.0 (br, 27 F, OC-CF<sub>3</sub>), –184.4 (br, 1 F, Al-F) ppm.

<sup>27</sup>Al NMR [78.17 MHz, CH<sub>2</sub>Cl<sub>2</sub>, 298 K]: δ = –39.3 (br, 1 Al, Al-F) ppm.

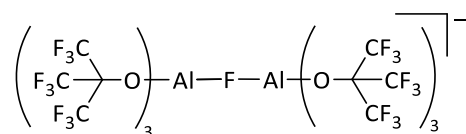

### [F{Al(OC(CF<sub>3</sub>)<sub>3</sub>)<sub>3</sub>]<sub>2</sub>]<sup>-</sup>

<sup>19</sup>F NMR [282.45 MHz, CH<sub>2</sub>Cl<sub>2</sub>, 298 K]: δ = -76.0 (s, 56 F, OC-CF<sub>3</sub>), -184.9 (br, 1 F, Al-F-Al) ppm.

<sup>27</sup>Al NMR [78.17 MHz, CH<sub>2</sub>Cl<sub>2</sub>, 298 K]: δ = no signal observed

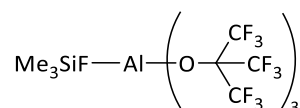

### Me<sub>3</sub>SiF-Al{OC(CF<sub>3</sub>)<sub>3</sub>]<sub>3</sub>

<sup>1</sup>H NMR [300.18 MHz, CH<sub>2</sub>Cl<sub>2</sub>, 298 K]: δ = 0.34 (br, 9 H, Si-CH<sub>3</sub>) ppm.

<sup>19</sup>F NMR [282.45 MHz, CH<sub>2</sub>Cl<sub>2</sub>, 298 K]: δ = -75.9 (s, 56 F, OC-CF<sub>3</sub>), -184.9 (br, 1 F, Si-F-Al) ppm.

<sup>27</sup>Al NMR [78.17 MHz, CH<sub>2</sub>Cl<sub>2</sub>, 298 K]: δ = no signal observed

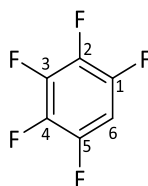

### 5FB

<sup>1</sup>H NMR [300.18 MHz, CH<sub>2</sub>Cl<sub>2</sub>, 298 K]: δ = 6.93 (m, 1 H, C<sup>6</sup>H) ppm.

<sup>19</sup>F NMR [282.45 MHz, CH<sub>2</sub>Cl<sub>2</sub>, 298 K]: δ = -139.2 (m, 2 F, C<sup>1</sup>F, C<sup>5</sup>F), -154.6 (m, 1 F, C<sup>3</sup>F), -162.8 (m, 2 F, C<sup>2</sup>F, C<sup>4</sup>F) ppm.

### scXRD

*Pbca*, *a* = 17.8570(18) Å, *b* = 17.785(4) Å, *c* = 18.0695(17) Å, α = 90°, β = 90°, γ = 90°, *V* = 5738.5(15) Å<sup>3</sup>, *Z* = 8

### **4.8. [C<sub>6</sub>F<sub>5</sub>Xe][F(Al(OR<sup>F</sup>)<sub>3</sub>)<sub>2</sub>]**

B(C<sub>6</sub>F<sub>5</sub>)<sub>3</sub> (267 mg, 0.521 mmol) and Me<sub>3</sub>SiF-Al{OC(CF<sub>3</sub>)<sub>3</sub>]<sub>3</sub> (860 mg, 1.04 mmol, 2.0 equiv.) were placed separately in two arms of a Y-shaped Schlenk tube. Dichloromethane (DCM, 15 mL) was added to B(C<sub>6</sub>F<sub>5</sub>)<sub>3</sub> and the mixture was stirred until complete dissolution. The solution was then cooled to -55 °C, XeF<sub>2</sub> (88.3 mg, 0.521 mmol, 1.0 equiv.) was added and stirred for 3 h, during which a colorless solid precipitated. The suspension was then cooled to -78 °C and the mother liquor was carefully decanted. DCM (3.3 mL) was added to solid residue at -78 °C,

followed by addition of  $\text{Me}_3\text{SiF-Al(OR}^{\text{F}})_3$  at the same temperature. The reaction mixture was stirred for 30 min at  $-78\text{ }^\circ\text{C}$  and rt. The precipitate was filtered off, and the solution was slowly cooled to  $-40\text{ }^\circ\text{C}$  by storing it in a refrigerator inside a Dewar containing *iso*-propanol. The formed colorless crystals were isolated and characterized by scXRD and verified as unreacted  $\text{Me}_3\text{SiF-Al(OR}^{\text{F}})_3$ . Yellow-brown crystals were also present but were not suitable for scXRD. The solvent was removed, and the remaining crystals dried in vacuum. Attempts were made to manually separate the colorless crystals from the colored ones. The resulting crystalline mixture was analyzed by IR and NMR spectroscopy. A portion of the crystals were dissolved in 5FB. By slow evaporation of the solvent in the glove box, crystals were formed suitable for scXRD, which verified them as  $[\text{C}_6\text{F}_5\text{Xe}][\text{F}\{\text{Al(OR}^{\text{F}})_3\}_2]$ . The crystals were dissolved in  $\text{NCCD}_3$  and characterized by NMR spectroscopy. No yield was determined.

## **NMR**

The  $[\text{F(Al(OR}^{\text{F}})_2)]^-$  anion is not stable in the presence of  $\sigma$  donor ligands, consequently, it decomposes in acetonitrile to give the  $[\text{FAl(OR}^{\text{F}})_3]^-$  anion and the stabilized Lewis acid-base adduct  $\text{MeCN-Al(OR}^{\text{F}})_3$ .

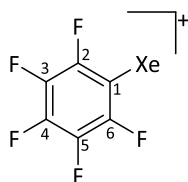

### **$[\text{C}_6\text{F}_5\text{Xe}]^+$**

$^{19}\text{F}$  NMR [376.53 MHz,  $\text{NCCD}_3$ , 298 K]:  $\delta = -126.4$  (m, 2 F,  $\text{C}^2\text{F}$ ,  $\text{C}^6\text{F}$ ),  $-142.6$  (m, 2 F,  $\text{C}^2\text{F}$ ,  $\text{C}^6\text{F}$ ),  $-155.6$  (m, 1 F,  $\text{C}^4\text{F}$ ) ppm.

$^{129}\text{Xe}$  NMR [111.29 MHz,  $\text{NCCD}_3$ , 298 K]:  $\delta = -3796.3$  (m, 1 Xe,  $\text{C}^1\text{Xe}$ ) ppm.

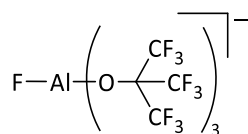

### **$[\text{FAl}\{\text{OC}(\text{CF}_3)_3\}_3]^-$**

$^{19}\text{F}$  NMR [376.53 MHz,  $\text{NCCD}_3$ , 298 K]:  $\delta = -76.2$  (d, 27 F,  $\text{OC-CF}_3$ ,  $^5J_{\text{F,F}} = 1.9$  Hz),  $-185.3$  (br, 1 F,  $\text{Al-F}$ , ) ppm.

$^{27}\text{Al}$  NMR [104.27 MHz,  $\text{NCCD}_3$ , 298 K]:  $\delta = -41.4$  (br, 1 Al,  $\text{Al-F}$ ) ppm.

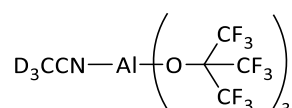

### D<sub>3</sub>CCN-Al{OC(CF<sub>3</sub>)<sub>3</sub>}<sub>3</sub>

<sup>19</sup>F NMR [376.53 MHz, NCCD<sub>3</sub>, 298 K]:  $\delta = -75.6$  (s, 56 F, OC-CF<sub>3</sub>) ppm.

<sup>27</sup>Al NMR [104.27 MHz, NCCD<sub>3</sub>, 298 K]:  $\delta =$  no signal observed

### Me<sub>3</sub>SiF

#### Me<sub>3</sub>SiF

<sup>1</sup>H NMR [400.17 MHz, NCCD<sub>3</sub>, 298 K]:  $\delta = 0.24$  (d, 9 H, Si-CH<sub>3</sub>, <sup>3</sup>J<sub>H,F</sub> = 7.5 Hz) ppm.

<sup>19</sup>F NMR [376.53 MHz, NCCD<sub>3</sub>, 298 K]:  $\delta = -157.6$  (s, 1 F, Me<sub>3</sub>SiF, <sup>3</sup>J<sub>H,F</sub> = 7.5 Hz) ppm.

### scXRD

*P*2<sub>1</sub>/*n*, *a* = 13.2484(7) Å, *b* = 16.7851(11) Å, *c* = 44.788(3) Å,  $\alpha = 90^\circ$ ,  $\beta = 95.969^\circ$ ,  $\gamma = 90^\circ$ ,  
*V* = 9905.8(10) Å<sup>3</sup>, *Z* = 8

## 5. NMR Spectroscopy

### 5.1. XeF<sub>2</sub> in 5FB

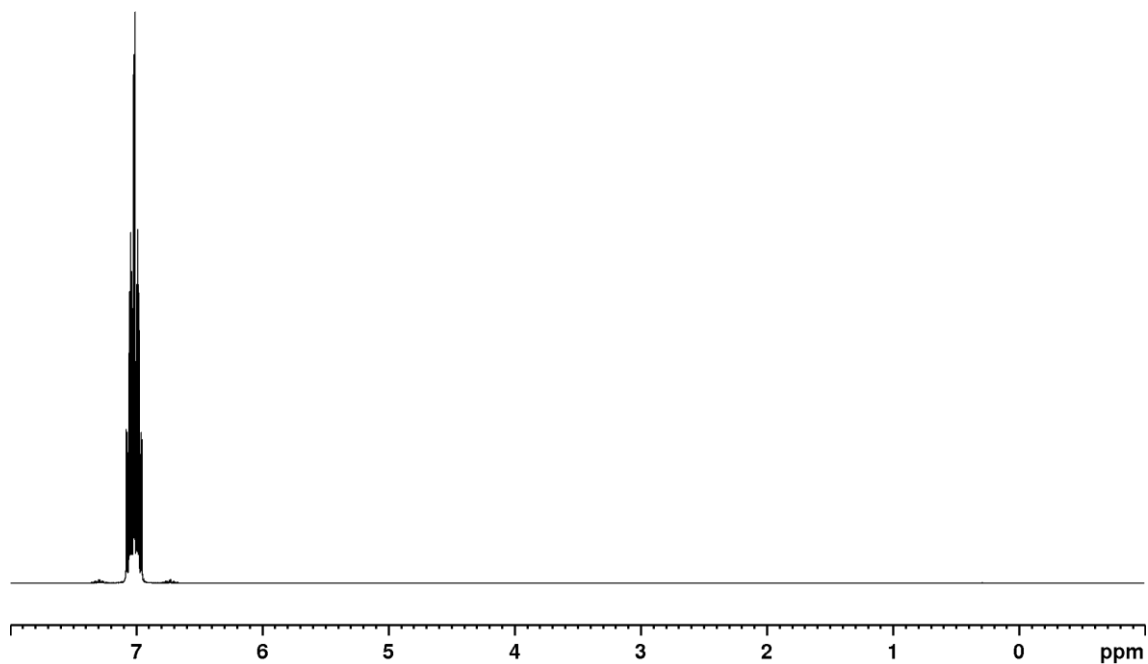

Figure S 6: <sup>1</sup>H NMR spectrum of XeF<sub>2</sub> in 5FB (300.18 MHz, 5FB, 298 K).

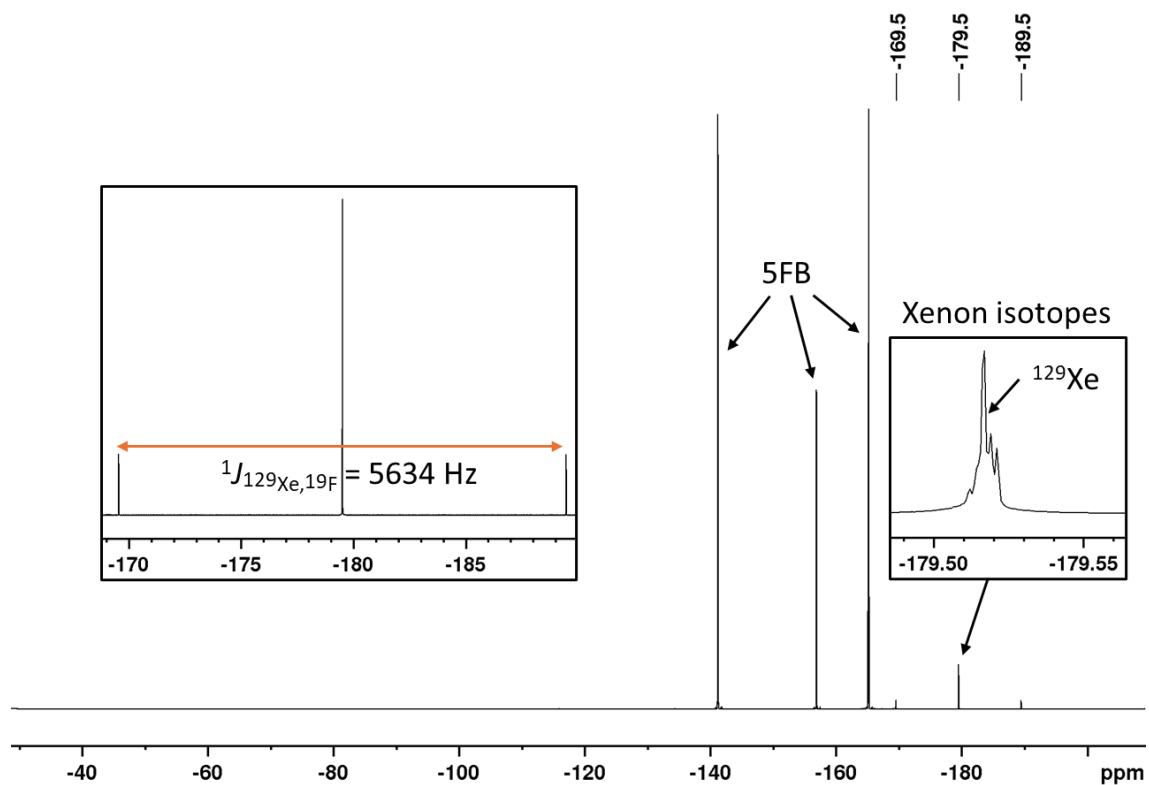

Figure S 7:  $^{19}\text{F}$  NMR spectrum directly after dissolving  $\text{XeF}_2$  in 5FB (282.45 MHz, 5FB, 298 K).

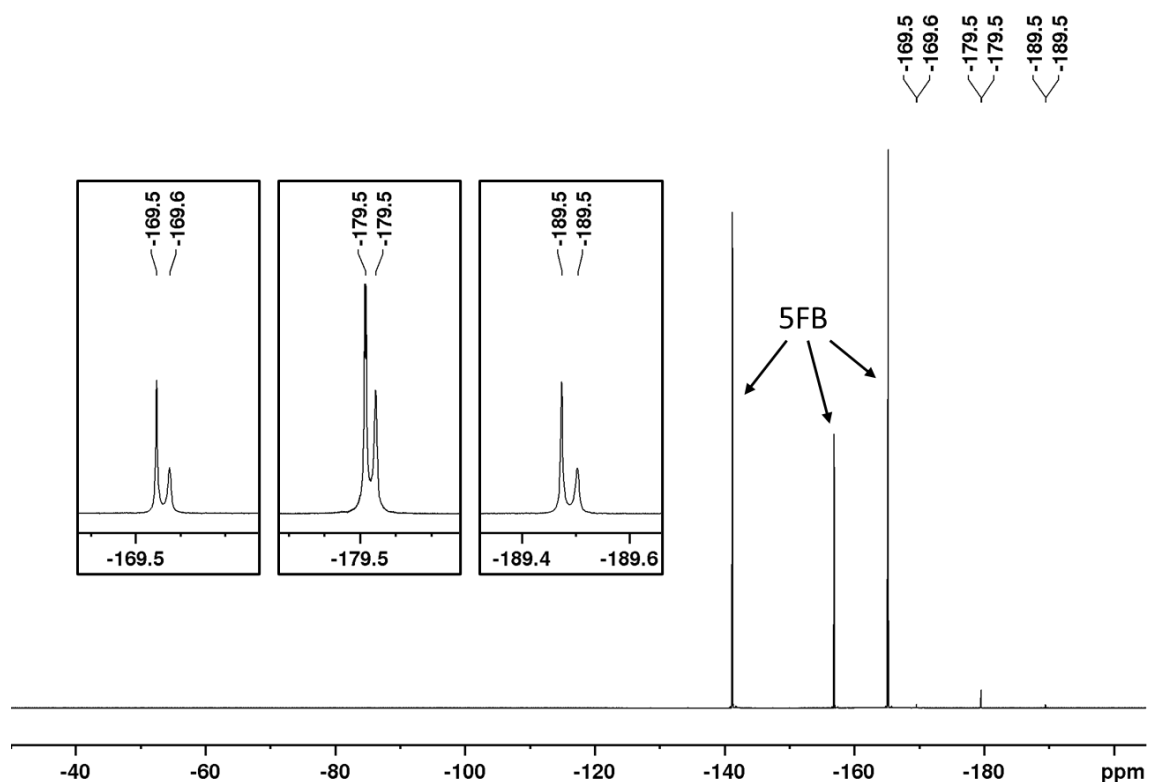

Figure S 8:  $^{19}\text{F}$  NMR spectrum of  $\text{XeF}_2$  in 5FB after 2h (282.45 MHz, 5FB, 298 K).

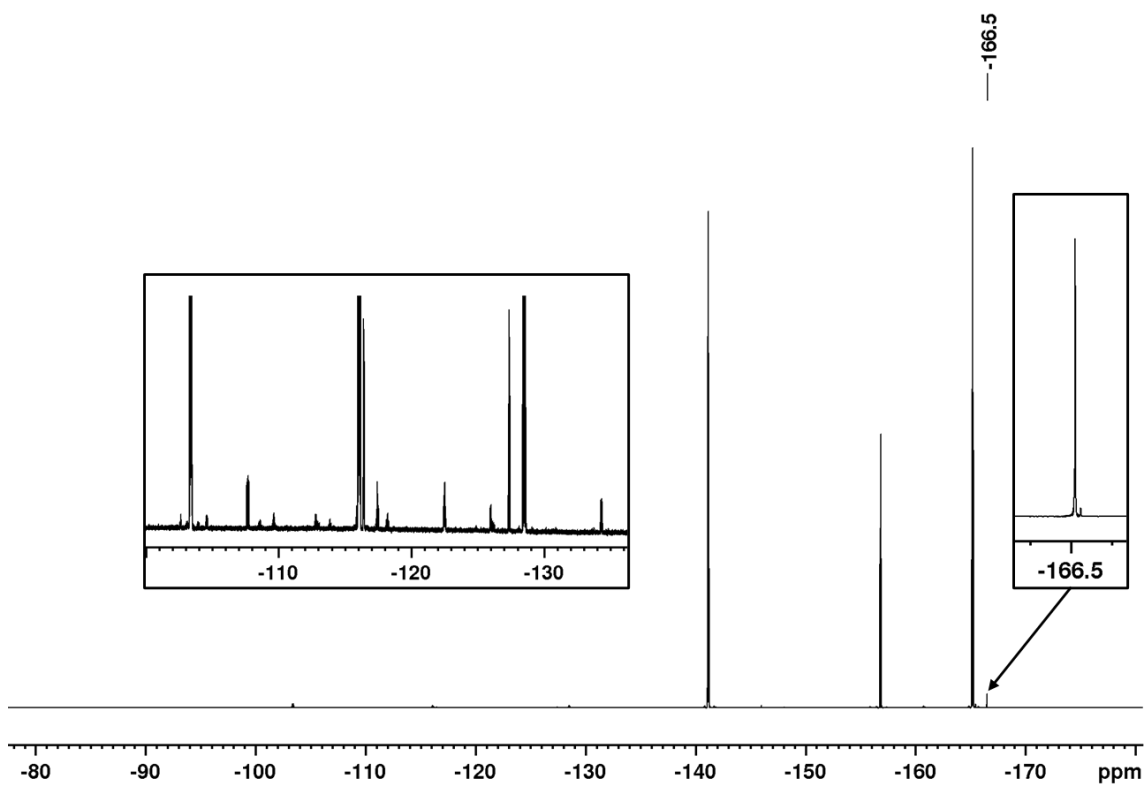

Figure S 9:  $^{19}\text{F}$  NMR spectrum of  $\text{XeF}_2$  in 5FB after 1d (282.45 MHz, 5FB, 298 K).

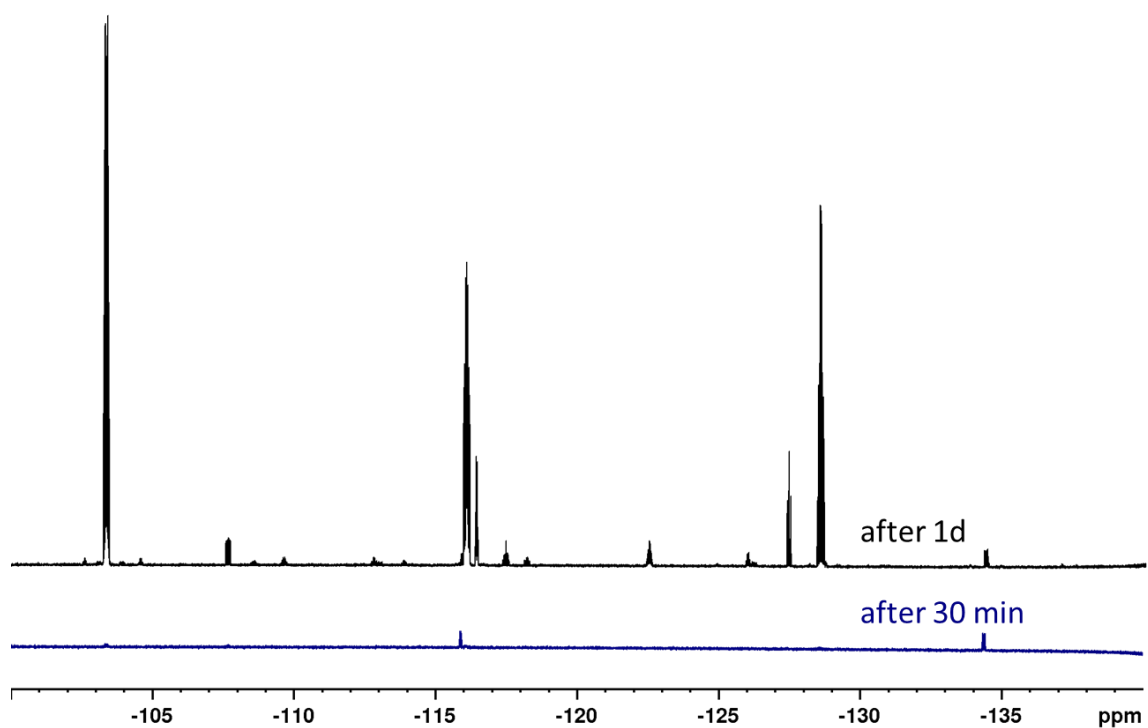

Figure S 10:  $^{19}\text{F}$  NMR spectrum of  $\text{XeF}_2$  in 5FB after 30 min (blue) and 1d (black) (282.45 MHz, 5FB, 298 K).

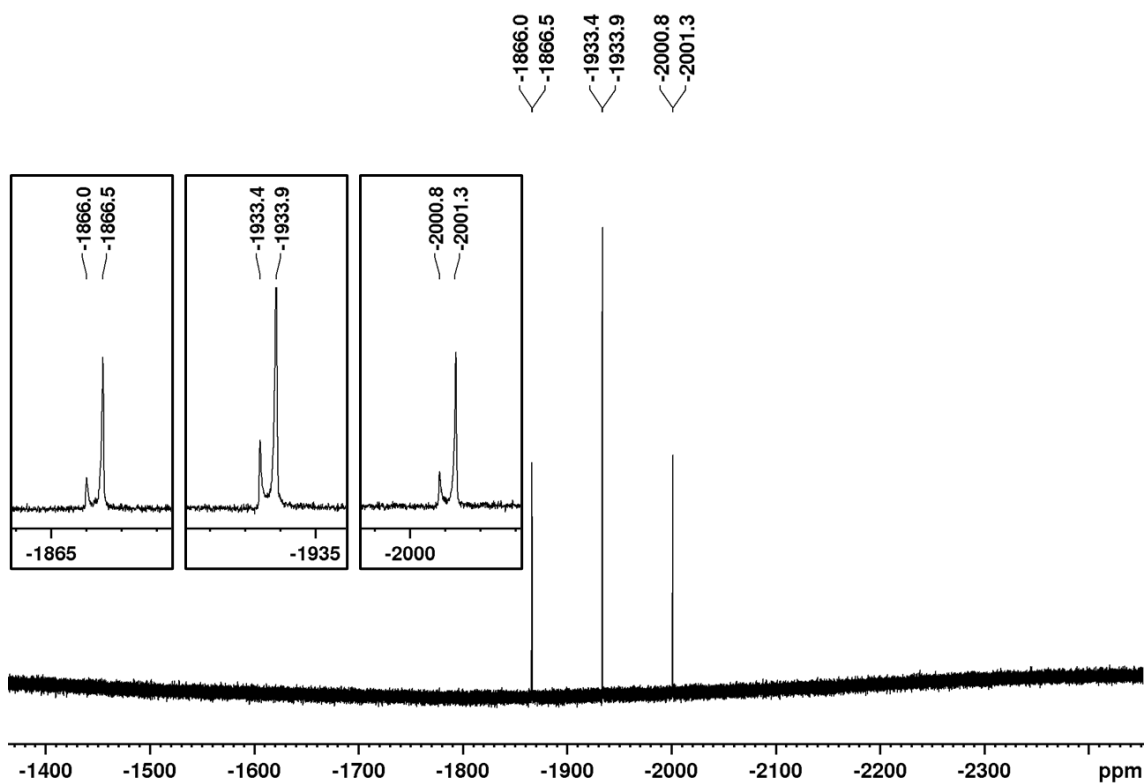

Figure S 11:  $^{129}\text{Xe}$  NMR spectrum of  $\text{XeF}_2$  in 5FB after 1h (83.48 MHz, 5FB, 298 K, calibrated to  $\text{XeOF}_4$ ).

## 5.2. $\text{XeF}_2$ in Acetonitrile

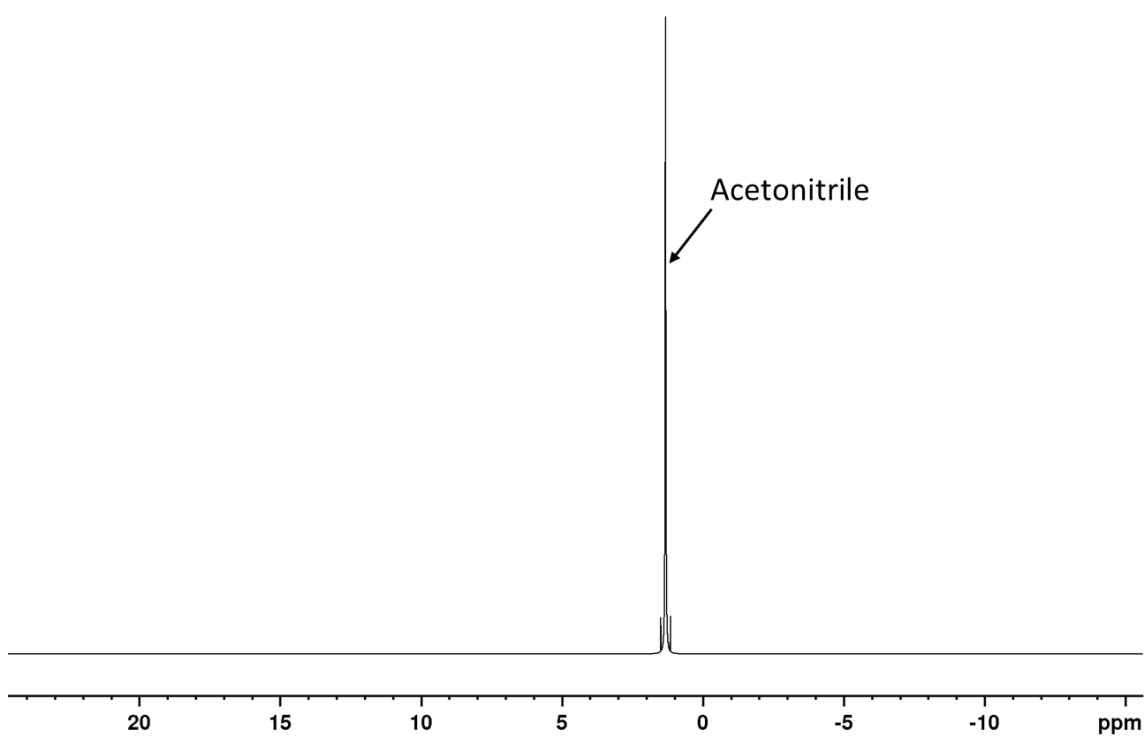

Figure S 12:  $^1\text{H}$  NMR spectrum of  $\text{XeF}_2$  in MeCN (400.18 MHz, MeCN, 298 K).

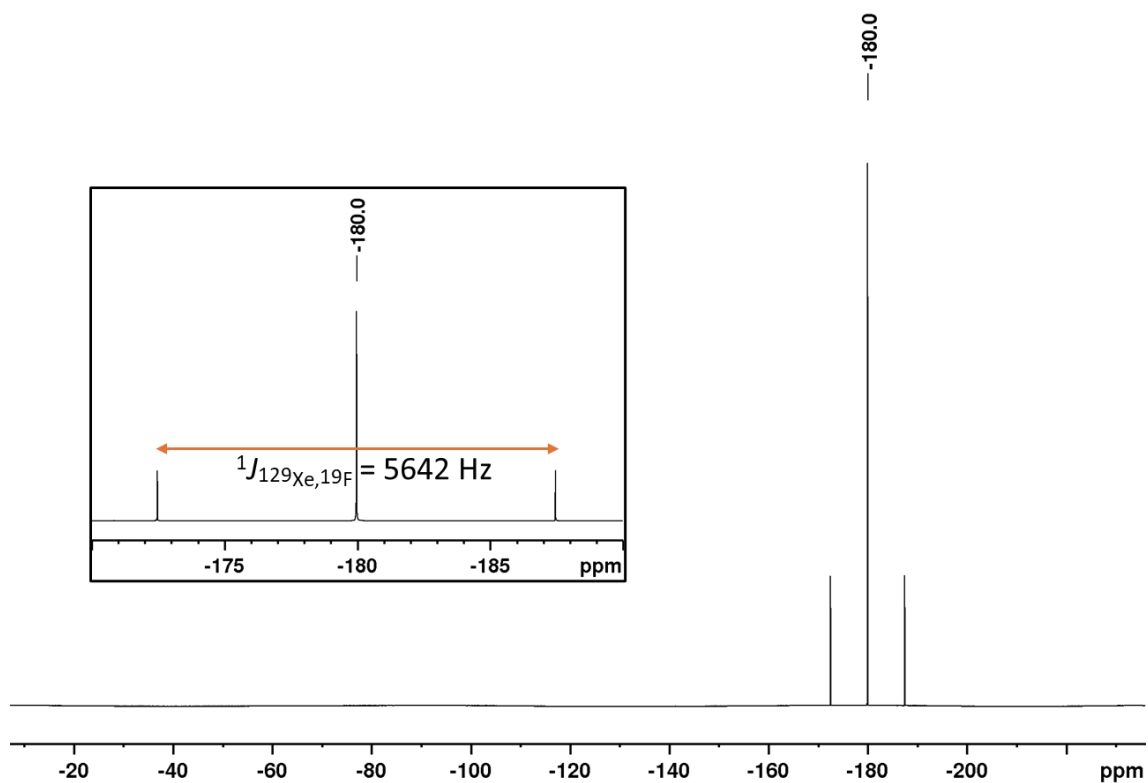

Figure S 13:  $^{19}\text{F}$  NMR spectrum of  $\text{XeF}_2$  in  $\text{MeCN}$  (376.54 MHz,  $\text{MeCN}$ , 298 K).

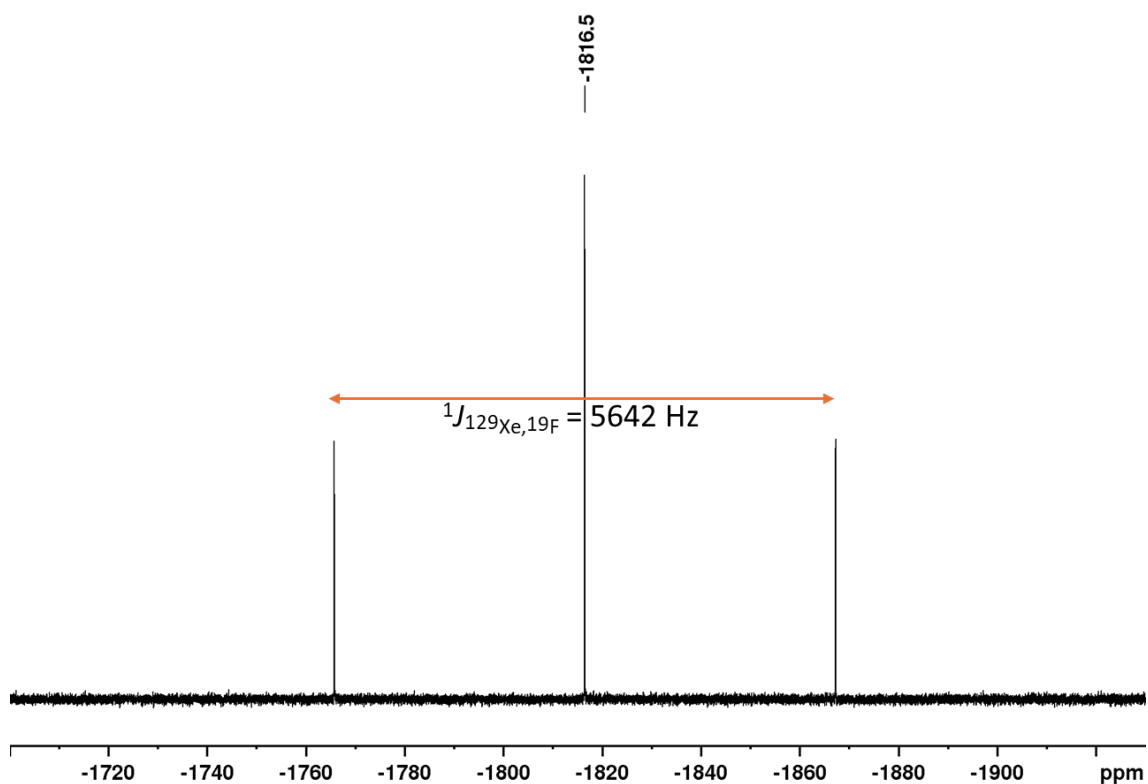

Figure S 14:  $^{129}\text{Xe}$  NMR spectrum of  $\text{XeF}_2$  in  $\text{MeCN}$  (111.29 MHz,  $\text{MeCN}$ , 298 K, calibrated to  $\text{XeOF}_4$ ).

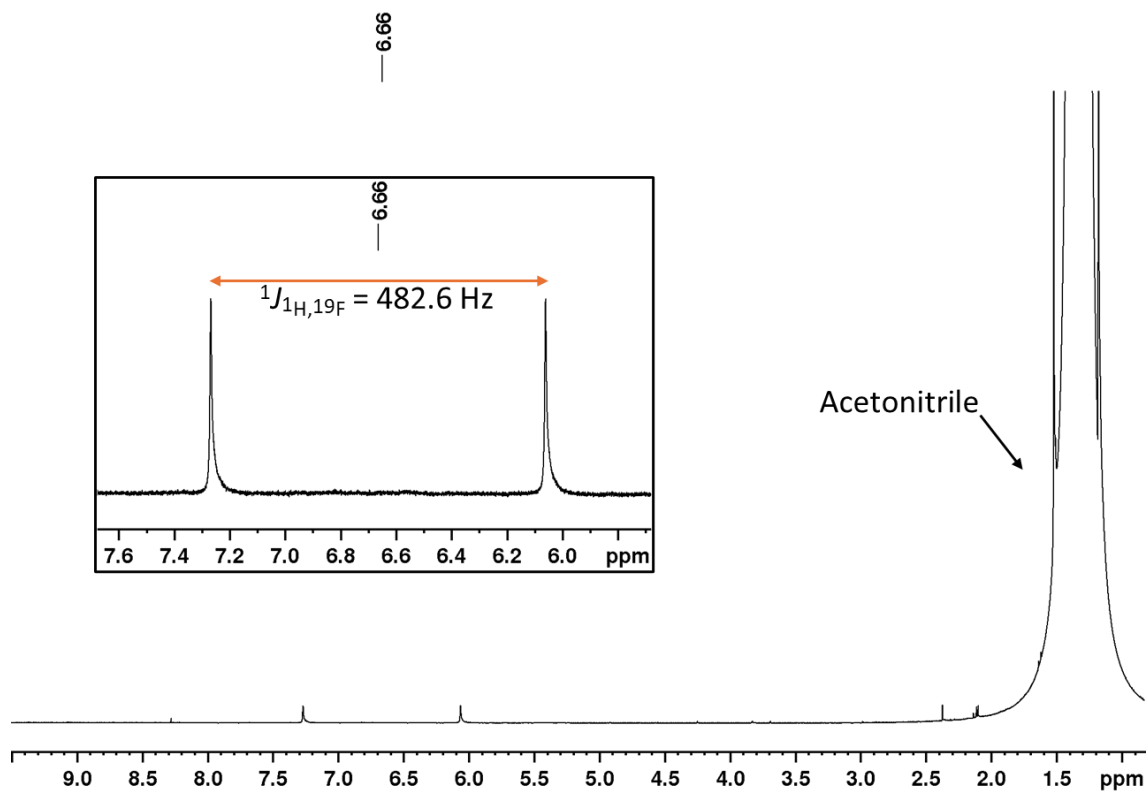

Figure S 15:  $^1\text{H}$  NMR spectrum of  $\text{XeF}_2$  in MeCN after 3d (400.18 MHz, MeCN, 298 K).

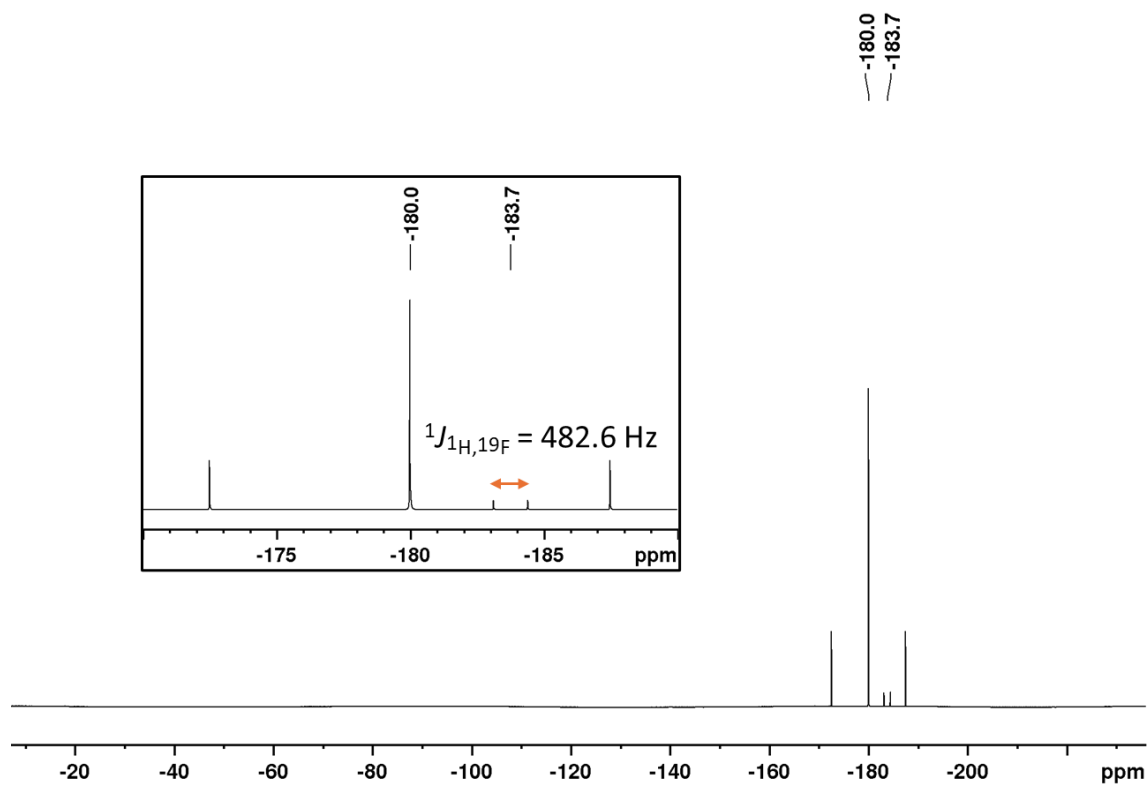

Figure S 16:  $^{19}\text{F}$  NMR spectrum of  $\text{XeF}_2$  in MeCN after 3d (376.54 MHz, MeCN, 298 K).

### 5.3. Biphenyl – Reaction of $\text{XeF}_2/2\text{Li}[\text{Al}(\text{OR}^F)_4]$ with Benzene

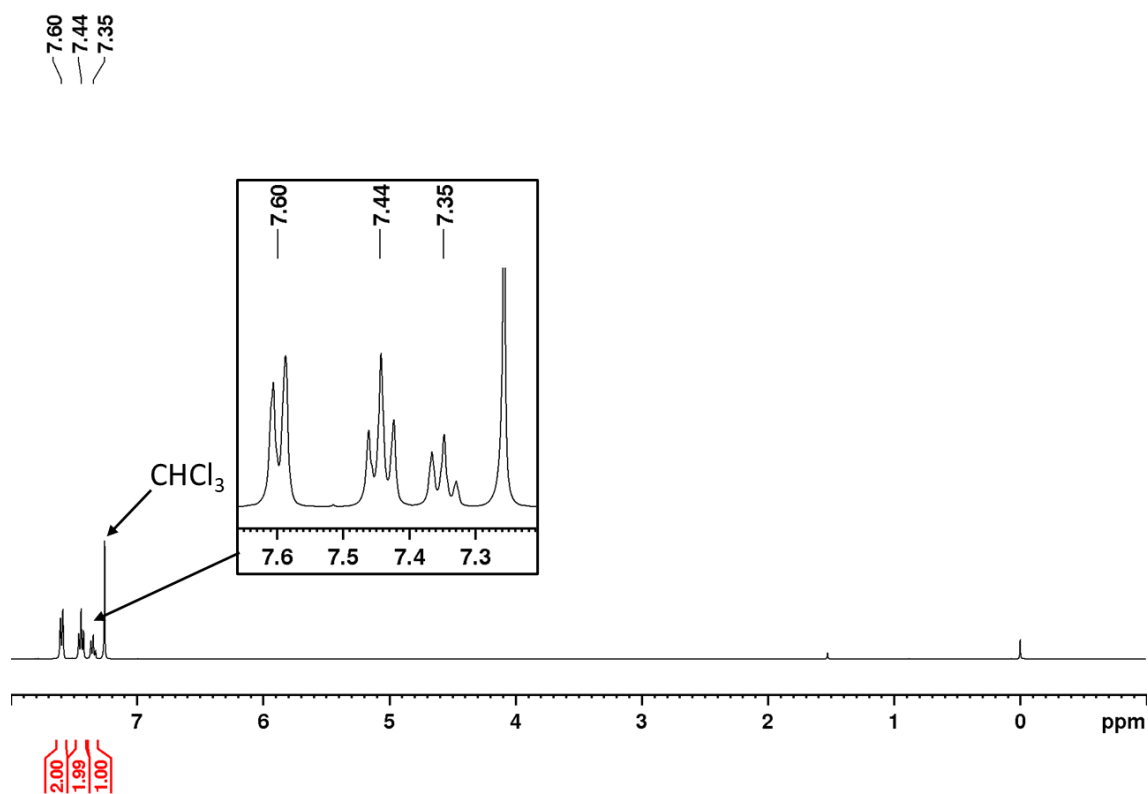

Figure S 17: <sup>1</sup>H NMR spectrum of biphenyl (400.17 MHz, CDCl<sub>3</sub>, 298 K).

### 5.4. 4,4'-Difluorobiphenyl – Reaction of $\text{XeF}_2/2\text{Li}[\text{Al}(\text{OR}^F)_4]$ with Fluorobenzene

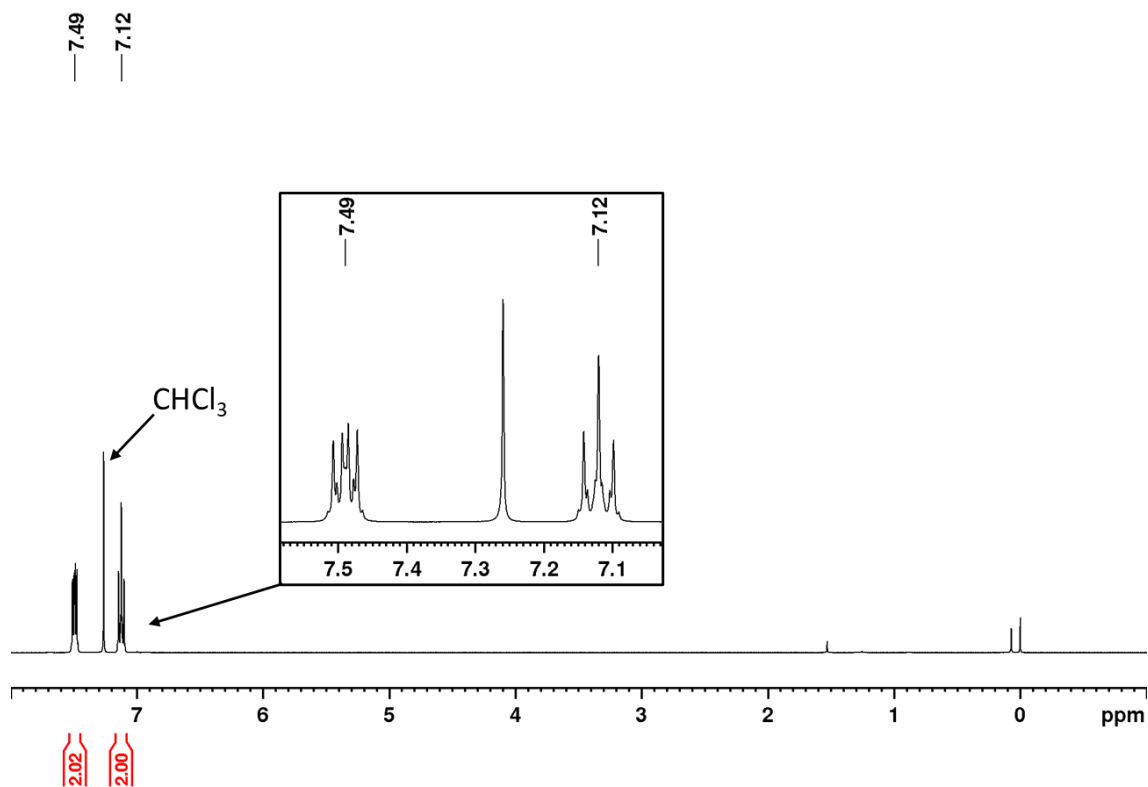

Figure S 18: <sup>1</sup>H NMR spectrum of 4,4'-difluorobiphenyl (400.17 MHz, CDCl<sub>3</sub>, 298 K).

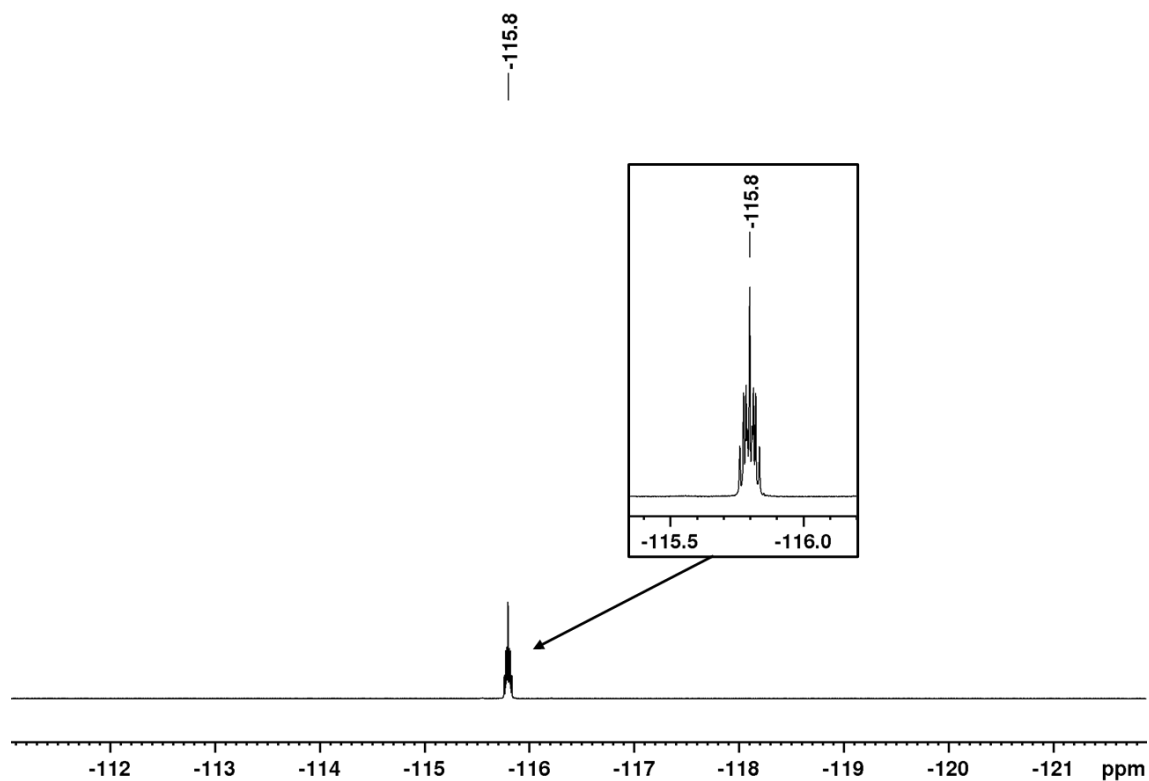

Figure S 19:  $^{19}\text{F}$  NMR spectrum of 4,4'-difluorobiphenyl (376.53 MHz,  $\text{CDCl}_3$ , 298 K).

### 5.5. 3,3',4,4'-Tetrafluorobiphenyl – Reaction of $\text{XeF}_2/2\text{Li}[\text{Al}(\text{OR}^F)_4]$ with 1,2-Difluorobenzene

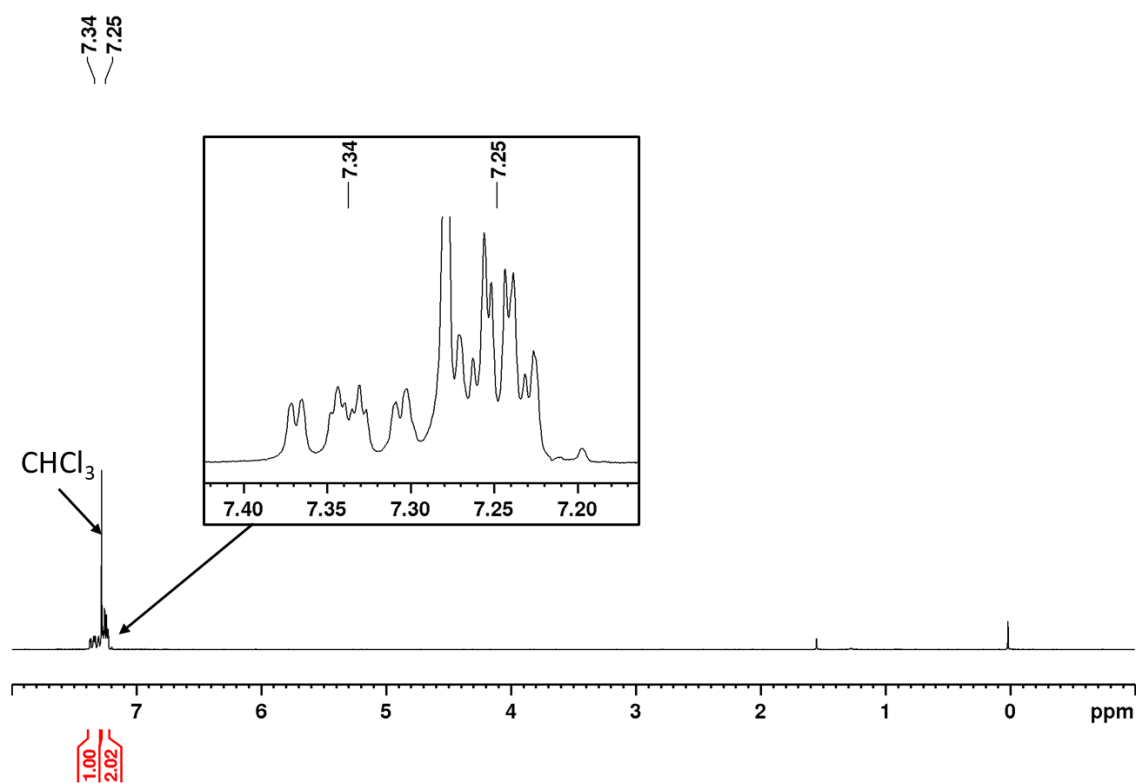

Figure S 20:  $^1\text{H}$  NMR spectrum of 3,3',4,4'-tetrafluorobiphenyl (300.18 MHz,  $\text{CDCl}_3$ , 298 K).

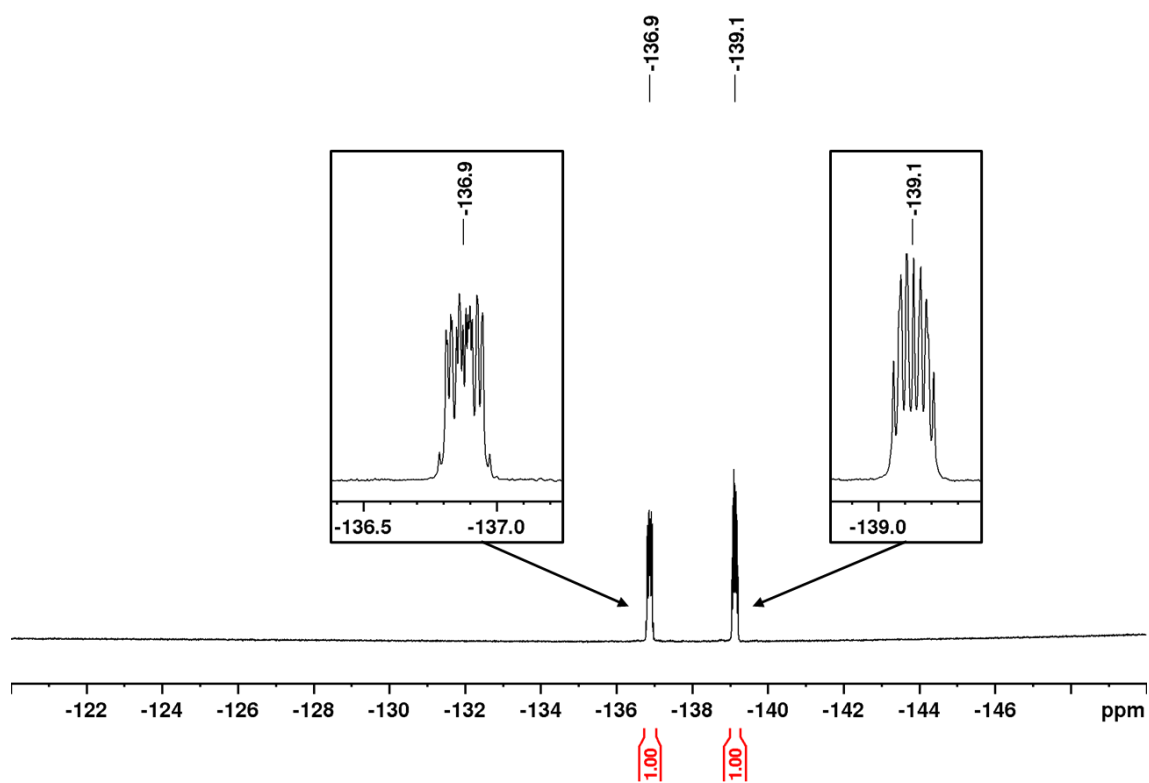

Figure S 21:  $^{19}\text{F}$  NMR spectrum of 3,3',4,4'-tetrafluorobiphenyl (282.45 MHz,  $\text{CDCl}_3$ , 298 K).

### 5.6. $[\text{2,3,4-C}_6\text{H}_2\text{F}_3\text{Xe}]^+$ – Reaction of $\text{XeF}_2/2\text{Li}[\text{Al}(\text{OR}^f)_4]$ with 1,2,3-Trifluorobenzene

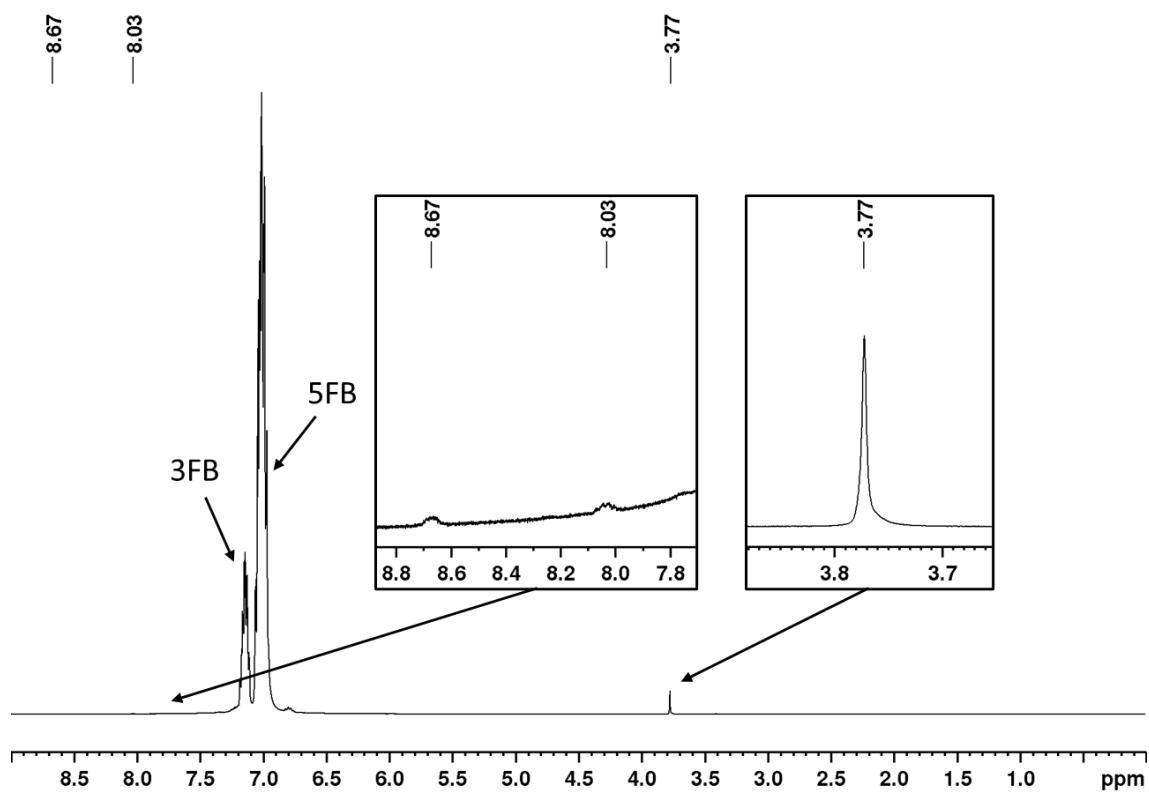

Figure S 22:  $^1\text{H}$  NMR spectrum of the reaction of  $\text{XeF}_2/2\text{Li}[\text{Al}(\text{OR}^f)_4]$  with 3FB (400.17 MHz, 3FB/5FB (1:4), 243 K).

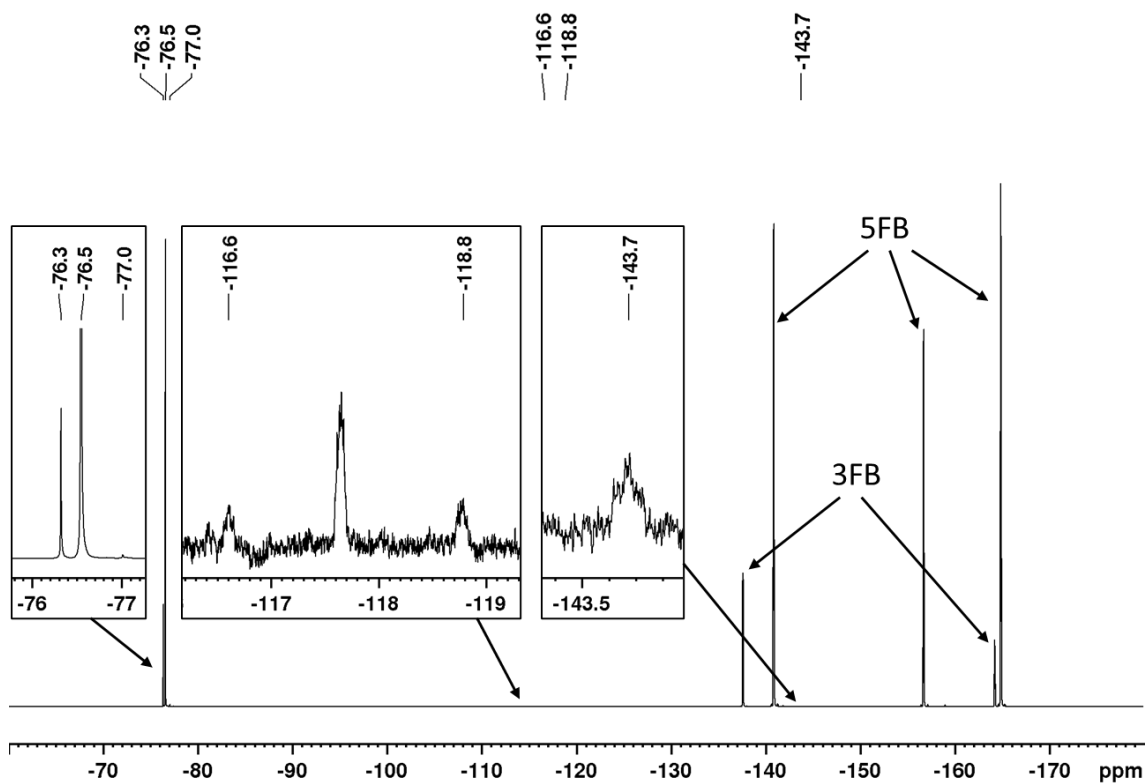

Figure S 23:  $^{19}\text{F}$  NMR spectrum of the reaction of  $\text{XeF}_2/2\text{Li}[\text{Al}(\text{OR}^{\text{F}})_4]$  with 3FB (376.54 MHz, 3FB/5FB (1:4), 243 K).

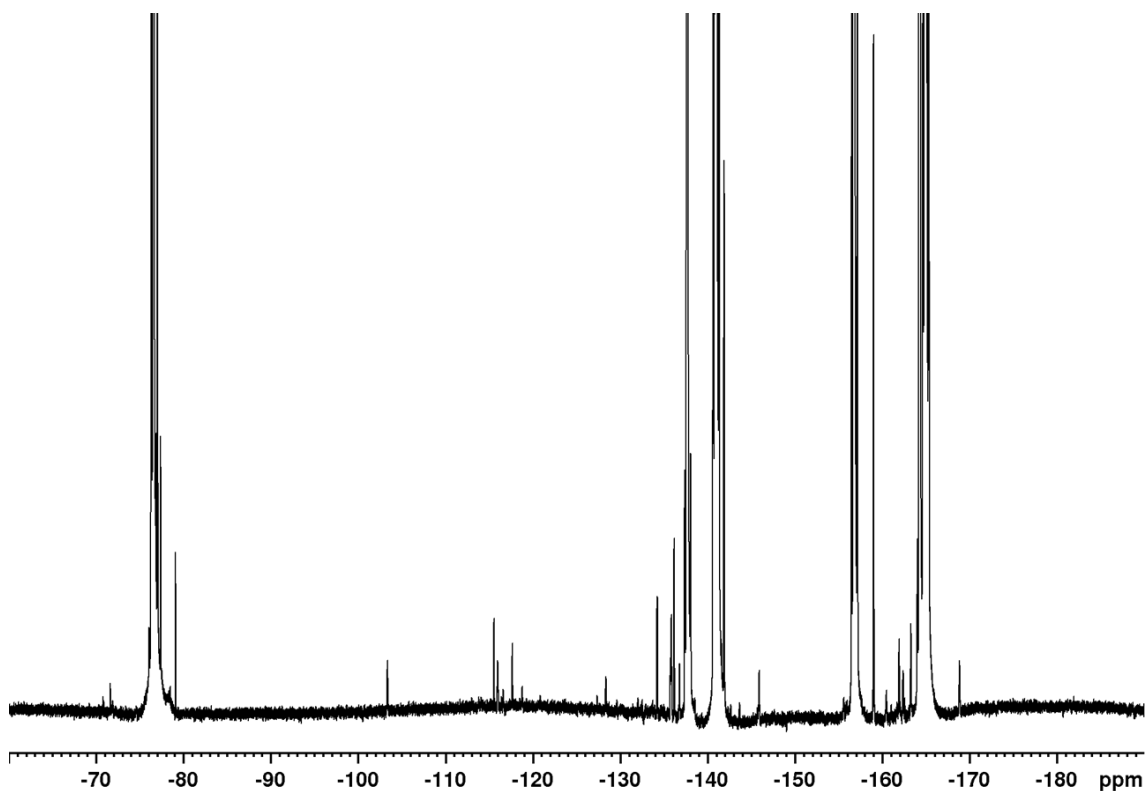

Figure S 24:  $^{19}\text{F}$  NMR spectrum of the reaction of  $\text{XeF}_2/2\text{Li}[\text{Al}(\text{OR}^{\text{F}})_4]$  with 3FB (376.54 MHz, 3FB/5FB (1:4), 243 K).

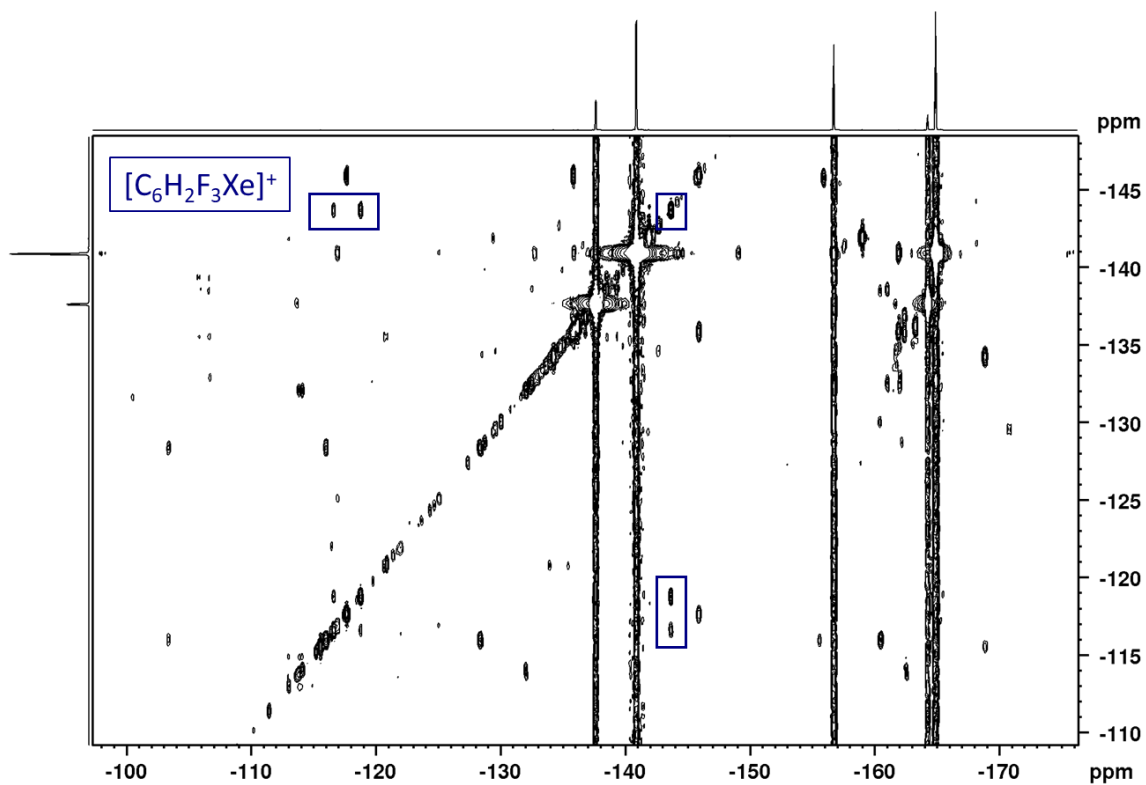

Figure S 25:  $^{19}\text{F}$ - $^{19}\text{F}$  COSY NMR spectrum of the reaction of  $\text{XeF}_2/2\text{Li}[\text{Al}(\text{OR}^{\text{F}})_4]$  with 3FB (376.54 MHz, 3FB/5FB (1:4), 243 K, optimized for  $J = 15$  Hz).

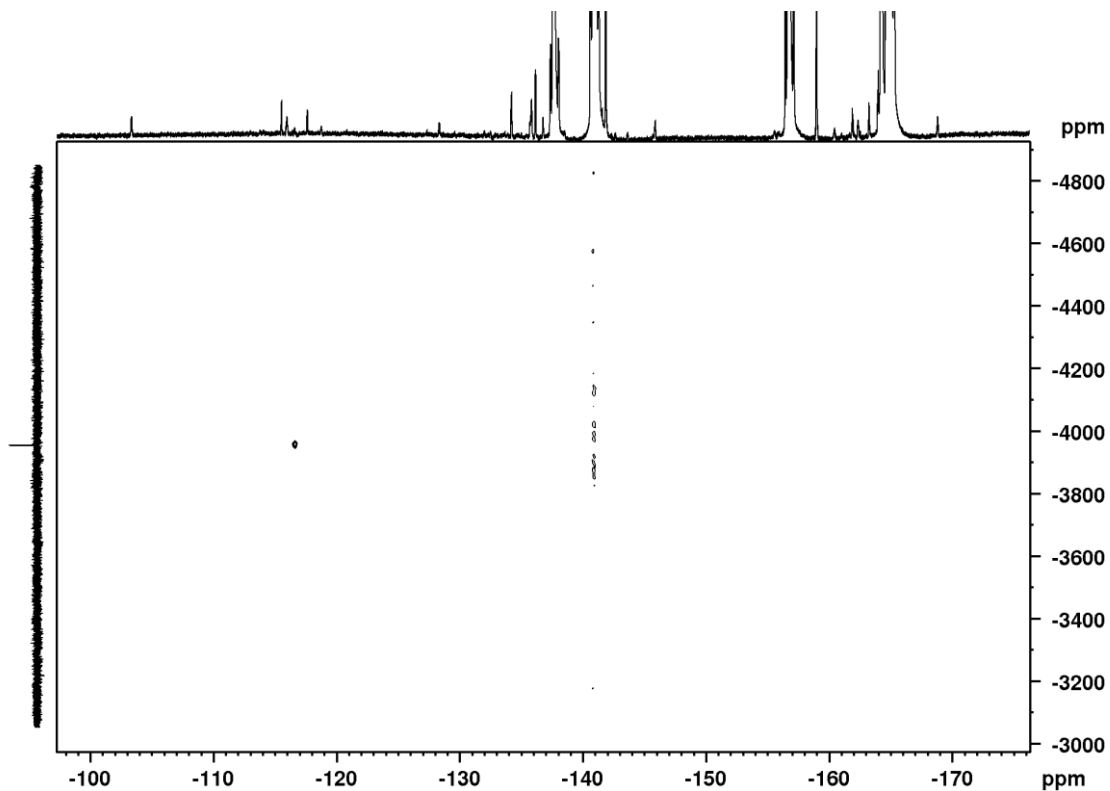

Figure S 26:  $^{19}\text{F}$ - $^{129}\text{Xe}$  HMBC NMR spectrum of the reaction of  $\text{XeF}_2/2\text{Li}[\text{Al}(\text{OR}^{\text{F}})_4]$  with 3FB (376.54 MHz, 3FB/5FB (1:4), 243 K, optimized for  $J = 100$  Hz).

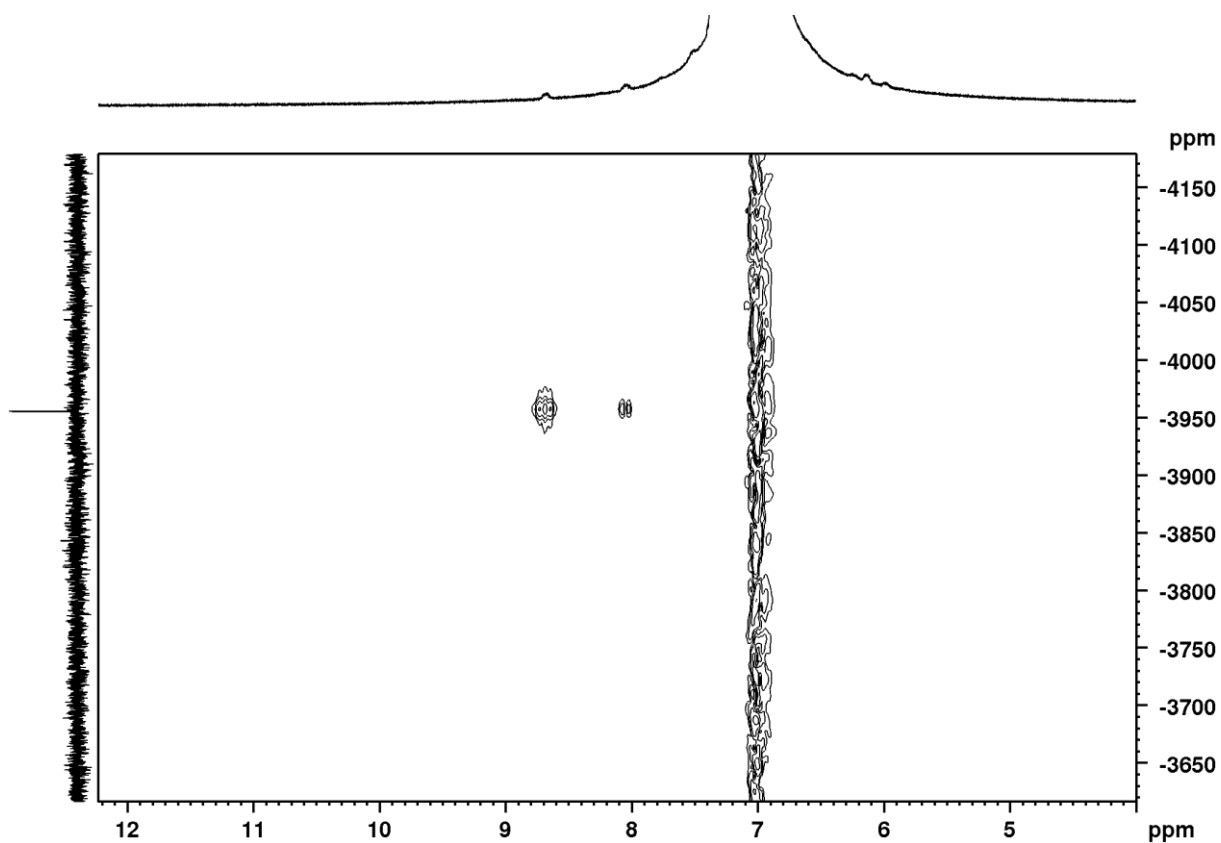

Figure S 27:  $^1\text{H}$ - $^{129}\text{Xe}$  HMBC NMR spectrum of the reaction of  $\text{XeF}_2/2\text{Li}[\text{Al}(\text{OR}^f)_4]$  with 3FB (400.17 MHz, 3FB/5FB (1:4), 243 K, optimized for  $J = 50$  Hz).

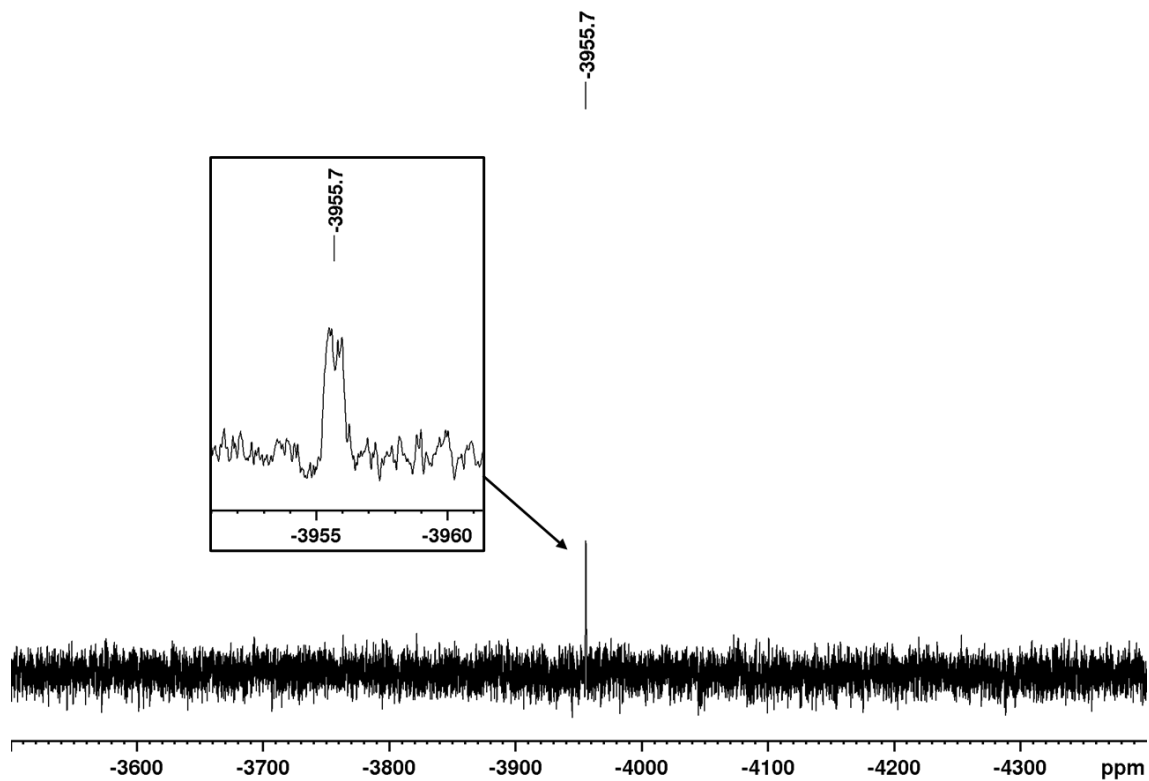

Figure S 28:  $^{129}\text{Xe}$  NMR spectrum of the reaction of  $\text{XeF}_2/2\text{Li}[\text{Al}(\text{OR}^f)_4]$  with 3FB (111.29 MHz, 3FB/5FB (1:4), 243 K).

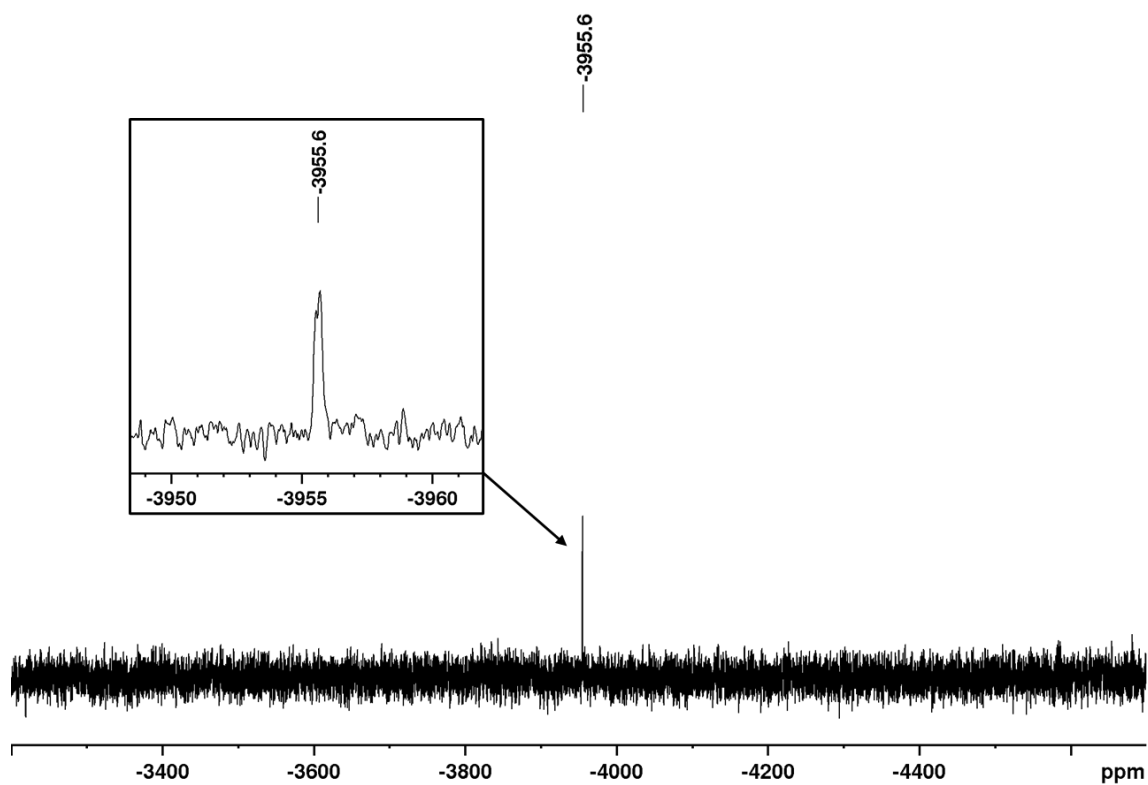

Figure S 29:  $^{129}\text{Xe}\{^{19}\text{F}\}$  NMR spectrum of the reaction of  $\text{XeF}_2/2\text{Li}[\text{Al}(\text{OR}^{\text{F}})_4]$  with 3FB (111.29 MHz, 3FB/5FB (1:4), 243 K).

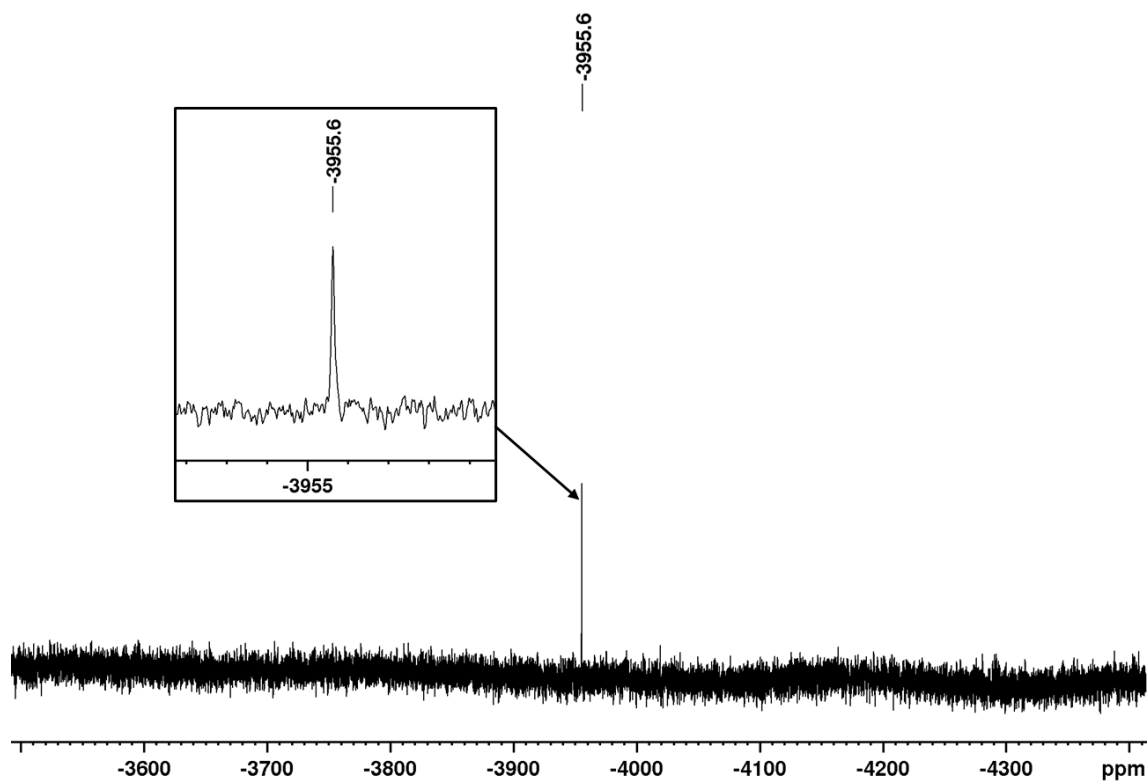

Figure S 30:  $^{129}\text{Xe}\{^1\text{H}, ^{19}\text{F}\}$  NMR spectrum of the reaction of  $\text{XeF}_2/2\text{Li}[\text{Al}(\text{OR}^{\text{F}})_4]$  with 3FB (111.29 MHz, 3FB/5FB (1:4), 243 K).

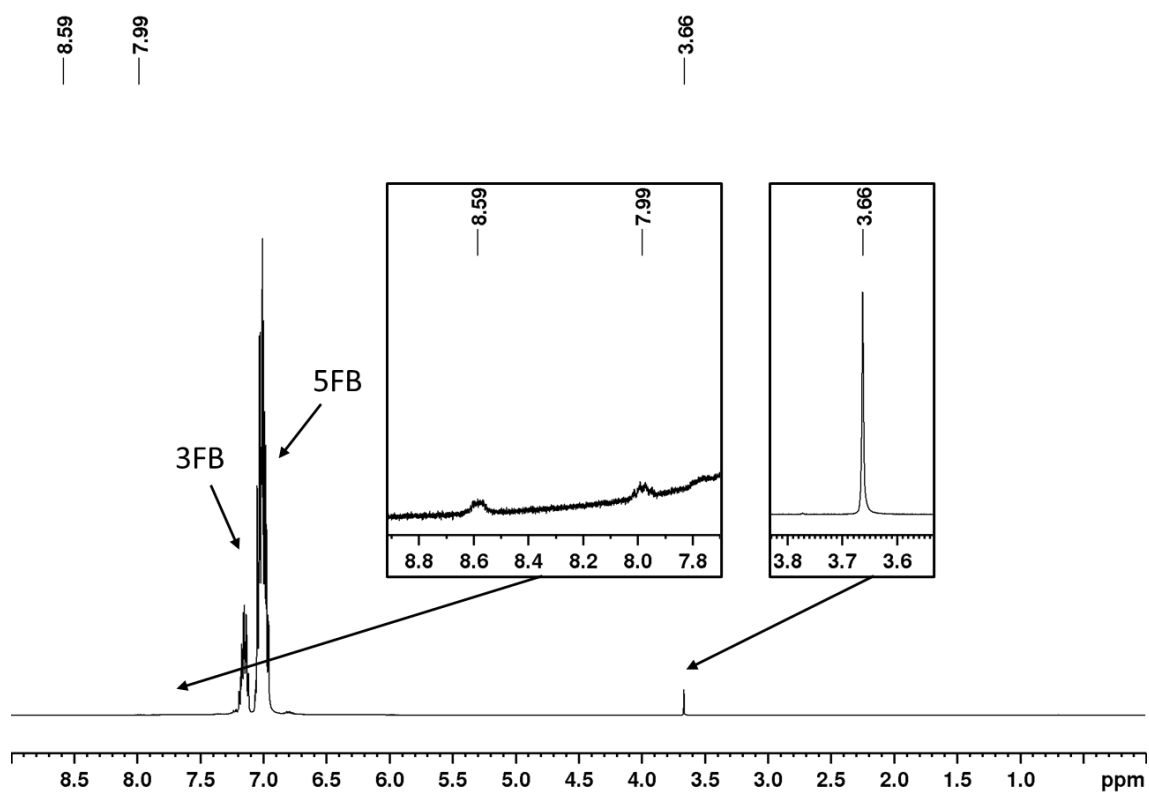

Figure S 31:  $^1\text{H}$  NMR spectrum of the reaction of  $\text{XeF}_2/2\text{Li}[\text{Al}(\text{OR}^f)_4]$  with 3FB (400.17 MHz, 3FB/5FB (1:4), 298 K).

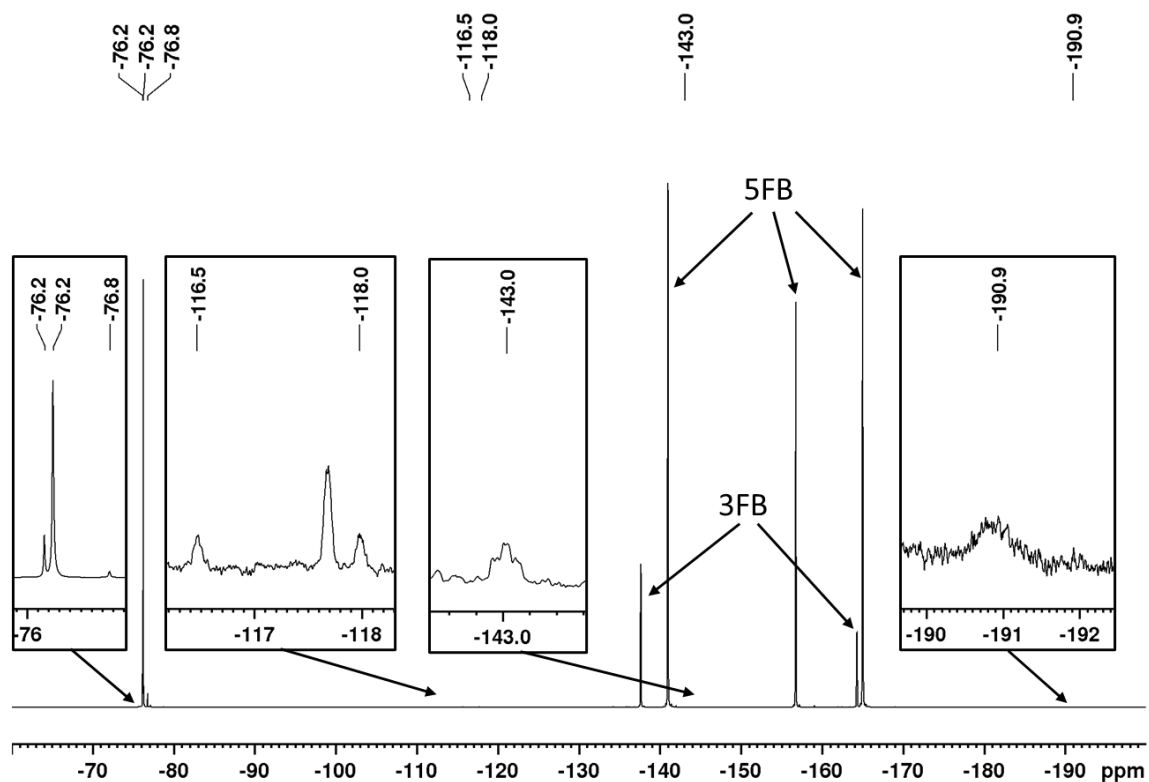

Figure S 32:  $^{19}\text{F}$  NMR spectrum of the reaction of  $\text{XeF}_2/2\text{Li}[\text{Al}(\text{OR}^f)_4]$  with 3FB (376.54 MHz, 3FB/5FB (1:4), 298 K).

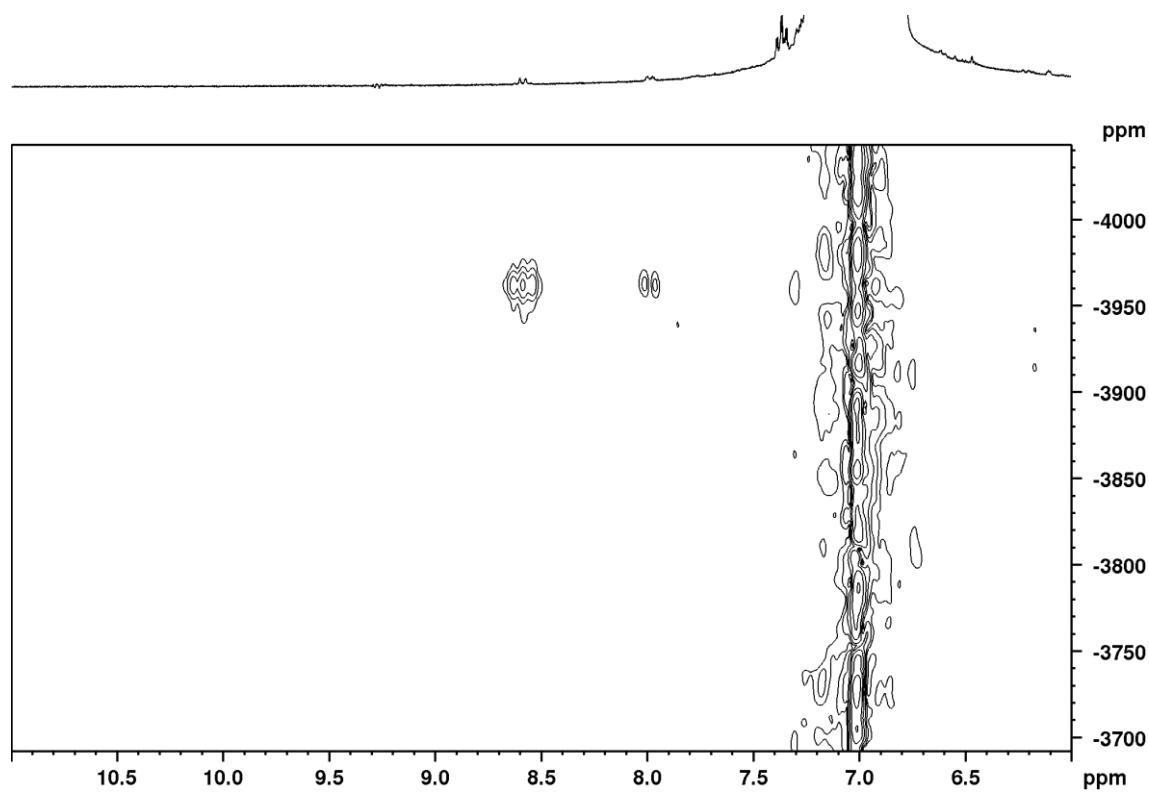

Figure S 33:  $^1\text{H}$ - $^{129}\text{Xe}$  HMBC NMR spectrum of the reaction of  $\text{XeF}_2/2\text{Li}[\text{Al}(\text{OR}^f)_4]$  with 3FB (400.17 MHz, 3FB/5FB (1:4), 298 K, optimized for  $J = 50$  Hz).

### 5.7. $[\text{C}_6\text{F}_5\text{Xe}][\text{FAl}(\text{OR}^f)_3]$

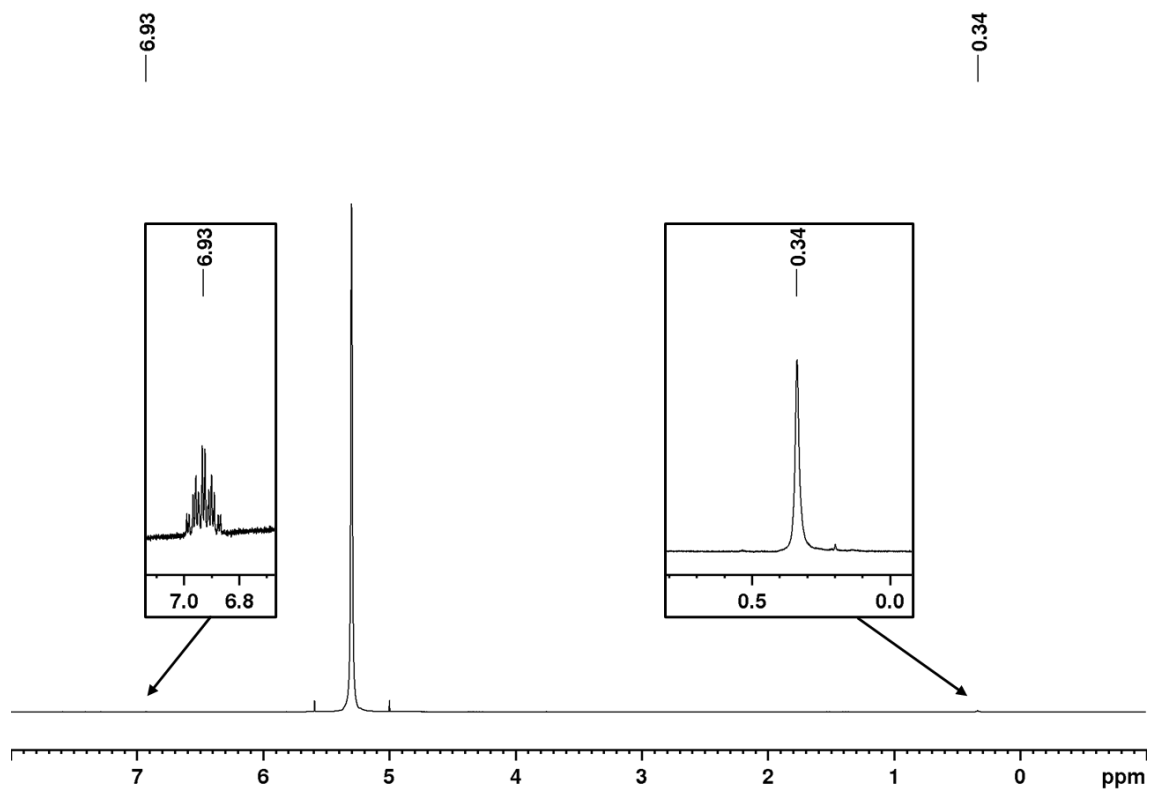

Figure S 34:  $^1\text{H}$  NMR spectrum of the isolated crystals from the reaction  $\text{XeF}_2 + \text{B}(\text{C}_6\text{F}_5)_3 + \text{Me}_3\text{SiF-Al}(\text{OR}^f)_3$  (300.18 MHz,  $\text{CH}_2\text{Cl}_2$ , 298 K).

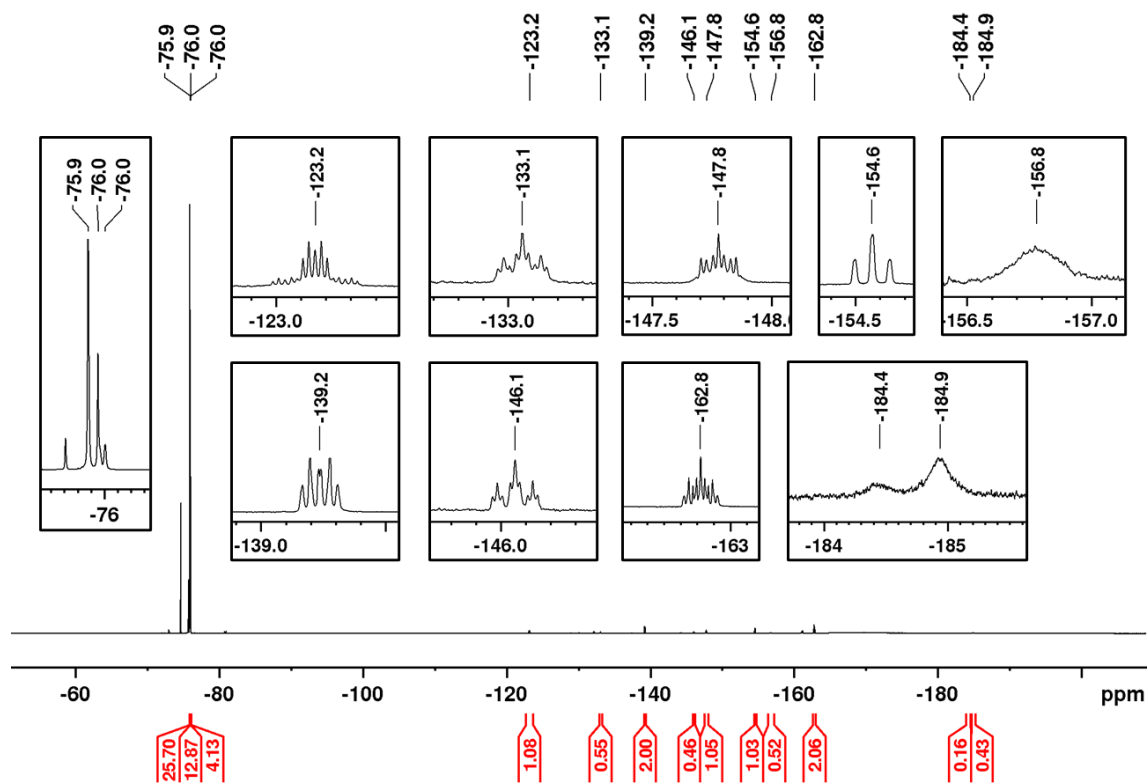

Figure S 35:  $^{19}\text{F}$  NMR spectrum of the isolated crystals from the reaction  $\text{XeF}_2 + \text{B}(\text{C}_6\text{F}_5)_3 + \text{Me}_3\text{SiF-Al}(\text{OR}^f)_3$  (282.45 MHz,  $\text{CH}_2\text{Cl}_2$ , 298 K).

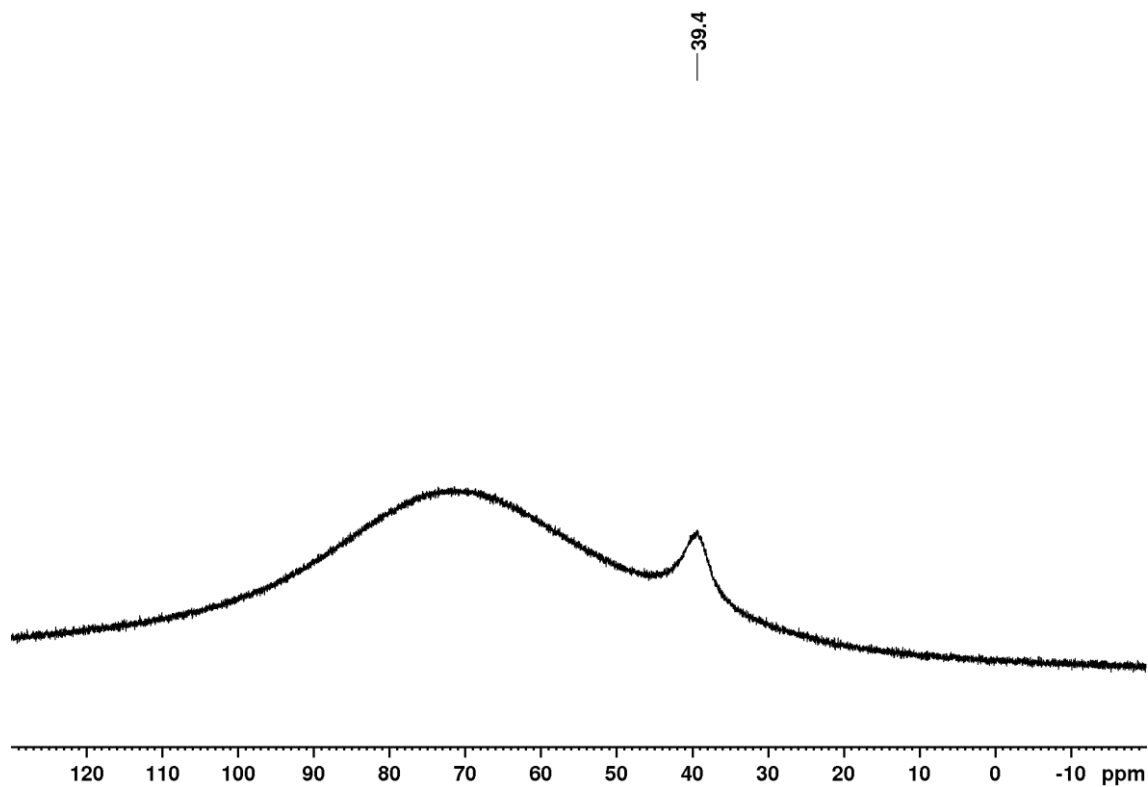

Figure S 36:  $^{27}\text{Al}$  NMR spectrum of the isolated crystals from the reaction  $\text{XeF}_2 + \text{B}(\text{C}_6\text{F}_5)_3 + \text{Me}_3\text{SiF-Al}(\text{OR}^f)_3$  (78.22 MHz,  $\text{CH}_2\text{Cl}_2$ , 298 K).

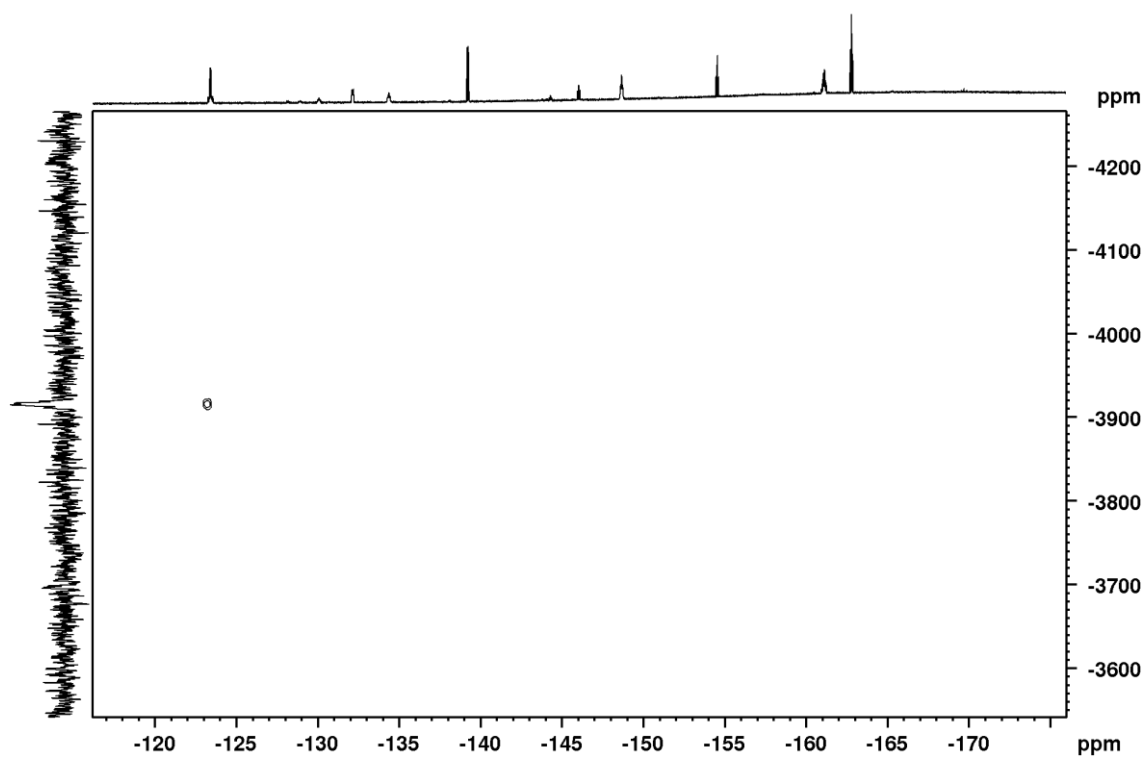

Figure S 37:  $^{19}\text{F}$ - $^{129}\text{Xe}$  HMBC NMR spectrum of the isolated crystals from the reaction  $\text{XeF}_2 + \text{B}(\text{C}_6\text{F}_5)_3 + \text{Me}_3\text{SiF-Al}(\text{OR}^f)_3$  (282.45 MHz,  $\text{CH}_2\text{Cl}_2$ , 298 K, optimized for  $J = 70$  Hz).

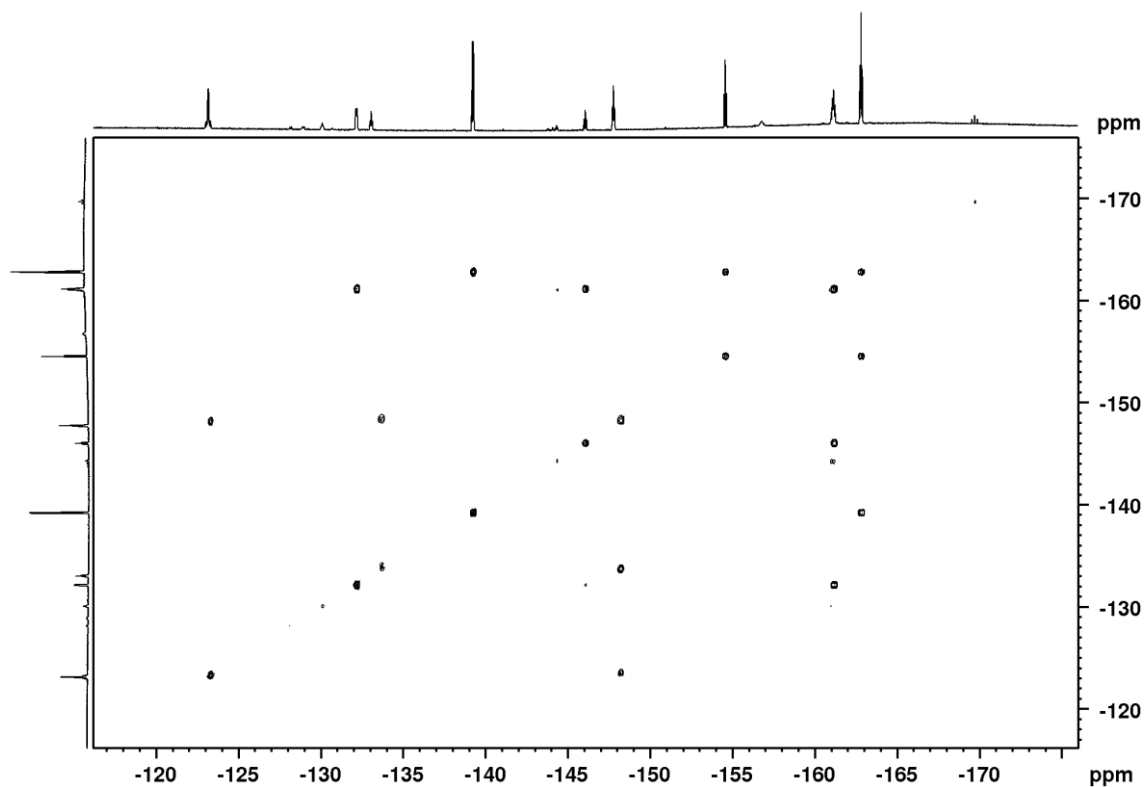

Figure S 38:  $^{19}\text{F}$ - $^{19}\text{F}$  COSY NMR spectrum of the isolated crystals from the reaction  $\text{XeF}_2 + \text{B}(\text{C}_6\text{F}_5)_3 + \text{Me}_3\text{SiF-Al}(\text{OR}^f)_3$  (282.45 MHz,  $\text{CH}_2\text{Cl}_2$ , 298 K, optimized for  $J = 15$  Hz).

5.8.  $[\text{C}_6\text{F}_5\text{Xe}][\text{F}(\text{Al}(\text{OR}^{\text{F}})_3)_2]$

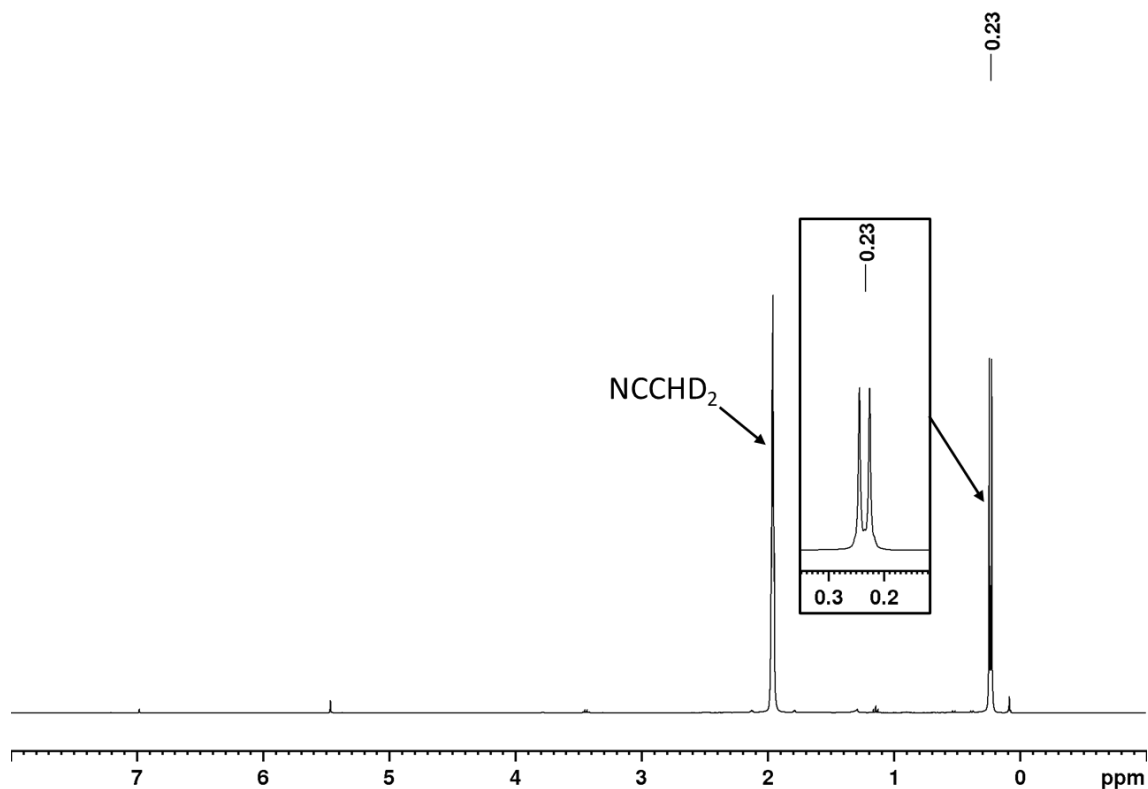

Figure S 39:  $^1\text{H}$  NMR spectrum of the isolated crystals from the reaction  $\text{XeF}_2 + \text{B}(\text{C}_6\text{F}_5)_3 + 2 \text{Me}_3\text{SiF-Al}(\text{OR}^{\text{F}})_3$  (400.17 MHz,  $\text{NCCD}_3$ , 298 K).

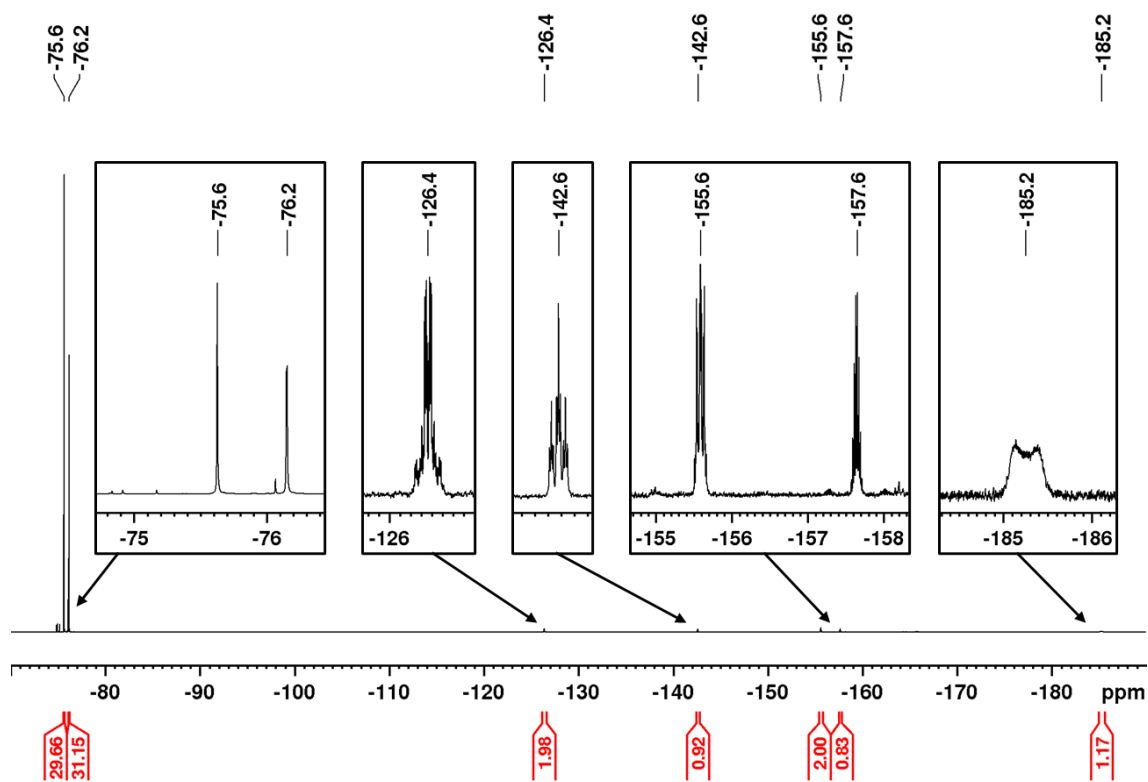

Figure S 40:  $^{19}\text{F}$  NMR spectrum of the isolated crystals from the reaction  $\text{XeF}_2 + \text{B}(\text{C}_6\text{F}_5)_3 + 2 \text{Me}_3\text{SiF-Al}(\text{OR}^{\text{F}})_3$  (376.54 MHz,  $\text{NCCD}_3$ , 298 K).

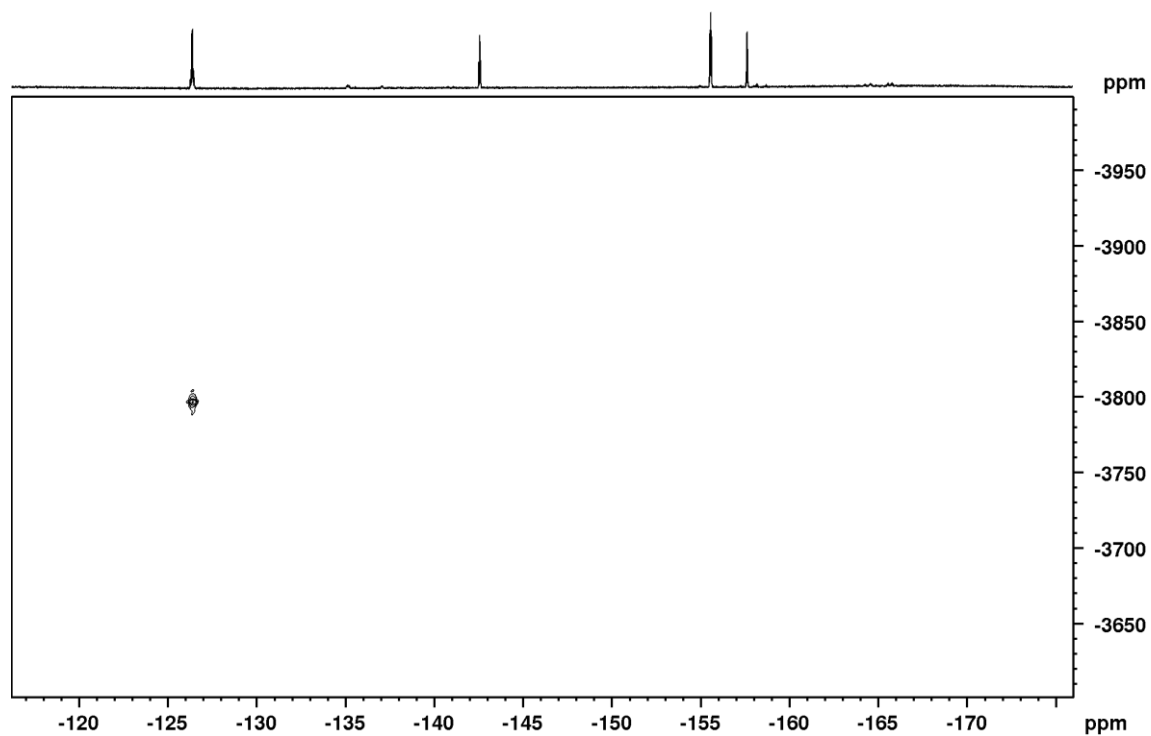

Figure S 41:  $^{19}\text{F}$ - $^{129}\text{Xe}$  NMR spectrum of the isolated crystals from the reaction  $\text{XeF}_2 + \text{B}(\text{C}_6\text{F}_5)_3 + 2 \text{Me}_3\text{SiF-Al}(\text{OR}^f)_3$  (376.54 MHz,  $\text{NCCD}_3$ , 298 K, optimized for  $J = 80$  Hz).

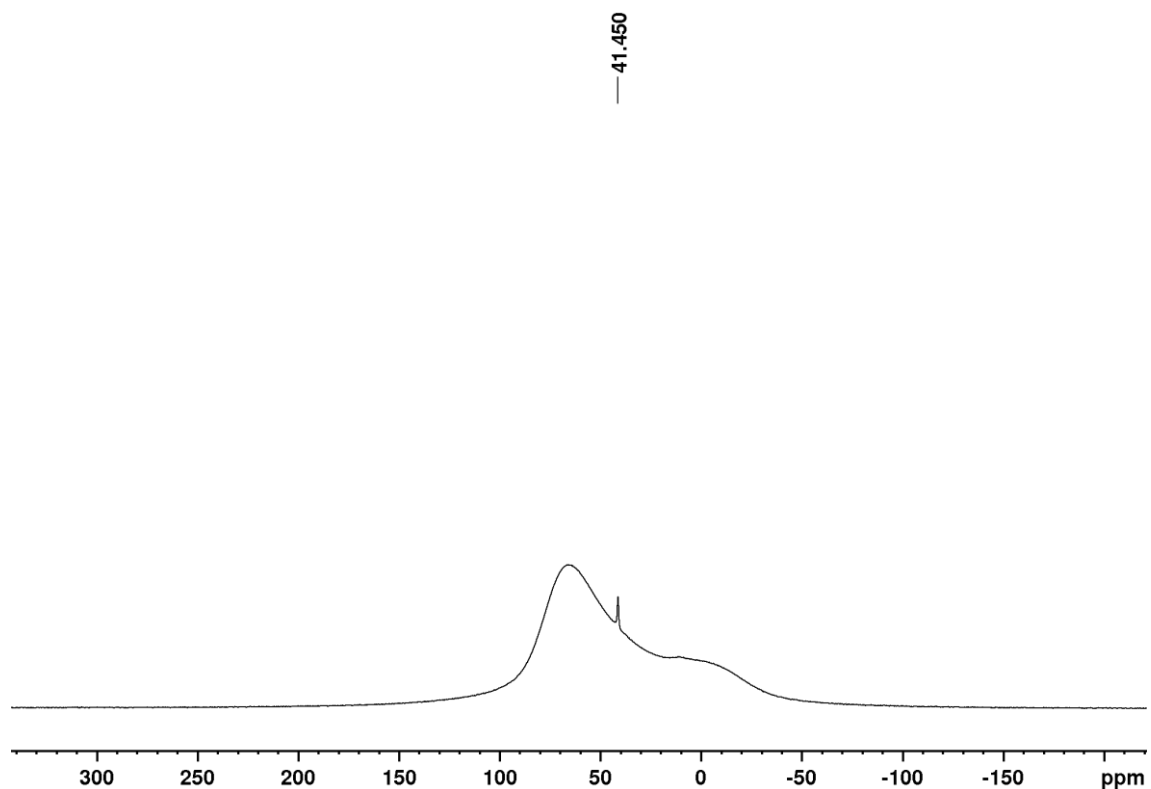

Figure S 42:  $^{27}\text{Al}$  NMR spectrum of the isolated crystals from the reaction  $\text{XeF}_2 + \text{B}(\text{C}_6\text{F}_5)_3 + 2 \text{Me}_3\text{SiF-Al}(\text{OR}^f)_3$  (104.27 MHz,  $\text{NCCD}_3$ , 298 K).

## 6. EPR Spectroscopy

### 6.1. Biphenyl – Reaction of $\text{XeF}_2/2\text{Li}[\text{Al}(\text{OR}^{\text{F}})_4]$ with Benzene

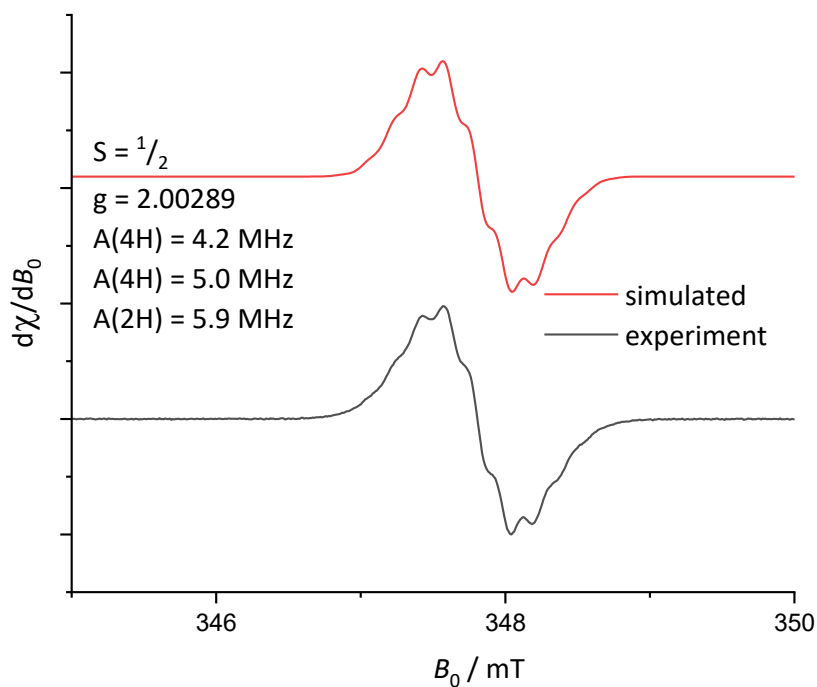

Figure S 43: Comparison of the measured EPR Spectrum of the reaction  $\text{XeF}_2/2\text{Li}[\text{Al}(\text{OR}^{\text{F}})_4]$  in 2FB/benzene (black) with the calculated EPR spectrum of biphenyl (red).

## 6.2. 4,4'-Difluorobiphenyl – Reaction of $\text{XeF}_2/2\text{Li}[\text{Al}(\text{OR}^f)_4]$ with Fluorobenzene

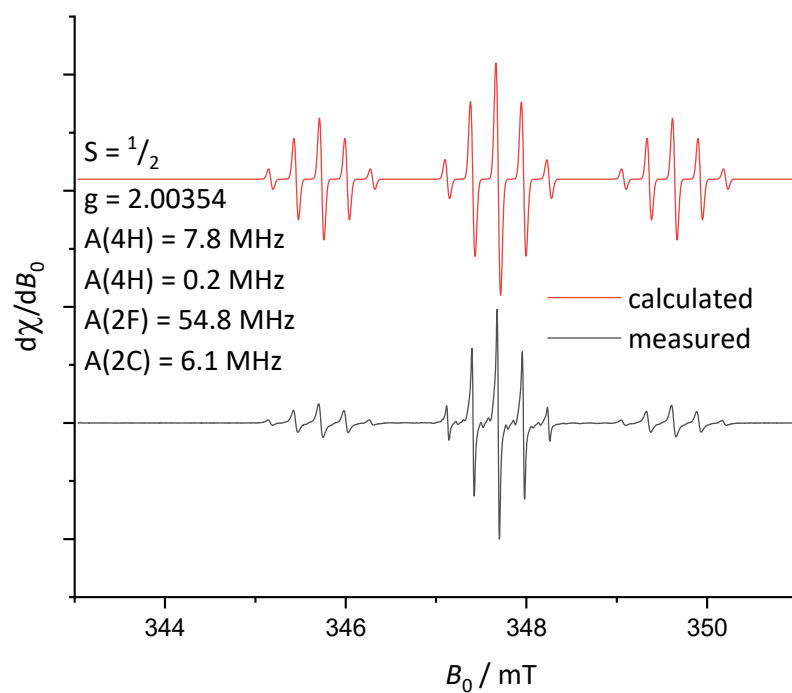

Figure S 44: Comparison of the measured EPR Spectrum of the reaction  $\text{XeF}_2/2\text{Li}[\text{Al}(\text{OR}^f)_4]$  in FB (black) with the calculated EPR spectrum of 4,4'-difluorobiphenyl (red).

### 6.3. 3,3',4,4'-Tetrafluorobiphenyl – Reaction of $\text{XeF}_2/2\text{Li}[\text{Al}(\text{OR}^{\text{F}})_4]$ with 1,2-Difluorobenzene

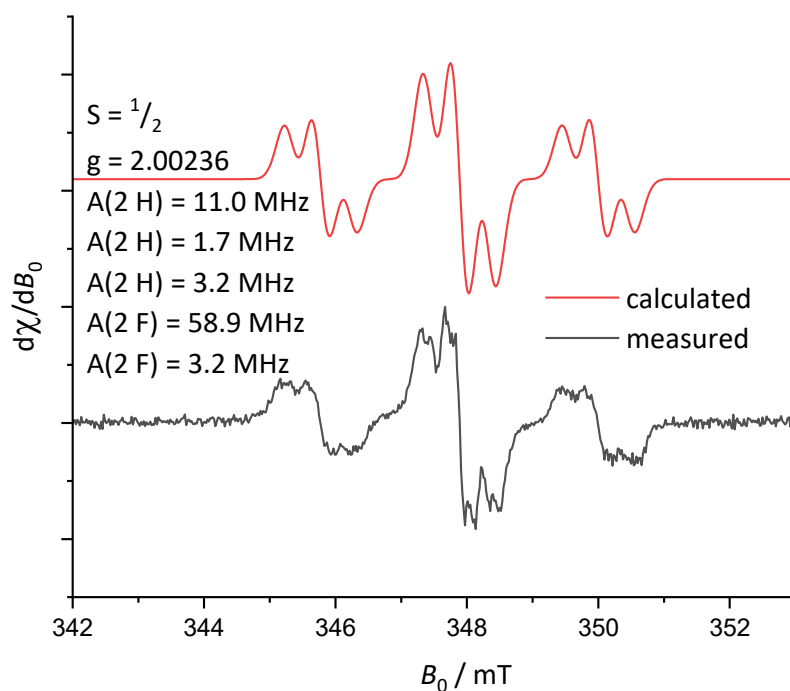

Figure S 45: Comparison of the measured EPR Spectrum of the reaction  $\text{XeF}_2/2\text{Li}[\text{Al}(\text{OR}^{\text{F}})_4]$  in 2FB (black) with the calculated EPR spectrum of 3,3',4,4'-tetrafluorobiphenyl (red).

## 7. Crystal Structures

### 7.1. [4,4'-difluorobiphenyl][ $\text{Al}(\text{OR}^{\text{F}})_4$ ]

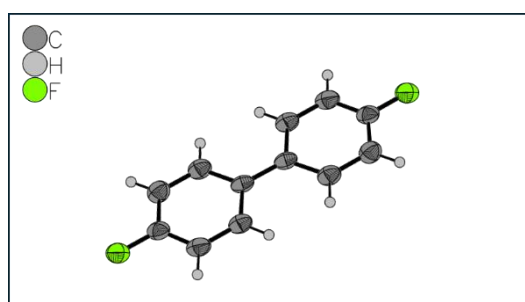

Figure S 46: Molecular structure of  $[\text{fbfb}][\text{Al}(\text{OR}^{\text{F}})_4]$ . Thermal displacement ellipsoids are shown at 50% probability. Counter ions are omitted for clarity. The measurement was carried out at 100 K.

Table S 1: Crystal data and summary of the data collection and refinement for  $[\text{fbfb}][\text{Al}(\text{OR}^{\text{F}})_4]$ .

| Compound             | $[\mathbf{1}][\text{Al}(\text{OR}^{\text{F}})_4]$ |
|----------------------|---------------------------------------------------|
| CCDC                 | 2531335                                           |
| Empirical formula    | $\text{C}_{28}\text{H}_8\text{AlF}_3\text{O}_4$   |
| Formula weight       | 1157.32                                           |
| Temperature [K]      | 100(2)                                            |
| Crystal system       | monoclinic                                        |
| Space group (number) | $C2/c$ (15)                                       |

|                                            |                                                                  |
|--------------------------------------------|------------------------------------------------------------------|
| $a$ [Å]                                    | 19.009(7)                                                        |
| $b$ [Å]                                    | 10.125(3)                                                        |
| $c$ [Å]                                    | 20.210(5)                                                        |
| $\alpha$ [°]                               | 90                                                               |
| $\beta$ [°]                                | 109.554(7)                                                       |
| $\gamma$ [°]                               | 90                                                               |
| Volume [Å <sup>3</sup> ]                   | 3665(2)                                                          |
| $Z$                                        | 4                                                                |
| $\rho_{\text{calc}}$ [gcm <sup>-3</sup> ]  | 2.097                                                            |
| $\mu$ [mm <sup>-1</sup> ]                  | 0.288                                                            |
| $F(000)$                                   | 2252                                                             |
| Crystal size [mm <sup>3</sup> ]            | 0.10×0.08×0.03                                                   |
| Crystal colour                             | blue                                                             |
| Crystal shape                              | block                                                            |
| Radiation                                  | MoK $\alpha$ ( $\lambda=0.71073$ Å)                              |
| 2 $\theta$ range [°]                       | 4.28 to 59.37 (0.72 Å)                                           |
| Index ranges                               | -26 ≤ $h$ ≤ 26<br>-13 ≤ $k$ ≤ 14<br>-28 ≤ $l$ ≤ 28               |
| Reflections collected                      | 86412                                                            |
| Independent reflections                    | 5141<br>$R_{\text{int}} = 0.0773$<br>$R_{\text{sigma}} = 0.0399$ |
| Completeness to<br>$\theta = 25.242^\circ$ | 100.0 %                                                          |
| Data / Restraints /<br>Parameters          | 5141 / 2159 / 448                                                |
| Absorption correction                      | 1.034                                                            |
| $T_{\text{min}}/T_{\text{max}}$ (method)   |                                                                  |
| Goodness-of-fit on $F^2$                   |                                                                  |
| Final $R$ indexes                          | $R_1 = 0.0407$                                                   |
| [ $I \geq 2\sigma(I)$ ]                    | $wR_2 = 0.0866$                                                  |
| Final $R$ indexes                          | $R_1 = 0.0809$                                                   |
| [all data]                                 | $wR_2 = 0.1017$                                                  |
| Largest peak/hole [eÅ <sup>-3</sup> ]      | 0.24/-0.27                                                       |

## 7.2. [Xe(C<sub>6</sub>F<sub>5</sub>)]FAl(OR<sup>F</sup>)<sub>3</sub> and [Xe(C<sub>6</sub>F<sub>5</sub>)]F(Al(OR<sup>F</sup>)<sub>3</sub>)<sub>2</sub>

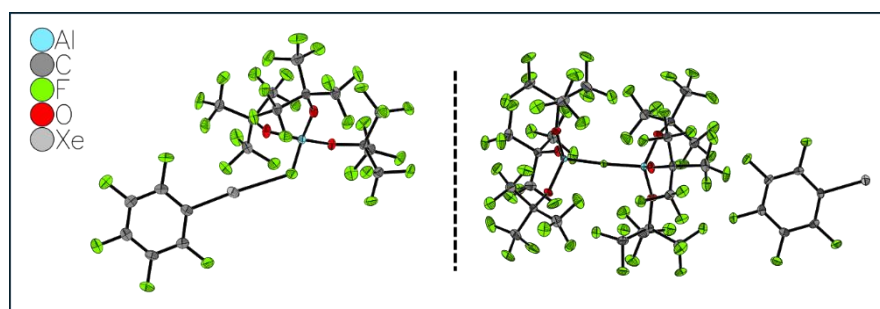

Figure S 47: Molecular structure of [Xe(C<sub>6</sub>F<sub>5</sub>)]FAl(OR<sup>F</sup>)<sub>3</sub> (left) and [Xe(C<sub>6</sub>F<sub>5</sub>)]F(Al(OR<sup>F</sup>)<sub>3</sub>)<sub>2</sub> (right). Thermal displacement ellipsoids are shown at 50% probability. The measurements were carried out at 100 K.

Table S 2: Crystal data and summary of the data collection and refinement for [Xe(C<sub>6</sub>F<sub>5</sub>)]FAl(OR<sup>F</sup>)<sub>3</sub> and [Xe(C<sub>6</sub>F<sub>5</sub>)]F(Al(OR<sup>F</sup>)<sub>3</sub>)<sub>2</sub>.

| Compound          | [Xe(C <sub>6</sub> F <sub>5</sub> )]FAl(OR <sup>F</sup> ) <sub>3</sub> | [Xe(C <sub>6</sub> F <sub>5</sub> )]F(Al(OR <sup>F</sup> ) <sub>3</sub> ) <sub>2</sub> |
|-------------------|------------------------------------------------------------------------|----------------------------------------------------------------------------------------|
| CCDC              | 2529885                                                                | 2529886                                                                                |
| Empirical formula | C <sub>18</sub> AlF <sub>33</sub> O <sub>3</sub> Xe                    | C <sub>30</sub> Al <sub>2</sub> F <sub>60</sub> O <sub>6</sub> Xe                      |

|                                                                 |                                                                                |                                                                                 |
|-----------------------------------------------------------------|--------------------------------------------------------------------------------|---------------------------------------------------------------------------------|
| Formula weight                                                  | 1049.46                                                                        | 1781.56                                                                         |
| Temperature [K]                                                 | 100(2)                                                                         | 100(2)                                                                          |
| Crystal system                                                  | orthorhombic                                                                   | monoclinic                                                                      |
| Space group (number)                                            | <i>Pbca</i> (61)                                                               | <i>P2<sub>1</sub>/n</i> (14)                                                    |
| <i>a</i> [Å]                                                    | 17.8570(18)                                                                    | 13.2484(7)                                                                      |
| <i>b</i> [Å]                                                    | 17.785(4)                                                                      | 16.7851(11)                                                                     |
| <i>c</i> [Å]                                                    | 18.0695(17)                                                                    | 44.788(3)                                                                       |
| $\alpha$ [°]                                                    | 90                                                                             | 90                                                                              |
| $\beta$ [°]                                                     | 90                                                                             | 95.969(2)                                                                       |
| $\gamma$ [°]                                                    | 90                                                                             | 90                                                                              |
| Volume [Å <sup>3</sup> ]                                        | 5738.5(15)                                                                     | 9905.8(10)                                                                      |
| <i>Z</i>                                                        | 8                                                                              | 8                                                                               |
| $\rho_{\text{calc}}$ [gcm <sup>-3</sup> ]                       | 2.429                                                                          | 2.389                                                                           |
| $\mu$ [mm <sup>-1</sup> ]                                       | 1.474                                                                          | 1.004                                                                           |
| <i>F</i> (000)                                                  | 3968                                                                           | 6784                                                                            |
| Crystal size [mm <sup>3</sup> ]                                 | 0.220×0.195×0.173                                                              | 0.276×0.230×0.175                                                               |
| Crystal colour                                                  | colourless                                                                     | colourless                                                                      |
| Crystal shape                                                   | block                                                                          | block                                                                           |
| Radiation                                                       | MoK $\alpha$ ( $\lambda$ =0.71073 Å)                                           | MoK $\alpha$ ( $\lambda$ =0.71073 Å)                                            |
| 2 $\theta$ range [°]                                            | 3.94 to 56.67 (0.75 Å)                                                         | 2.59 to 54.32 (0.78 Å)                                                          |
| Index ranges                                                    | -23 ≤ <i>h</i> ≤ 23<br>-23 ≤ <i>k</i> ≤ 23<br>-24 ≤ <i>l</i> ≤ 24              | -16 ≤ <i>h</i> ≤ 16<br>-21 ≤ <i>k</i> ≤ 21<br>-57 ≤ <i>l</i> ≤ 57               |
| Reflections collected                                           | 201923                                                                         | 122388                                                                          |
| Independent reflections                                         | 7143<br><i>R</i> <sub>int</sub> = 0.0524<br><i>R</i> <sub>sigma</sub> = 0.0119 | 21824<br><i>R</i> <sub>int</sub> = 0.0289<br><i>R</i> <sub>sigma</sub> = 0.0201 |
| Completeness to<br>$\theta$ = 25.242°                           | 99.9 %                                                                         | 99.5 %                                                                          |
| Data / Restraints /<br>Parameters                               | 7143/1731/505                                                                  | 21824/29515/2037                                                                |
| Goodness-of-fit on <i>F</i> <sup>2</sup>                        | 1.030                                                                          | 1.216                                                                           |
| Final <i>R</i> indexes<br>[ <i>I</i> ≥ 2 $\sigma$ ( <i>I</i> )] | <i>R</i> <sub>1</sub> = 0.0195<br><i>wR</i> <sub>2</sub> = 0.0474              | <i>R</i> <sub>1</sub> = 0.0537<br><i>wR</i> <sub>2</sub> = 0.1205               |
| Final <i>R</i> indexes<br>[all data]                            | <i>R</i> <sub>1</sub> = 0.0231<br><i>wR</i> <sub>2</sub> = 0.0493              | <i>R</i> <sub>1</sub> = 0.0559<br><i>wR</i> <sub>2</sub> = 0.1214               |
| Largest peak/hole [eÅ <sup>-3</sup> ]                           | 0.53/-0.58                                                                     | 1.39/-1.10                                                                      |

### 7.3. [(H<sub>2</sub>O)Xe(C<sub>6</sub>F<sub>5</sub>)] [Al(OR<sup>F</sup>)<sub>4</sub>]

During a procedure analogous to that used for preparation of [C<sub>6</sub>F<sub>5</sub>Xe][WCA] (with [WCA]<sup>-</sup> = [F-Al(OR<sup>F</sup>)<sub>3</sub>]<sup>-</sup>, [F(Al(OR<sup>F</sup>)<sub>3</sub>)<sub>2</sub>]<sup>-</sup>), Li[Al(OR<sup>F</sup>)<sub>4</sub>] was employed instead of Me<sub>3</sub>SiF-Al(OR<sup>F</sup>)<sub>3</sub>. Crystals suitable for scXRD were obtained and refined as [C<sub>6</sub>F<sub>5</sub>Xe(H<sub>2</sub>O)] [Al(OR<sup>F</sup>)<sub>4</sub>]. Notably, structural refinement with HF in place of H<sub>2</sub>O resulted in slightly increased R-values. Additionally, the experimentally observed Xe...X distance of 2.624(3) Å is closer to the calculated Xe...OH<sub>2</sub> distance (2.68 Å) than to the calculated Xe...FH distance (2.71 Å).

For comparison, recently characterized Xe(VI) hydrate complexes exhibit a similarly short Xe...O(H<sub>2</sub>O) contact, e.g. in [(18-crown-6)(H<sub>2</sub>O)XeO<sub>3</sub>]·H<sub>2</sub>O the Xe...O(H<sub>2</sub>O) the corresponding distance is 2.702(10) Å. However, the bonding situation in the present organoxenonium species is clearly different from that in XeO<sub>3</sub>.<sup>24</sup>

While the differences of the distances in the calculated structures are small, this trend is consistent with the assignment of the coordinated fragment as H<sub>2</sub>O rather than HF. However, as only scXRD data are available, independent verification by <sup>1</sup>H and <sup>19</sup>F NMR was not possible.

Interactions of xenon with water have been previously reported in the gas phase or in noble-gas matrices.<sup>25,26</sup> The present study therefore represents an rare example of xenon-water complex observed at room temperature in the solid state.

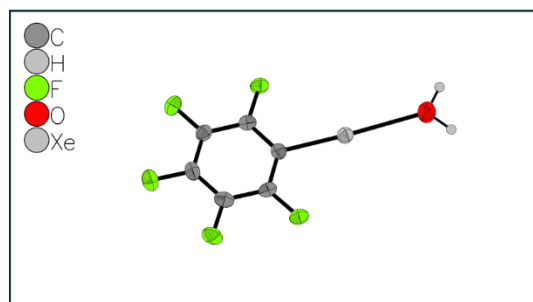

Figure S 48: Molecular structure of the cation in [(H<sub>2</sub>O)Xe(C<sub>6</sub>F<sub>5</sub>)] [Al(OR<sup>F</sup>)<sub>4</sub>]. Thermal displacement ellipsoids are shown at 50% probability. The counter ion is omitted for clarity. The measurement was carried out at 100 K.

Table S 3: Crystal data and summary of the data collection and refinement for [(H<sub>2</sub>O)Xe(C<sub>6</sub>F<sub>5</sub>)] [Al(OR<sup>F</sup>)<sub>4</sub>].

| Compound                                  | <b>[(H<sub>2</sub>O)Xe(C<sub>6</sub>F<sub>5</sub>)] [Al(OR<sup>F</sup>)<sub>4</sub>]</b> |
|-------------------------------------------|------------------------------------------------------------------------------------------|
| CCDC                                      | 2529884                                                                                  |
| Empirical formula                         | C <sub>22</sub> H <sub>2</sub> AlF <sub>41</sub> O <sub>5</sub> Xe                       |
| Formula weight                            | 1283.52                                                                                  |
| Temperature [K]                           | 100(2)                                                                                   |
| Crystal system                            | monoclinic                                                                               |
| Space group (number)                      | <i>P</i> 2 <sub>1</sub> / <i>n</i> (14)                                                  |
| <i>a</i> [Å]                              | 10.541(3)                                                                                |
| <i>b</i> [Å]                              | 20.426(6)                                                                                |
| <i>c</i> [Å]                              | 17.295(6)                                                                                |
| $\alpha$ [°]                              | 90                                                                                       |
| $\beta$ [°]                               | 97.644(10)                                                                               |
| $\gamma$ [°]                              | 90                                                                                       |
| Volume [Å <sup>3</sup> ]                  | 3690.6(19)                                                                               |
| <i>Z</i>                                  | 4                                                                                        |
| $\rho_{\text{calc}}$ [gcm <sup>-3</sup> ] | 2.310                                                                                    |
| $\mu$ [mm <sup>-1</sup> ]                 | 1.203                                                                                    |
| <i>F</i> (000)                            | 2440                                                                                     |
| Crystal size [mm <sup>3</sup> ]           | 0.075×0.098×0.116                                                                        |
| Crystal colour                            | colourless                                                                               |
| Crystal shape                             | block                                                                                    |
| Radiation                                 | MoK $\alpha$ ( $\lambda$ =0.71073 Å)                                                     |
| 2 $\theta$ range [°]                      | 3.10 to 52.81 (0.80 Å)                                                                   |
| Index ranges                              | -13 ≤ <i>h</i> ≤ 13<br>-25 ≤ <i>k</i> ≤ 25<br>-21 ≤ <i>l</i> ≤ 21                        |
| Reflections collected                     | 117085                                                                                   |
| Independent reflections                   | 7580<br><i>R</i> <sub>int</sub> = 0.0827<br><i>R</i> <sub>sigma</sub> = 0.0311           |
| Completeness to<br>$\theta$ = 25.242°     | 100.0 %                                                                                  |

|                                             |                   |
|---------------------------------------------|-------------------|
| Data / Restraints / Parameters              | 7580 / 3093 / 641 |
| Absorption correction                       | 0.5620 / 0.7454   |
| T <sub>min</sub> /T <sub>max</sub> (method) | (multi-scan)      |
| Goodness-of-fit on $F^2$                    | 1.115             |
| Final $R$ indexes                           | $R_1 = 0.0432$    |
| [ $I \geq 2\sigma(I)$ ]                     | $wR_2 = 0.1097$   |
| Final $R$ indexes                           | $R_1 = 0.0512$    |
| [all data]                                  | $wR_2 = 0.1158$   |
| Largest peak/hole [ $e\text{\AA}^{-3}$ ]    | 1.04/-1.29        |

## 8. IR Spectroscopy

### 8.1. $C_6F_5Xe-F-Al(OR^F)_3$

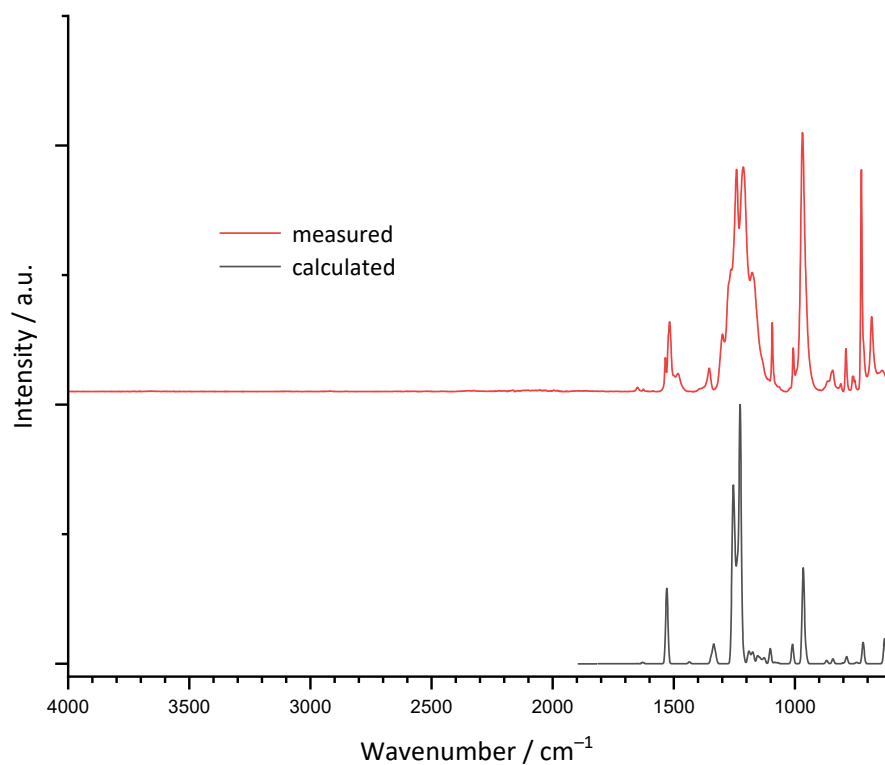

Figure S 49: Comparison of the experimental (red,  $C_6F_5Xe-F-Al(OR^F)_3$ ) and the calculated (black,  $C_6F_5Xe-F-Al(OR^F)_3$ , RI-r2scan-3c(D4)/def2-mTZVPP) IR spectra.

**FT-IR** (diamond, ATR): 1650 (vw), 1625 (vw), 1535 (vw), 1517 (w), 1483 (vw), 1354 (vw), 1299 (w), 1241 (vs), 1213 (vs), 1177 (m), 1093 (w), 1007 (w), 969 (vs), 864 (vw), 844 (vw), 789 (w), 762 (vw), 726 (vs), 683 (w), 640 (vw), 574 (vw), 566 (w), 536 (w), 491 (vw), 450 (w), 377 (w).

## 8.2. $[\text{C}_6\text{F}_5\text{Xe}][\text{F}(\text{Al}(\text{OR}^{\text{F}})_3)_2]$

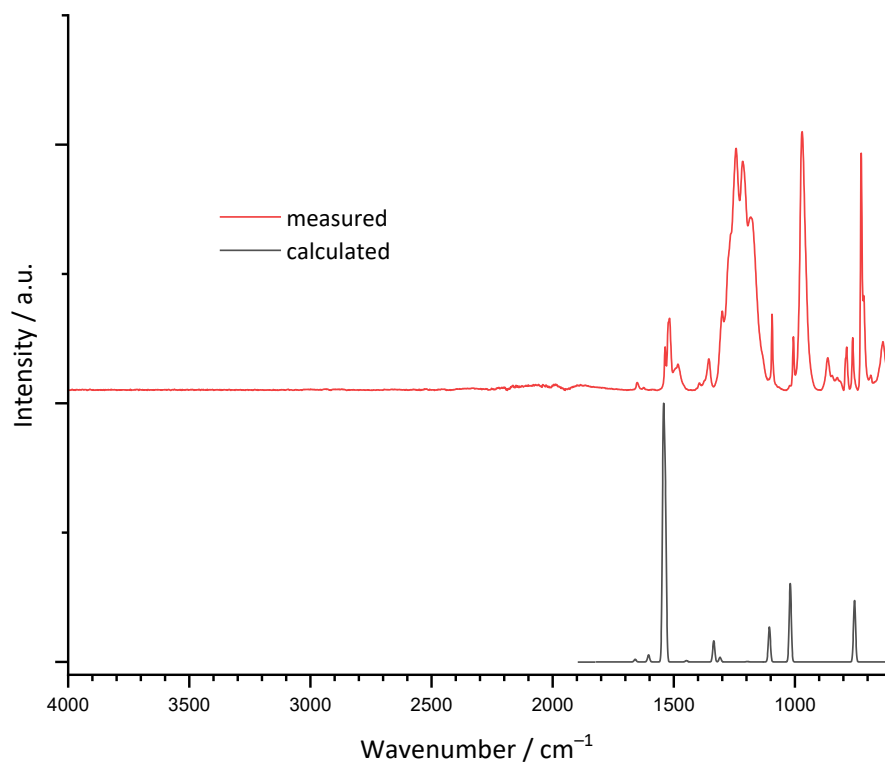

Figure S 50: Comparison of the experimental (red,  $[\text{C}_6\text{F}_5\text{Xe}][\text{F}(\text{Al}(\text{OR}^{\text{F}})_3)_2]$ ) and the calculated (black,  $[\text{C}_6\text{F}_5\text{Xe}]^+$ , RI-r2scan-3c(D4)/def2-mTZVPP) IR spectra. The IR bands of the anion can be compared with the anion bands from the IR spectrum of NO[al-f-al] (see ESI 8.3).

**FT-IR** (diamond, ATR): 1651 (vw), 1624 (vw), 1536 (vw), 1517 (w), 1490 (vw), 1394 (vw), 1355 (vw), 1300 (w), 1243 (vs), 1216 (vs), 1182 (s), 1094 (w), 1006 (w), 970 (vs), 864 (vw), 824 (vw), 786 (vw), 762 (w), 726 (vs), 716 (w), 687 (vw), 636 (vw), 571 (vw), 537 (w), 449 (w).

### 8.3. [NO][F(Al(OR<sup>F</sup>)<sub>3</sub>)<sub>2</sub>]

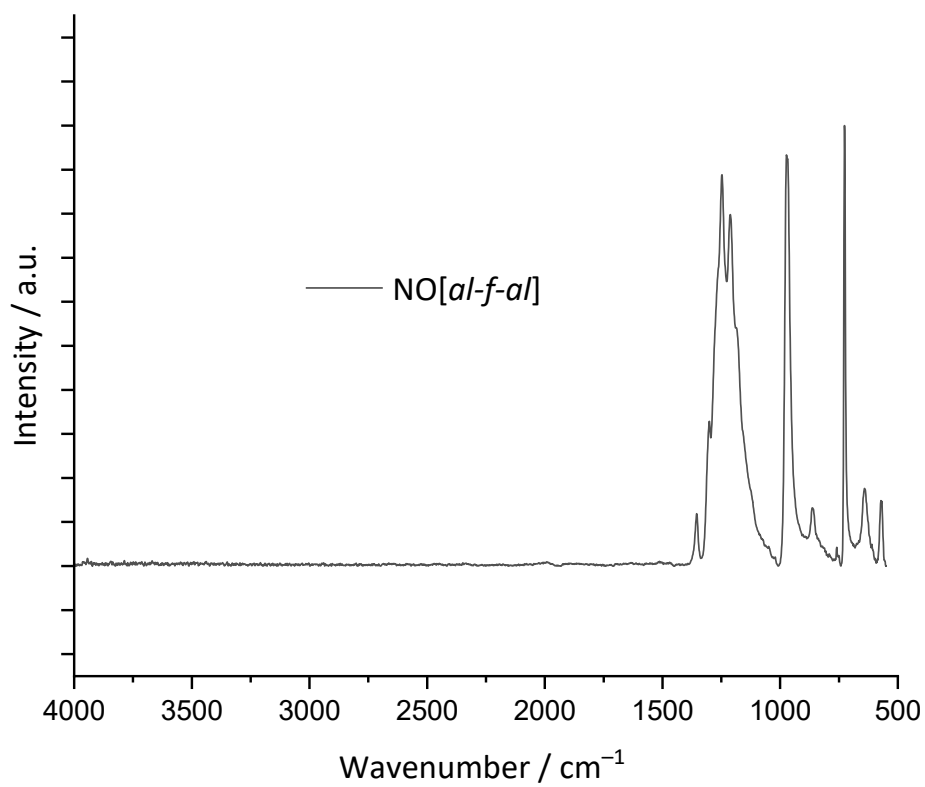

Figure S 51: IR spectrum of NO[F(Al(OR<sup>F</sup>)<sub>3</sub>)<sub>2</sub>].

**FT-IR** [ZnSe, ATR] = 1355 (vw), 1301 (w), 1247 (vs), 1212 (s), 1187 (m), 968 (vs), 863 (vw), 760 (vw), 726 (vs), 641 (vw), 572 (vw)

## 9. Quantum chemical Calculations

### 9.1. Benzene

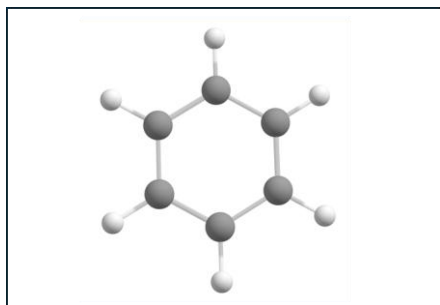

Total enthalpy: -232.07277391 Eh

Total entropy: 0.03283248 Eh

Final Gibbs free energy: -232.10560638 Eh

Cartesian coordinates in Ångström:

## Benzene

| atom | x-value  | y-value  | z-value  |
|------|----------|----------|----------|
| H    | -0.95896 | -0.81915 | 1.94909  |
| C    | -1.47411 | -0.37314 | 1.10416  |
| C    | -2.86046 | -0.24532 | 1.12254  |
| C    | -3.52126 | 0.32662  | 0.03867  |
| C    | -2.79577 | 0.77080  | -1.06356 |
| H    | -3.31098 | 1.21676  | -1.90849 |
| C    | -1.40944 | 0.64302  | -1.08197 |
| H    | -0.84382 | 0.98929  | -1.94130 |
| C    | -0.74861 | 0.07104  | 0.00193  |
| H    | 0.33215  | -0.02866 | -0.01253 |
| H    | -4.60203 | 0.42636  | 0.05302  |
| H    | -3.42597 | -0.59155 | 1.98193  |

9.2.  $[\text{C}_6\text{H}_5]^+$ 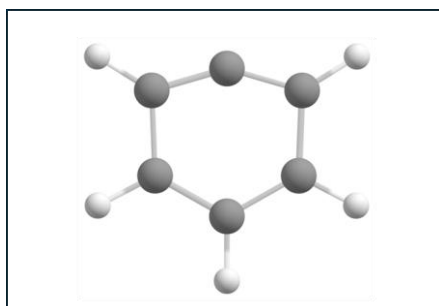

Total enthalpy: -231.10136330 Eh

Total entropy: 0.03343621 Eh

Final Gibbs free energy: -231.13479952 Eh

Cartesian coordinates in Ångström:

| $[\text{C}_6\text{H}_5]^+$ |          |          |          |
|----------------------------|----------|----------|----------|
| atom                       | x-value  | y-value  | z-value  |
| H                          | -1.00191 | -0.82728 | 1.97461  |
| C                          | -1.47591 | -0.37411 | 1.10661  |
| C                          | -2.90420 | -0.26537 | 1.17763  |
| C                          | -3.23654 | 0.30209  | 0.03557  |
| C                          | -2.83614 | 0.80106  | -1.11669 |
| H                          | -3.37973 | 1.24132  | -1.94276 |
| C                          | -1.41093 | 0.64436  | -1.08466 |
| H                          | -0.88515 | 1.00446  | -1.96637 |
| C                          | -0.76425 | 0.07194  | 0.00175  |
| H                          | 0.31545  | -0.02855 | -0.01293 |
| H                          | -3.49717 | -0.59998 | 2.01918  |

### 9.3. Biphenyl

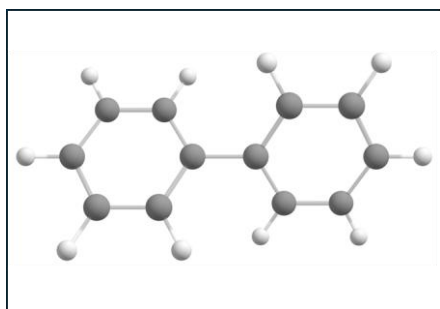

Total enthalpy: -462.98441400 Eh

Total entropy: 0.04327367 Eh

Final Gibbs free energy: -463.02768768 Eh

Cartesian coordinates in Ångström:

| Biphenyl |          |          |          |
|----------|----------|----------|----------|
| atom     | x-value  | y-value  | z-value  |
| H        | 3.55105  | 1.69730  | 0.75563  |
| C        | 2.93593  | 0.86776  | 0.42124  |
| C        | 1.55189  | 0.99364  | 0.41975  |
| H        | 1.09277  | 1.91309  | 0.76968  |
| C        | 0.73558  | -0.06662 | 0.00586  |
| C        | 1.34853  | -1.25634 | -0.40722 |
| H        | 0.73240  | -2.07819 | -0.75873 |
| C        | 2.73267  | -1.38127 | -0.40654 |
| H        | 3.18912  | -2.30793 | -0.74014 |
| C        | 3.53247  | -0.32011 | 0.00802  |
| H        | -1.09277 | -1.91309 | 0.76968  |
| C        | -1.55189 | -0.99364 | 0.41975  |
| C        | -2.93593 | -0.86776 | 0.42124  |
| H        | -3.55105 | -1.69730 | 0.75563  |
| C        | -3.53247 | 0.32010  | 0.00802  |
| C        | -2.73267 | 1.38127  | -0.40654 |
| H        | -3.18912 | 2.30793  | -0.74014 |
| C        | -1.34853 | 1.25634  | -0.40722 |
| H        | -0.73240 | 2.07819  | -0.75873 |
| C        | -0.73558 | 0.06662  | 0.00586  |
| H        | -4.61311 | 0.41814  | 0.00896  |
| H        | 4.61310  | -0.41814 | 0.00896  |

### 9.4. [Biphenyl]<sup>+</sup>

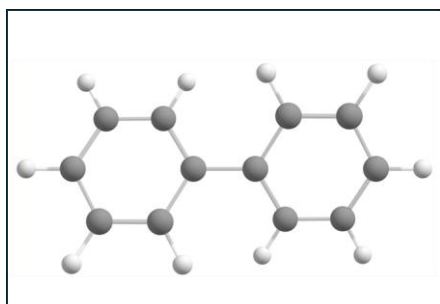

Total enthalpy: -462.69680360 Eh

Total entropy: 0.04442741 Eh

Final Gibbs free energy: -462.74123101 Eh

Cartesian coordinates in Ångström:

| [Biphenyl] <sup>+</sup> |          |          |          |
|-------------------------|----------|----------|----------|
| atom                    | x-value  | y-value  | z-value  |
| H                       | 3.54987  | 1.78786  | 0.48519  |
| C                       | 2.92205  | 0.93101  | 0.26822  |
| C                       | 1.55368  | 1.06279  | 0.25720  |
| H                       | 1.11074  | 2.02290  | 0.49163  |
| C                       | 0.71712  | -0.06499 | 0.00842  |
| C                       | 1.33717  | -1.32474 | -0.24125 |
| H                       | 0.72872  | -2.19001 | -0.47378 |
| C                       | 2.70697  | -1.44054 | -0.25523 |
| H                       | 3.17043  | -2.39612 | -0.47319 |
| C                       | 3.50908  | -0.31753 | 0.00542  |
| H                       | -1.11074 | -2.02290 | 0.49163  |
| C                       | -1.55368 | -1.06279 | 0.25720  |
| C                       | -2.92206 | -0.93101 | 0.26822  |
| H                       | -3.54987 | -1.78786 | 0.48519  |
| C                       | -3.50908 | 0.31753  | 0.00542  |
| C                       | -2.70697 | 1.44054  | -0.25523 |
| H                       | -3.17043 | 2.39612  | -0.47318 |
| C                       | -1.33717 | 1.32474  | -0.24125 |
| H                       | -0.72872 | 2.19001  | -0.47378 |
| C                       | -0.71712 | 0.06499  | 0.00842  |
| H                       | -4.58981 | 0.41524  | 0.00403  |
| H                       | 4.58981  | -0.41524 | 0.00402  |

### 9.5. [C<sub>6</sub>H<sub>6</sub>-C<sub>6</sub>H<sub>5</sub>]<sup>+</sup>

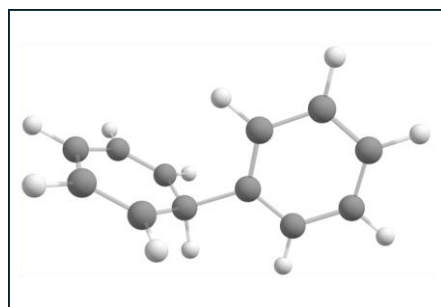

Total enthalpy: -463.26944713 Eh

Total entropy: 0.04556198 Eh

Final Gibbs free energy: -463.31500911 Eh

Cartesian coordinates in Ångström:

| [C <sub>6</sub> H <sub>6</sub> -C <sub>6</sub> H <sub>5</sub> ] <sup>+</sup> |          |         |         |
|------------------------------------------------------------------------------|----------|---------|---------|
| atom                                                                         | x-value  | y-value | z-value |
| C                                                                            | -3.79234 | 2.04070 | 1.42748 |
| C                                                                            | -4.40165 | 2.42627 | 0.21999 |
| C                                                                            | -2.96514 | 0.95065 | 1.43468 |

|   |          |          |          |
|---|----------|----------|----------|
| C | -4.18692 | 1.74802  | -0.99327 |
| C | -2.71562 | 0.17042  | 0.21772  |
| C | -3.36288 | 0.65565  | -1.00611 |
| C | -3.01029 | -1.33952 | 0.44959  |
| H | -4.67856 | 2.08935  | -1.89722 |
| H | -3.17876 | 0.09930  | -1.92093 |
| C | -4.32483 | -1.72506 | 0.71061  |
| C | -1.98517 | -2.27844 | 0.39913  |
| C | -2.28376 | -3.62137 | 0.61358  |
| C | -4.61085 | -3.06873 | 0.92311  |
| C | -3.59168 | -4.01572 | 0.87483  |
| H | -5.63172 | -3.37351 | 1.12668  |
| H | -0.96204 | -1.97744 | 0.19583  |
| H | -1.48787 | -4.35723 | 0.57530  |
| H | -5.12053 | -0.98614 | 0.74867  |
| H | -3.98865 | 2.60095  | 2.33458  |
| H | -2.48291 | 0.61514  | 2.34859  |
| H | -1.62146 | 0.19958  | 0.03599  |
| H | -3.81792 | -5.06316 | 1.04129  |
| H | -5.06651 | 3.28643  | 0.22427  |

## 9.6. Fluorobenzene

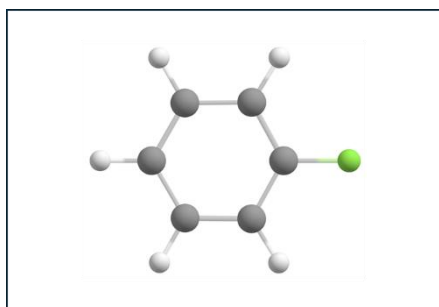

Total enthalpy: -331.32508168 Eh

Total entropy: 0.03496424 Eh

Final Gibbs free energy: -331.36004592 Eh

Cartesian coordinates in Ångström:

| Fluorobenzene |          |          |          |
|---------------|----------|----------|----------|
| atom          | x-value  | y-value  | z-value  |
| H             | -0.96509 | -0.81908 | 1.95000  |
| C             | -1.47759 | -0.37276 | 1.10411  |
| C             | -2.86394 | -0.24973 | 1.13300  |
| C             | -3.49418 | 0.32325  | 0.04065  |
| F             | -4.84121 | 0.44716  | 0.05966  |
| C             | -2.80082 | 0.77458  | -1.07034 |
| H             | -3.34147 | 1.21586  | -1.89987 |
| C             | -1.41500 | 0.64292  | -1.08053 |
| H             | -0.85362 | 0.99047  | -1.94164 |
| C             | -0.75150 | 0.07126  | 0.00205  |
| H             | -3.45236 | -0.58713 | 1.97857  |
| H             | 0.32827  | -0.02803 | -0.01322 |

### 9.7. [C<sub>6</sub>H<sub>4</sub>F]<sup>+</sup>

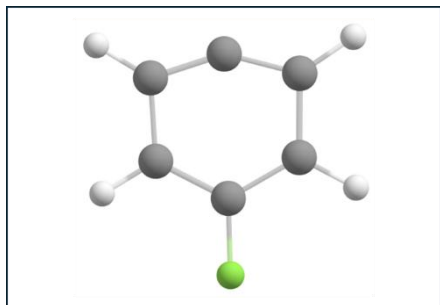

Total enthalpy: -330.33789001 Eh

Total entropy: 0.03586418 Eh

Final Gibbs free energy: -330.37375418 Eh

Cartesian coordinates in Ångström:

| Name |          |          |          |
|------|----------|----------|----------|
| atom | x-value  | y-value  | z-value  |
| H    | -0.99647 | -0.82650 | 1.97286  |
| C    | -1.50385 | -0.37842 | 1.12171  |
| C    | -2.92141 | -0.26566 | 1.18130  |
| C    | -3.25167 | 0.30566  | 0.03677  |
| C    | -2.85306 | 0.80405  | -1.12011 |
| H    | -3.40795 | 1.24229  | -1.94087 |
| C    | -1.43790 | 0.65376  | -1.09911 |
| H    | -0.87983 | 1.00352  | -1.96452 |
| C    | -0.80675 | 0.07559  | 0.00217  |
| F    | 0.50772  | -0.04731 | -0.01576 |
| H    | -3.52529 | -0.59704 | 2.01748  |

### 9.8. 4,4'-Difluorobiphenyl

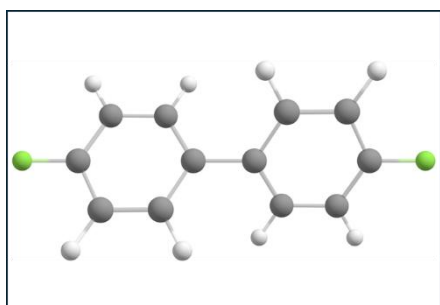

Total enthalpy: -661.48799310 Eh

Total entropy: 0.04705489 Eh

Final Gibbs free energy: -661.53504798 Eh

Cartesian coordinates in Ångström:

| 4,4'-Difluorobiphenyl |         |         |         |
|-----------------------|---------|---------|---------|
| atom                  | x-value | y-value | z-value |

|   |          |          |          |
|---|----------|----------|----------|
| H | 3.57531  | 1.68818  | 0.75623  |
| C | 2.93703  | 0.87682  | 0.42520  |
| C | 1.55239  | 0.99234  | 0.42208  |
| H | 1.09669  | 1.91190  | 0.77517  |
| C | 0.73523  | -0.06659 | 0.00594  |
| C | 1.34923  | -1.25515 | -0.40945 |
| H | 0.73642  | -2.07769 | -0.76412 |
| C | 2.73211  | -1.39037 | -0.41052 |
| H | 3.21455  | -2.30329 | -0.74086 |
| C | 3.50081  | -0.31722 | 0.00795  |
| F | 4.84696  | -0.43931 | 0.00902  |
| H | -1.09669 | -1.91190 | 0.77517  |
| C | -1.55239 | -0.99234 | 0.42208  |
| C | -2.93703 | -0.87682 | 0.42520  |
| H | -3.57531 | -1.68818 | 0.75623  |
| C | -3.50081 | 0.31722  | 0.00795  |
| F | -4.84696 | 0.43931  | 0.00902  |
| C | -2.73211 | 1.39037  | -0.41051 |
| H | -3.21455 | 2.30329  | -0.74086 |
| C | -1.34923 | 1.25515  | -0.40945 |
| H | -0.73642 | 2.07769  | -0.76412 |
| C | -0.73523 | 0.06659  | 0.00594  |

### 9.9. [4,4'-Difluorobiphenyl]<sup>+</sup>

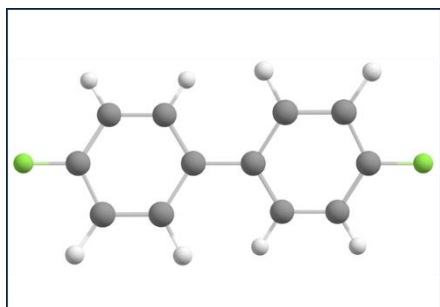

Total enthalpy: -661.20091933 Eh

Total entropy: 0.04810768 Eh

Final Gibbs free energy: -661.24902702 Eh

Cartesian coordinates in Ångström:

| [4,4'-Difluorobiphenyl] <sup>+</sup> |          |          |          |
|--------------------------------------|----------|----------|----------|
| atom                                 | x-value  | y-value  | z-value  |
| H                                    | 3.57173  | 1.78228  | 0.48499  |
| C                                    | 2.92126  | 0.94216  | 0.26987  |
| C                                    | 1.55408  | 1.06107  | 0.25854  |
| H                                    | 1.11372  | 2.02195  | 0.49482  |
| C                                    | 0.71739  | -0.06502 | 0.00805  |
| C                                    | 1.33794  | -1.32312 | -0.24311 |
| H                                    | 0.73196  | -2.18958 | -0.47784 |
| C                                    | 2.70425  | -1.45145 | -0.25663 |
| H                                    | 3.19309  | -2.39467 | -0.47241 |
| C                                    | 3.48054  | -0.31500 | 0.00581  |
| F                                    | 4.79384  | -0.43379 | 0.00455  |
| H                                    | -1.11372 | -2.02195 | 0.49482  |

|   |          |          |          |
|---|----------|----------|----------|
| C | -1.55408 | -1.06107 | 0.25854  |
| C | -2.92126 | -0.94216 | 0.26987  |
| H | -3.57173 | -1.78228 | 0.48499  |
| C | -3.48054 | 0.31500  | 0.00581  |
| F | -4.79384 | 0.43378  | 0.00455  |
| C | -2.70425 | 1.45145  | -0.25663 |
| H | -3.19309 | 2.39467  | -0.47241 |
| C | -1.33794 | 1.32312  | -0.24311 |
| H | -0.73196 | 2.18958  | -0.47784 |
| C | -0.71739 | 0.06502  | 0.00805  |

### 9.10. [C<sub>6</sub>H<sub>5</sub>F-C<sub>6</sub>H<sub>4</sub>F]<sup>+</sup>

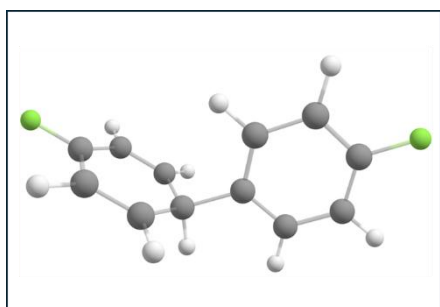

Total enthalpy: -661.77346756 Eh

Total entropy: 0.04917045 Eh

Final Gibbs free energy: -661.82263801 Eh

Cartesian coordinates in Ångström:

| [C <sub>6</sub> H <sub>5</sub> F-C <sub>6</sub> H <sub>4</sub> F] <sup>+</sup> |          |          |          |
|--------------------------------------------------------------------------------|----------|----------|----------|
| atom                                                                           | x-value  | y-value  | z-value  |
| C                                                                              | -3.79764 | 2.02486  | 1.44446  |
| C                                                                              | -4.39713 | 2.39019  | 0.22323  |
| C                                                                              | -2.96201 | 0.95075  | 1.43663  |
| C                                                                              | -4.19344 | 1.73097  | -1.00497 |
| C                                                                              | -2.70024 | 0.16984  | 0.21498  |
| C                                                                              | -3.35758 | 0.65707  | -1.01025 |
| C                                                                              | -3.00558 | -1.32980 | 0.44678  |
| H                                                                              | -4.70391 | 2.09095  | -1.89147 |
| H                                                                              | -3.16816 | 0.10709  | -1.92772 |
| F                                                                              | -5.20250 | 3.41858  | 0.22989  |
| C                                                                              | -4.32167 | -1.71507 | 0.70983  |
| C                                                                              | -1.98691 | -2.27901 | 0.39708  |
| C                                                                              | -2.27961 | -3.62016 | 0.61140  |
| C                                                                              | -4.62469 | -3.05177 | 0.92538  |
| C                                                                              | -3.59382 | -3.98067 | 0.87230  |
| F                                                                              | -3.87847 | -5.26823 | 1.08121  |
| H                                                                              | -5.63690 | -3.37951 | 1.13226  |
| H                                                                              | -0.96189 | -1.98554 | 0.19278  |
| H                                                                              | -1.50744 | -4.38018 | 0.57923  |
| H                                                                              | -5.11755 | -0.97645 | 0.74884  |
| H                                                                              | -4.02036 | 2.59816  | 2.33759  |
| H                                                                              | -2.47627 | 0.62025  | 2.35039  |
| H                                                                              | -1.60805 | 0.20801  | 0.03409  |

### 9.11. 1,2-Difluorobenzene

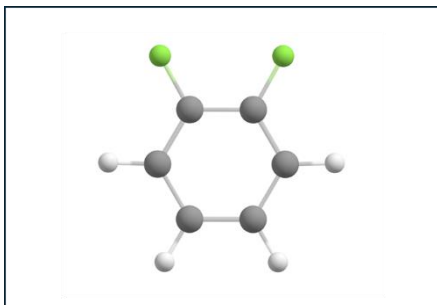

Method: (RI-)r2scan-3c(D4)/def2-mTZVPP

Total enthalpy: -430.56952670 Eh

Total entropy: 0.03711345 Eh

Final Gibbs free energy: -430.60664015 Eh

Cartesian coordinates in Ångström:

$o\text{-C}_6\text{H}_4\text{F}_2$

| atom | x-value  | y-value  | z-value  |
|------|----------|----------|----------|
| H    | -0.97132 | -0.81761 | 1.94793  |
| C    | -1.46002 | -0.36865 | 1.09038  |
| C    | -2.83740 | -0.23638 | 1.09860  |
| C    | -3.49870 | 0.33444  | 0.01624  |
| F    | -4.83722 | 0.44898  | 0.05384  |
| C    | -2.78947 | 0.77995  | -1.08528 |
| H    | -3.33198 | 1.22141  | -1.91392 |
| C    | -1.40274 | 0.64986  | -1.09842 |
| H    | -0.84242 | 0.99795  | -1.95892 |
| C    | -0.74130 | 0.07805  | -0.01606 |
| F    | -3.55409 | -0.65620 | 2.15515  |
| H    | 0.33816  | -0.02301 | -0.02711 |

### 9.12. $[\text{C}_6\text{H}_3\text{F}_2]^+$

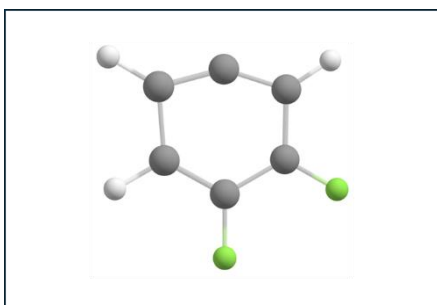

Method: (RI-)r2scan-3c(D4)/def2-mTZVPP

Total enthalpy: -429.57286920 Eh

Total entropy: 0.03939743 Eh

Final Gibbs free energy: -429.61226663 Eh

Cartesian coordinates in Ångström:

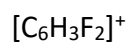

| atom | x-value  | y-value  | z-value  |
|------|----------|----------|----------|
| F    | -0.89097 | -0.91619 | 2.13400  |
| C    | -1.50628 | -0.37617 | 1.11824  |
| C    | -2.91863 | -0.25018 | 1.15146  |
| C    | -3.26750 | 0.32045  | 0.00593  |
| C    | -2.88878 | 0.82179  | -1.14884 |
| H    | -3.41178 | 1.26613  | -1.98491 |
| C    | -1.46600 | 0.64838  | -1.08262 |
| H    | -0.90912 | 0.99951  | -1.95106 |
| C    | -0.79961 | 0.08041  | -0.00928 |
| F    | 0.51016  | -0.04196 | -0.02766 |
| H    | -3.52797 | -0.58223 | 1.98667  |

### 9.13. 3,3',4,4'-Tetrafluorobiphenyl

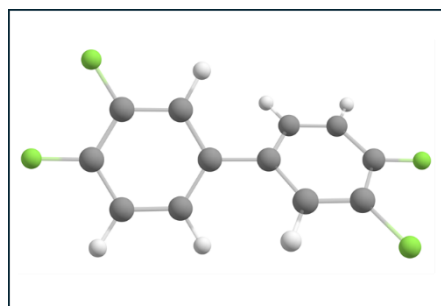

Method: (RI)-r2scan-3c(D4)/def2-mTZVPP

Total enthalpy: -859.97655579 Eh

Total entropy: 0.05166182 Eh

Final Gibbs free energy: -860.02821760 Eh

Cartesian coordinates in Ångström:

#### 3,3',4,4'-Tetrafluorobiphenyl

| atom | x-value  | y-value  | z-value  |
|------|----------|----------|----------|
| H    | 3.46650  | 0.24262  | 2.02807  |
| C    | 2.87371  | 0.05230  | 1.14031  |
| C    | 1.48875  | 0.17094  | 1.15019  |
| H    | 0.99013  | 0.47968  | 2.06236  |
| C    | 0.73535  | -0.06346 | -0.00613 |
| C    | 1.40366  | -0.42178 | -1.18416 |
| H    | 0.86106  | -0.64596 | -2.09591 |
| C    | 2.78050  | -0.53401 | -1.18870 |
| F    | 3.42496  | -0.88705 | -2.31291 |
| C    | 3.51709  | -0.30072 | -0.03236 |
| F    | 4.85357  | -0.42098 | -0.06849 |
| H    | -0.99461 | -0.84452 | 1.96111  |
| C    | -1.47466 | -0.37021 | 1.11224  |
| C    | -2.84953 | -0.23603 | 1.11927  |
| F    | -3.56320 | -0.66144 | 2.17448  |
| C    | -3.51496 | 0.32505  | 0.03463  |
| F    | -4.85203 | 0.43881  | 0.07052  |

|   |          |         |          |
|---|----------|---------|----------|
| C | -2.80087 | 0.76124 | -1.06698 |
| H | -3.33667 | 1.20835 | -1.89691 |
| C | -1.41674 | 0.63321 | -1.07804 |
| H | -0.85694 | 1.00645 | -1.92851 |
| C | -0.73507 | 0.06752 | 0.00593  |

#### 9.14. [3,3',4,4'-Tetrafluorobiphenyl]<sup>+</sup>

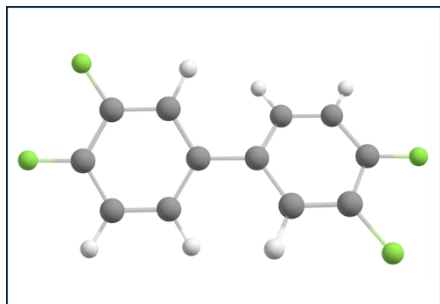

Method: (RI-)r2scan-3c(D4)/def2-mTZVPP

Total enthalpy: -859.68033455 Eh

Total entropy: 0.05266314 Eh

Final Gibbs free energy: -859.73299769 Eh

Cartesian coordinates in Ångström:

#### [3,3',4,4'-tetrafluorobiphenyl]<sup>+</sup>

| atom | x-value  | y-value  | z-value  |
|------|----------|----------|----------|
| H    | 3.43683  | 0.02098  | 2.09105  |
| C    | 2.84754  | -0.07508 | 1.18597  |
| C    | 1.47607  | 0.02651  | 1.19181  |
| H    | 0.97387  | 0.23397  | 2.12850  |
| C    | 0.71894  | -0.07075 | -0.01439 |
| C    | 1.40252  | -0.28468 | -1.23440 |
| H    | 0.87946  | -0.41275 | -2.17423 |
| C    | 2.76723  | -0.40544 | -1.23418 |
| F    | 3.43454  | -0.63920 | -2.34944 |
| C    | 3.49847  | -0.29757 | -0.02709 |
| F    | 4.80462  | -0.41010 | -0.07293 |
| H    | -0.97334 | -0.62947 | 2.08047  |
| C    | -1.45031 | -0.24622 | 1.18664  |
| C    | -2.81464 | -0.12159 | 1.18668  |
| F    | -3.53073 | -0.42705 | 2.25341  |
| C    | -3.49583 | 0.32613  | 0.02955  |
| F    | -4.80187 | 0.43989  | 0.07541  |
| C    | -2.79651 | 0.64157  | -1.13501 |
| H    | -3.34500 | 0.99937  | -1.99921 |
| C    | -1.42879 | 0.49844  | -1.14451 |
| H    | -0.88273 | 0.77678  | -2.03724 |
| C    | -0.72033 | 0.05626  | 0.01315  |

### 9.15. [C<sub>6</sub>F<sub>2</sub>H<sub>4</sub>-C<sub>6</sub>H<sub>3</sub>F<sub>2</sub>]<sup>+</sup>

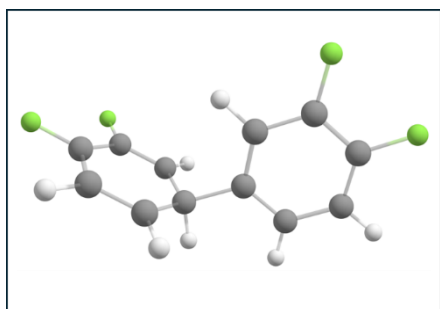

Method: (RI-)r2scan-3c(D4)/def2-mTZVPP

Total enthalpy: -860.24948305 Eh

Total entropy: 0.05313709 Eh

Final Gibbs free energy: -860.30262015 Eh

Cartesian coordinates in Ångström:

| [C <sub>6</sub> F <sub>2</sub> H <sub>4</sub> -C <sub>6</sub> H <sub>3</sub> F <sub>2</sub> ] <sup>+</sup> |          |          |          |
|------------------------------------------------------------------------------------------------------------|----------|----------|----------|
| atom                                                                                                       | x-value  | y-value  | z-value  |
| C                                                                                                          | -3.78386 | 2.03881  | 1.40963  |
| C                                                                                                          | -4.38231 | 2.42114  | 0.17848  |
| C                                                                                                          | -2.97152 | 0.95314  | 1.44602  |
| C                                                                                                          | -4.17116 | 1.73499  | -1.02878 |
| C                                                                                                          | -2.71398 | 0.16438  | 0.22795  |
| C                                                                                                          | -3.35447 | 0.64407  | -1.00806 |
| C                                                                                                          | -3.00065 | -1.33924 | 0.45114  |
| H                                                                                                          | -4.66437 | 2.09217  | -1.92668 |
| H                                                                                                          | -3.16400 | 0.07823  | -1.91536 |
| F                                                                                                          | -5.16075 | 3.46091  | 0.18769  |
| C                                                                                                          | -4.31202 | -1.72941 | 0.73112  |
| C                                                                                                          | -1.97738 | -2.27776 | 0.37072  |
| C                                                                                                          | -2.26070 | -3.62547 | 0.57541  |
| C                                                                                                          | -4.58121 | -3.07088 | 0.93314  |
| C                                                                                                          | -3.55785 | -4.01753 | 0.85576  |
| F                                                                                                          | -3.84870 | -5.29738 | 1.05785  |
| F                                                                                                          | -5.82143 | -3.46786 | 1.20474  |
| H                                                                                                          | -0.95789 | -1.97676 | 0.15393  |
| H                                                                                                          | -1.48300 | -4.37931 | 0.52292  |
| H                                                                                                          | -5.13125 | -1.02047 | 0.80073  |
| F                                                                                                          | -4.06584 | 2.76138  | 2.47903  |
| H                                                                                                          | -2.51687 | 0.63948  | 2.38148  |
| H                                                                                                          | -1.62067 | 0.21371  | 0.04510  |

### 9.16. 1,2,3-Trifluorobenzene

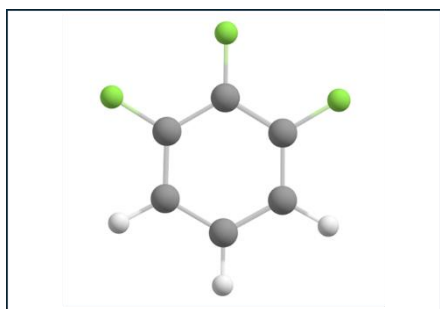

Method: (RI)-r2scan-3c(D4)/def2-mTZVPP

Total enthalpy: -529.81306281 Eh

Total entropy: 0.03926182 Eh

Final Gibbs free energy: -529.85232463 Eh

Cartesian coordinates in Ångström:

| 1,2,3-Trifluorobenzene |          |          |          |
|------------------------|----------|----------|----------|
| atom                   | x-value  | y-value  | z-value  |
| F                      | -0.86149 | -0.90691 | 2.10923  |
| C                      | -1.47687 | -0.35029 | 1.05485  |
| C                      | -2.86167 | -0.22896 | 1.08907  |
| C                      | -3.50863 | 0.34387  | -0.00041 |
| F                      | -4.84505 | 0.45607  | 0.04121  |
| C                      | -2.80046 | 0.79007  | -1.10377 |
| H                      | -3.34114 | 1.23094  | -1.93289 |
| C                      | -1.41511 | 0.65827  | -1.11268 |
| H                      | -0.85118 | 1.00463  | -1.97101 |
| C                      | -0.74374 | 0.08783  | -0.03541 |
| F                      | -3.55718 | -0.65272 | 2.14817  |
| H                      | 0.33400  | -0.02402 | -0.02392 |

### 9.17. [C<sub>6</sub>H<sub>2</sub>F<sub>3</sub>]<sup>+</sup>

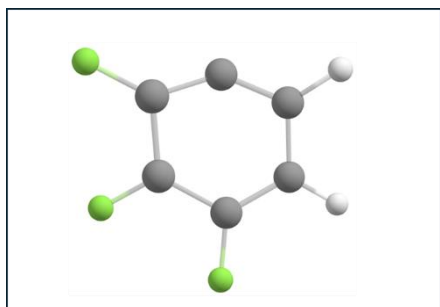

Total enthalpy: -528.78971400 Eh

Total entropy: 0.03959937 Eh

Final Gibbs free energy: -528.82931337 Eh

Cartesian coordinates in Ångström:

[C<sub>6</sub>H<sub>2</sub>F<sub>3</sub>]<sup>+</sup>

| atom | x-value  | y-value  | z-value  |
|------|----------|----------|----------|
| F    | -0.95264 | -0.94947 | 1.99609  |
| C    | -1.54667 | -0.21657 | 1.10057  |
| C    | -2.97162 | -0.12796 | 1.19174  |
| C    | -3.35461 | 0.09470  | -0.07793 |
| C    | -2.80086 | 0.70642  | -1.12771 |
| H    | -3.34010 | 1.43928  | -1.73101 |
| C    | -1.39327 | 0.55715  | -1.23758 |
| H    | -0.83014 | 0.94283  | -2.08056 |
| C    | -0.78955 | 0.14959  | -0.06938 |
| F    | 0.50896  | 0.03815  | 0.03929  |
| F    | -3.60597 | -0.66416 | 2.18840  |

### 9.18. 2,2',3,3',4,4'-Hexafluorobiphenyl

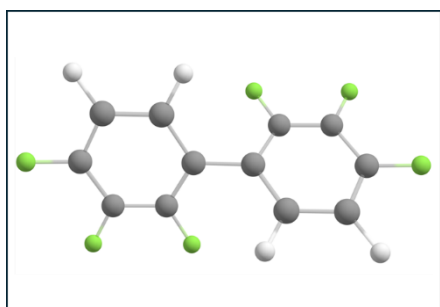

Total enthalpy: -1058.45988589 Eh

Total entropy: 0.05493615 Eh

Final Gibbs free energy: -1058.51482203 Eh

Cartesian coordinates in Ångström:

| 2,2',3,3',4,4'-Hexafluorobiphenyl |          |          |          |
|-----------------------------------|----------|----------|----------|
| atom                              | x-value  | y-value  | z-value  |
| C                                 | 2.85787  | -1.09039 | 0.51863  |
| C                                 | 1.46994  | -1.09051 | 0.50311  |
| H                                 | 0.93372  | -1.94544 | 0.89696  |
| C                                 | 0.73771  | -0.00631 | 0.00399  |
| C                                 | 1.45866  | 1.08237  | -0.48882 |
| F                                 | 0.82626  | 2.14411  | -1.01196 |
| C                                 | 2.84812  | 1.10350  | -0.48184 |
| F                                 | 3.50650  | 2.15931  | -0.96727 |
| C                                 | 3.53827  | 0.01004  | 0.02567  |
| F                                 | 4.87801  | 0.04429  | 0.02885  |
| F                                 | -0.82626 | -2.14411 | -1.01196 |
| C                                 | -1.45866 | -1.08237 | -0.48882 |
| C                                 | -2.84812 | -1.10350 | -0.48184 |
| F                                 | -3.50650 | -2.15931 | -0.96727 |
| C                                 | -3.53827 | -0.01004 | 0.02567  |
| F                                 | -4.87801 | -0.04429 | 0.02886  |
| C                                 | -2.85787 | 1.09039  | 0.51863  |
| C                                 | -1.46994 | 1.09051  | 0.50311  |
| H                                 | -0.93372 | 1.94544  | 0.89697  |
| C                                 | -0.73771 | 0.00631  | 0.00399  |
| H                                 | -3.42217 | 1.92771  | 0.91180  |
| H                                 | 3.42217  | -1.92771 | 0.91179  |

### 9.19. [2,2',3,3',4,4'-Hexafluorobiphenyl]<sup>+</sup>

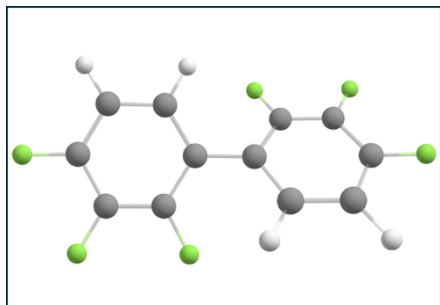

Total enthalpy: -1058.15431452 Eh

Total entropy: 0.05569348 Eh

Final Gibbs free energy: -1058.21000800 Eh

Cartesian coordinates in Ångström:

| [2,2',3,3',4,4'-Hexafluorobiphenyl] <sup>+</sup> |          |          |          |
|--------------------------------------------------|----------|----------|----------|
| atom                                             | x-value  | y-value  | z-value  |
| C                                                | 2.83257  | -1.15309 | 0.40237  |
| C                                                | 1.46301  | -1.16450 | 0.33456  |
| H                                                | 0.93009  | -2.05622 | 0.63434  |
| C                                                | 0.72064  | -0.00462 | -0.04680 |
| C                                                | 1.45839  | 1.16059  | -0.38761 |
| F                                                | 0.83832  | 2.25034  | -0.82091 |
| C                                                | 2.83702  | 1.17938  | -0.34695 |
| F                                                | 3.51192  | 2.25385  | -0.69742 |
| C                                                | 3.51949  | 0.01599  | 0.05375  |
| F                                                | 4.82906  | 0.05172  | 0.08908  |
| F                                                | -0.83832 | -2.25034 | -0.82092 |
| C                                                | -1.45839 | -1.16059 | -0.38761 |
| C                                                | -2.83702 | -1.17938 | -0.34695 |
| F                                                | -3.51192 | -2.25385 | -0.69742 |
| C                                                | -3.51949 | -0.01599 | 0.05376  |
| F                                                | -4.82906 | -0.05171 | 0.08908  |
| C                                                | -2.83256 | 1.15309  | 0.40237  |
| C                                                | -1.46301 | 1.16449  | 0.33455  |
| H                                                | -0.93009 | 2.05621  | 0.63434  |
| C                                                | -0.72064 | 0.00461  | -0.04680 |
| H                                                | -3.39940 | 2.01906  | 0.72471  |
| H                                                | 3.39940  | -2.01906 | 0.72471  |

## 9.20. $[\text{C}_6\text{H}_3\text{F}_3-\text{C}_6\text{H}_2\text{F}_3]^+$

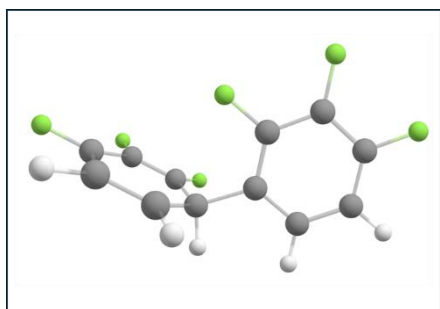

Total enthalpy: -1058.73706107 Eh

Total entropy: 0.05658792 Eh

Final Gibbs free energy: -1058.79364899 Eh

Cartesian coordinates in Ångström:

| [ $\text{C}_6\text{H}_3\text{F}_3-\text{C}_6\text{H}_2\text{F}_3$ ] <sup>+</sup> |          |          |          |
|----------------------------------------------------------------------------------|----------|----------|----------|
| atom                                                                             | x-value  | y-value  | z-value  |
| C                                                                                | -3.81068 | 2.06705  | 1.39724  |
| C                                                                                | -4.37631 | 2.44329  | 0.16415  |
| C                                                                                | -3.02232 | 0.94553  | 1.42078  |
| C                                                                                | -4.17137 | 1.74053  | -1.04301 |
| C                                                                                | -2.72856 | 0.14419  | 0.21253  |
| C                                                                                | -3.38354 | 0.63762  | -1.02367 |
| C                                                                                | -2.96849 | -1.34962 | 0.43801  |
| H                                                                                | -4.65742 | 2.10495  | -1.94162 |
| H                                                                                | -3.20136 | 0.06395  | -1.92702 |
| F                                                                                | -5.13422 | 3.49950  | 0.15777  |
| C                                                                                | -4.26591 | -1.76298 | 0.72667  |
| C                                                                                | -1.95398 | -2.30053 | 0.35950  |
| C                                                                                | -2.23759 | -3.64467 | 0.56736  |
| C                                                                                | -4.56948 | -3.09881 | 0.94251  |
| C                                                                                | -3.53681 | -4.03370 | 0.85574  |
| F                                                                                | -3.82942 | -5.31034 | 1.06293  |
| F                                                                                | -5.80896 | -3.46955 | 1.22311  |
| H                                                                                | -0.93551 | -1.99751 | 0.14212  |
| H                                                                                | -1.46239 | -4.40035 | 0.51672  |
| F                                                                                | -5.24234 | -0.84221 | 0.81419  |
| F                                                                                | -4.07108 | 2.76570  | 2.48136  |
| F                                                                                | -2.49629 | 0.54848  | 2.54446  |
| H                                                                                | -1.63781 | 0.24980  | 0.04211  |

## 9.21. $\text{H}_2$

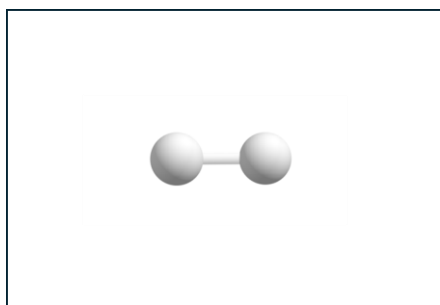

Total enthalpy: -1.15584039 Eh

Total entropy: 0.01544350 Eh

Final Gibbs free energy: -1.17128390 Eh

Cartesian coordinates in Ångström:

| H <sub>2</sub> |          |         |         |
|----------------|----------|---------|---------|
| atom           | x-value  | y-value | z-value |
| H              | -4.78279 | 0.43881 | 0.07052 |
| H              | -4.04127 | 0.43881 | 0.07052 |

## 9.22. 1,2,3-Trimethylbenzene

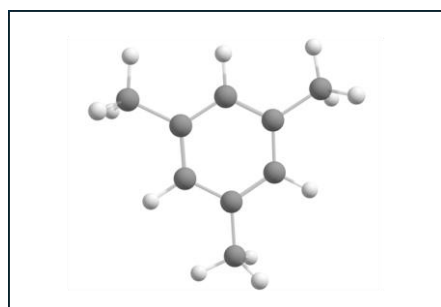

Total enthalpy: -349.89787712 Eh

Total entropy: 0.04009011 Eh

Final Gibbs free energy: -349.93796724 Eh

Cartesian coordinates in Ångström:

| 1,2,3-Trimethylbenzene |          |          |          |
|------------------------|----------|----------|----------|
| atom                   | x-value  | y-value  | z-value  |
| C                      | -0.76795 | -1.01540 | 2.28239  |
| C                      | -1.46972 | -0.38555 | 1.10912  |
| C                      | -2.85985 | -0.25038 | 1.11101  |
| C                      | -3.53385 | 0.32713  | 0.03625  |
| C                      | -2.78996 | 0.77514  | -1.05772 |
| H                      | -3.30488 | 1.22737  | -1.90194 |
| C                      | -1.40158 | 0.65459  | -1.08936 |
| C                      | -0.60513 | 1.14127  | -2.26997 |
| C                      | -0.75533 | 0.07117  | 0.00313  |
| H                      | 0.32792  | -0.02833 | -0.01039 |
| C                      | -5.03310 | 0.46144  | 0.06175  |
| H                      | -3.42809 | -0.60356 | 1.96951  |
| H                      | 0.31477  | -1.03306 | 2.13633  |
| H                      | -1.10579 | -2.04619 | 2.43495  |
| H                      | -0.97665 | -0.46603 | 3.20667  |
| H                      | -5.40615 | 0.93241  | -0.85093 |
| H                      | -5.35909 | 1.06808  | 0.91348  |
| H                      | -5.51398 | -0.51791 | 0.15831  |
| H                      | -1.25471 | 1.55503  | -3.04509 |
| H                      | -0.02292 | 0.32690  | -2.71445 |
| H                      | 0.10408  | 1.92083  | -1.97107 |

### 9.23. 1,3,5-trimethylcyclohexa-2,4-dien-1-ylum

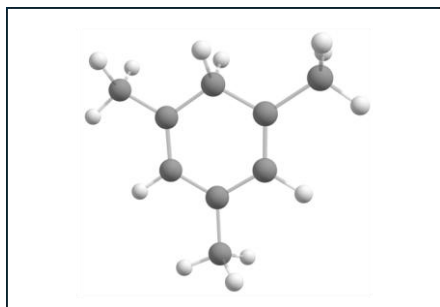

Total enthalpy: -350.22043949 Eh

Total entropy: 0.04395555 Eh

Final Gibbs free energy: -350.26439504 Eh

Cartesian coordinates in Ångström:

| 1,3,5-trimethylcyclohexa-2,4-dien-1-ylum |          |          |          |
|------------------------------------------|----------|----------|----------|
| atom                                     | x-value  | y-value  | z-value  |
| C                                        | -0.75113 | -0.98453 | 2.30855  |
| C                                        | -1.43406 | -0.37017 | 1.14200  |
| C                                        | -2.91101 | -0.23776 | 1.18282  |
| C                                        | -3.59309 | 0.36763  | 0.01386  |
| C                                        | -2.84352 | 0.78495  | -1.05191 |
| H                                        | -3.32918 | 1.23063  | -1.91399 |
| C                                        | -1.43762 | 0.64793  | -1.05904 |
| C                                        | -0.64880 | 1.10892  | -2.22657 |
| C                                        | -0.75774 | 0.07196  | 0.04095  |
| H                                        | 0.32367  | -0.01650 | -0.00351 |
| C                                        | -5.07090 | 0.49756  | 0.04992  |
| H                                        | 0.33117  | -1.00870 | 2.17930  |
| H                                        | -1.10872 | -2.00980 | 2.46531  |
| H                                        | -0.98506 | -0.43417 | 3.22781  |
| H                                        | -5.46096 | 0.96005  | -0.85698 |
| H                                        | -5.38350 | 1.09642  | 0.91423  |
| H                                        | -5.54022 | -0.48619 | 0.17433  |
| H                                        | -1.26975 | 1.52036  | -3.02174 |
| H                                        | -0.05226 | 0.27820  | -2.62468 |
| H                                        | 0.07688  | 1.86801  | -1.90640 |
| H                                        | -3.35532 | -1.22766 | 1.38431  |
| H                                        | -3.19265 | 0.32677  | 2.08872  |

### 9.24. Al(OR<sup>F</sup>)<sub>3</sub>

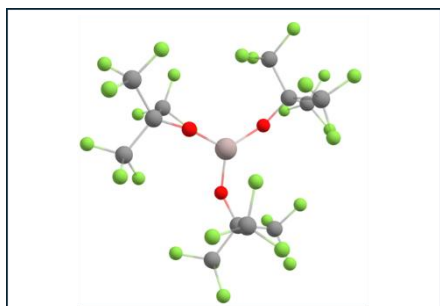

Total enthalpy: -3621.10359337 Eh

Total entropy: 0.10909156 Eh

Final Gibbs free energy: -3621.21268493 Eh

Cartesian coordinates in Ångström:

| Al(OR <sup>F</sup> ) <sub>3</sub> |          |          |          |
|-----------------------------------|----------|----------|----------|
| atom                              | x-value  | y-value  | z-value  |
| Al                                | -1.00593 | -0.64302 | 0.16351  |
| O                                 | -2.09251 | 0.64797  | -0.01758 |
| O                                 | 0.35606  | -0.64277 | 1.25079  |
| O                                 | -1.33391 | -2.05313 | -0.80598 |
| C                                 | -2.45215 | 1.95399  | 0.09777  |
| C                                 | 0.37961  | -1.35737 | 2.41613  |
| C                                 | -0.91373 | -2.18458 | -2.09917 |
| C                                 | -0.57146 | -3.68509 | -2.39490 |
| C                                 | 0.38048  | -1.32172 | -2.30466 |
| C                                 | -2.04065 | -1.68800 | -3.07403 |
| F                                 | 0.13153  | -4.21319 | -1.38813 |
| F                                 | 0.15851  | -3.78938 | -3.52507 |
| F                                 | -1.69073 | -4.40505 | -2.54487 |
| F                                 | -3.22185 | -2.18417 | -2.70191 |
| F                                 | -1.80468 | -2.03994 | -4.34848 |
| F                                 | -2.12057 | -0.34254 | -3.01470 |
| F                                 | 1.47825  | -1.91355 | -1.85896 |
| F                                 | 0.21508  | -0.17490 | -1.46296 |
| F                                 | 0.58322  | -0.85764 | -3.52137 |
| C                                 | 0.94923  | -2.79664 | 2.14261  |
| C                                 | -1.08263 | -1.47878 | 2.97415  |
| C                                 | 1.27326  | -0.61998 | 3.47009  |
| F                                 | 2.57165  | -0.78654 | 3.18319  |
| F                                 | 1.04457  | -1.10665 | 4.70759  |
| F                                 | 1.01174  | 0.68934  | 3.47444  |
| F                                 | -1.92784 | -1.53047 | 1.81840  |
| F                                 | -1.48067 | -0.41056 | 3.64487  |
| F                                 | -1.34794 | -2.56567 | 3.67247  |
| F                                 | 0.01968  | -3.52498 | 1.48872  |
| F                                 | 1.27185  | -3.44409 | 3.27303  |
| F                                 | 2.03175  | -2.72523 | 1.36433  |
| C                                 | -3.95478 | 2.08046  | -0.34433 |
| C                                 | -1.54737 | 2.84051  | -0.82883 |
| C                                 | -2.30034 | 2.42645  | 1.58638  |
| F                                 | -1.41974 | 2.27752  | -2.03910 |
| F                                 | -0.30768 | 2.93715  | -0.30303 |
| F                                 | -2.03784 | 4.07752  | -0.98741 |
| F                                 | -4.06243 | 1.99403  | -1.68094 |
| F                                 | -4.49001 | 3.24974  | 0.04656  |
| F                                 | -4.67715 | 1.08596  | 0.18819  |
| F                                 | -3.26359 | 1.88273  | 2.35259  |
| F                                 | -2.35775 | 3.75870  | 1.71496  |
| F                                 | -1.11778 | 2.00805  | 2.07404  |

## 9.25. $[\text{F-Al}(\text{OR}^{\text{F}})_3]^-$

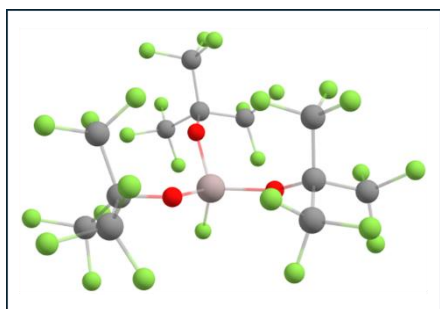

Total enthalpy: -3721.15451682 Eh

Total entropy: 0.11335414 Eh

Final Gibbs free energy: -3721.26787096 Eh

Cartesian coordinates in Ångström:

| $[\text{F-Al}(\text{OR}^{\text{F}})_3]^-$ |          |          |          |
|-------------------------------------------|----------|----------|----------|
| atom                                      | x-value  | y-value  | z-value  |
| Al                                        | -0.04553 | -0.00640 | 0.00422  |
| O                                         | -1.58010 | 0.84380  | -0.14211 |
| O                                         | 0.22170  | -0.52449 | 1.65993  |
| O                                         | -0.19436 | -1.47054 | -0.95401 |
| C                                         | -2.13949 | 2.05306  | 0.04554  |
| C                                         | -0.01638 | -1.48155 | 2.57073  |
| C                                         | -0.50999 | -1.93638 | -2.17500 |
| F                                         | 1.26242  | 0.93317  | -0.44569 |
| C                                         | -0.07193 | -3.44637 | -2.24023 |
| C                                         | 0.23900  | -1.13780 | -3.30226 |
| C                                         | -2.06259 | -1.84623 | -2.43336 |
| F                                         | 1.14072  | -3.61002 | -1.69588 |
| F                                         | -0.01937 | -3.92194 | -3.50647 |
| F                                         | -0.93354 | -4.22172 | -1.55197 |
| F                                         | -2.74135 | -2.17207 | -1.32694 |
| F                                         | -2.46945 | -2.67429 | -3.42638 |
| F                                         | -2.42187 | -0.59677 | -2.78071 |
| F                                         | 1.54765  | -1.45864 | -3.32394 |
| F                                         | 0.14946  | 0.18000  | -3.07485 |
| F                                         | -0.26059 | -1.37790 | -4.53650 |
| C                                         | 0.67584  | -2.84159 | 2.16834  |
| C                                         | -1.55679 | -1.73438 | 2.75389  |
| C                                         | 0.58908  | -0.99177 | 3.93758  |
| F                                         | 1.93490  | -1.08734 | 3.91740  |
| F                                         | 0.14585  | -1.70619 | 4.99761  |
| F                                         | 0.28213  | 0.29320  | 4.15821  |
| F                                         | -2.15890 | -1.81401 | 1.55983  |
| F                                         | -2.13215 | -0.72204 | 3.43160  |
| F                                         | -1.82030 | -2.87682 | 3.42993  |
| F                                         | -0.07029 | -3.52451 | 1.28179  |
| F                                         | 0.87872  | -3.65484 | 3.23354  |
| F                                         | 1.86729  | -2.60642 | 1.60307  |
| C                                         | -3.70037 | 1.86462  | 0.06918  |
| C                                         | -1.75857 | 3.02848  | -1.13036 |
| C                                         | -1.68454 | 2.69634  | 1.40727  |
| F                                         | -1.80537 | 2.38674  | -2.30496 |
| F                                         | -0.50815 | 3.49965  | -0.97317 |

|   |          |         |          |
|---|----------|---------|----------|
| F | -2.58976 | 4.09570 | -1.21163 |
| F | -4.17639 | 1.66020 | -1.17552 |
| F | -4.34578 | 2.94039 | 0.57857  |
| F | -4.03611 | 0.80021 | 0.80820  |
| F | -2.30122 | 2.10386 | 2.44732  |
| F | -1.94881 | 4.02076 | 1.47707  |
| F | -0.36357 | 2.53265 | 1.57520  |

## 9.26. $[\text{Al}(\text{OR}^{\text{F}})_4]^-$

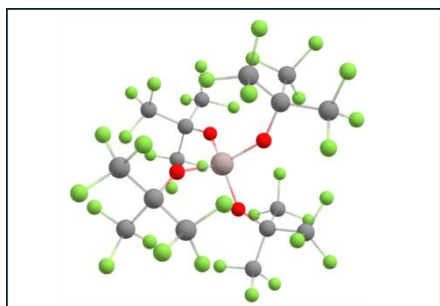

Total enthalpy: -4747.47333644 Eh

Total entropy: 0.13657055 Eh

Final Gibbs free energy: -4747.60990699 Eh

Cartesian coordinates in Ångström:

| $[\text{Al}(\text{OR}^{\text{F}})_4]^-$ |          |          |          |
|-----------------------------------------|----------|----------|----------|
| atom                                    | x-value  | y-value  | z-value  |
| Al                                      | -0.02784 | -0.00248 | 0.01143  |
| O                                       | -1.53903 | 0.85747  | -0.17139 |
| O                                       | 0.30956  | -0.51998 | 1.64556  |
| O                                       | -0.13442 | -1.44715 | -0.96667 |
| C                                       | -2.16051 | 2.04231  | -0.01391 |
| C                                       | 0.08484  | -1.45724 | 2.58548  |
| C                                       | -0.52152 | -1.94813 | -2.15493 |
| O                                       | 1.25644  | 1.08123  | -0.46289 |
| C                                       | 2.57258  | 1.35656  | -0.40509 |
| C                                       | -0.06970 | -3.45441 | -2.21645 |
| C                                       | 0.14804  | -1.16859 | -3.34378 |
| C                                       | -2.08717 | -1.88131 | -2.31643 |
| F                                       | 1.16901  | -3.59564 | -1.72925 |
| F                                       | -0.07535 | -3.94454 | -3.47748 |
| F                                       | -0.88815 | -4.22932 | -1.47757 |
| F                                       | -2.68710 | -2.16905 | -1.15480 |
| F                                       | -2.54739 | -2.75017 | -3.24733 |
| F                                       | -2.48106 | -0.64949 | -2.68785 |
| F                                       | 1.44967  | -1.49489 | -3.45439 |
| F                                       | 0.07915  | 0.15322  | -3.12578 |
| F                                       | -0.44053 | -1.42245 | -4.53346 |
| C                                       | 0.56107  | -2.88100 | 2.10652  |
| C                                       | -1.44125 | -1.53174 | 2.95370  |
| C                                       | 0.90118  | -1.05213 | 3.86746  |
| F                                       | 2.21217  | -1.31285 | 3.69586  |
| F                                       | 0.49414  | -1.71681 | 4.97322  |
| F                                       | 0.77940  | 0.25849  | 4.11135  |

|   |          |          |          |
|---|----------|----------|----------|
| F | -2.18716 | -1.50064 | 1.83944  |
| F | -1.80153 | -0.47967 | 3.71359  |
| F | -1.75938 | -2.65359 | 3.63687  |
| F | -0.35572 | -3.44738 | 1.30082  |
| F | 0.77003  | -3.73001 | 3.14013  |
| F | 1.70549  | -2.78351 | 1.41962  |
| C | -3.68518 | 1.83552  | -0.34561 |
| C | -1.57320 | 3.13111  | -0.98901 |
| C | -2.02756 | 2.55951  | 1.46358  |
| F | -1.30920 | 2.59125  | -2.18489 |
| F | -0.42696 | 3.64258  | -0.50565 |
| F | -2.42864 | 4.16347  | -1.17996 |
| F | -3.87923 | 1.76833  | -1.67748 |
| F | -4.45798 | 2.84061  | 0.12694  |
| F | -4.13329 | 0.69163  | 0.18564  |
| F | -2.83600 | 1.86420  | 2.28600  |
| F | -2.34165 | 3.86715  | 1.59184  |
| F | -0.76899 | 2.39368  | 1.89815  |
| C | 3.00338  | 1.97143  | -1.78828 |
| C | 3.44029  | 0.07131  | -0.13019 |
| C | 2.85033  | 2.40582  | 0.73327  |
| F | 3.12240  | 1.00280  | -2.71842 |
| F | 4.18754  | 2.62212  | -1.72198 |
| F | 2.08533  | 2.84052  | -2.22787 |
| F | 2.94390  | -0.97344 | -0.80837 |
| F | 3.42757  | -0.24929 | 1.17633  |
| F | 4.73185  | 0.22915  | -0.49731 |
| F | 2.43369  | 3.63326  | 0.36311  |
| F | 4.16471  | 2.49888  | 1.04072  |
| F | 2.18892  | 2.07329  | 1.84784  |

## 9.27. HOR<sup>F</sup>

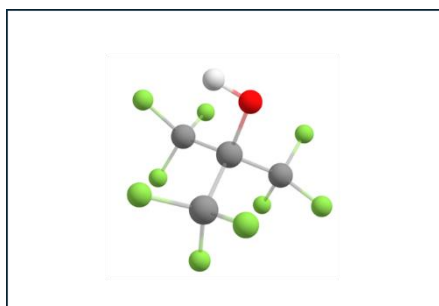

Total enthalpy: -1126.75365708 Eh

Total entropy: 0.05147337 Eh

Final Gibbs free energy: -1126.80513044 Eh

Cartesian coordinates in Ångström:

| HOR <sup>F</sup> |          |          |          |
|------------------|----------|----------|----------|
| atom             | x-value  | y-value  | z-value  |
| O                | -0.16012 | -1.43057 | -0.99518 |
| C                | -0.55056 | -1.96558 | -2.22176 |

|   |          |          |          |
|---|----------|----------|----------|
| C | -0.08885 | -3.45761 | -2.20332 |
| C | 0.15321  | -1.19504 | -3.39195 |
| C | -2.10818 | -1.88096 | -2.37834 |
| F | 1.15264  | -3.56284 | -1.72104 |
| F | -0.11174 | -3.97335 | -3.44501 |
| F | -0.89821 | -4.19530 | -1.42675 |
| F | -2.71371 | -2.23173 | -1.23849 |
| F | -2.56753 | -2.66156 | -3.36533 |
| F | -2.46375 | -0.60294 | -2.64543 |
| F | 1.44646  | -1.53331 | -3.48091 |
| F | 0.10039  | 0.13293  | -3.14044 |
| F | -0.42948 | -1.41715 | -4.57715 |
| H | -0.37863 | -0.48839 | -0.97774 |

### 9.28. R<sup>F</sup>(OH)-Al(OR<sup>F</sup>)<sub>3</sub>

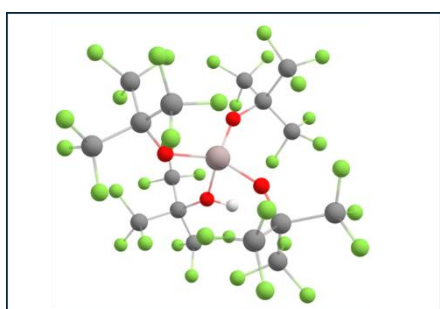

Total enthalpy: -4747.88242664 Eh

Total entropy: 0.13509387 Eh

Final Gibbs free energy: -4748.01752051 Eh

Cartesian coordinates in Ångström:

| R <sup>F</sup> (OH)-Al(OR <sup>F</sup> ) <sub>3</sub> |          |          |          |
|-------------------------------------------------------|----------|----------|----------|
| atom                                                  | x-value  | y-value  | z-value  |
| Al                                                    | -0.03418 | 0.23230  | 0.19012  |
| O                                                     | -1.58847 | 0.78945  | -0.28919 |
| O                                                     | 0.35401  | -0.58792 | 1.64099  |
| O                                                     | 0.01605  | -1.41330 | -0.93247 |
| C                                                     | -2.26819 | 1.96347  | -0.11307 |
| C                                                     | 0.05837  | -1.48080 | 2.62052  |
| C                                                     | -0.44700 | -1.90927 | -2.19282 |
| O                                                     | 1.29257  | 1.10134  | -0.44709 |
| C                                                     | 2.61589  | 1.39012  | -0.35292 |
| C                                                     | -0.02571 | -3.42015 | -2.26996 |
| C                                                     | 0.22373  | -1.08583 | -3.34288 |
| C                                                     | -2.01319 | -1.78976 | -2.25059 |
| F                                                     | 1.22857  | -3.54741 | -1.77224 |
| F                                                     | -0.03032 | -3.86371 | -3.52350 |
| F                                                     | -0.83029 | -4.18091 | -1.52463 |
| F                                                     | -2.53505 | -2.03355 | -1.04780 |
| F                                                     | -2.48889 | -2.69066 | -3.12650 |
| F                                                     | -2.39466 | -0.57872 | -2.65647 |
| F                                                     | 1.52023  | -1.41908 | -3.44435 |
| F                                                     | 0.14542  | 0.21835  | -3.07172 |
| F                                                     | -0.37929 | -1.32947 | -4.51162 |

|   |          |          |          |
|---|----------|----------|----------|
| C | 0.20037  | -2.94329 | 2.06851  |
| C | -1.40441 | -1.27000 | 3.14769  |
| C | 1.07787  | -1.26816 | 3.79887  |
| F | 2.27681  | -1.78791 | 3.47737  |
| F | 0.65727  | -1.85769 | 4.93170  |
| F | 1.24482  | 0.03635  | 4.03469  |
| F | -2.23607 | -1.07522 | 2.10709  |
| F | -1.47082 | -0.18336 | 3.93145  |
| F | -1.84674 | -2.32677 | 3.84715  |
| F | -0.87443 | -3.27616 | 1.32500  |
| F | 0.34842  | -3.85757 | 3.02895  |
| F | 1.27691  | -3.02013 | 1.24603  |
| C | -3.79884 | 1.68975  | -0.31068 |
| C | -1.77881 | 3.02801  | -1.15939 |
| C | -2.02053 | 2.50888  | 1.33721  |
| F | -1.63733 | 2.46159  | -2.36470 |
| F | -0.57652 | 3.51207  | -0.79238 |
| F | -2.63243 | 4.05806  | -1.27119 |
| F | -4.09699 | 1.57018  | -1.61582 |
| F | -4.54118 | 2.69009  | 0.19806  |
| F | -4.15027 | 0.54943  | 0.29573  |
| F | -2.77730 | 1.87499  | 2.23944  |
| F | -2.22235 | 3.82145  | 1.45739  |
| F | -0.71662 | 2.25196  | 1.66451  |
| C | 3.07240  | 1.97222  | -1.73965 |

## 9.29. Xenon

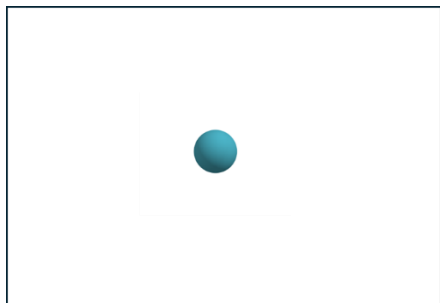

Final single point energy: -329.487151243127 Eh

Total enthalpy: -329.484792 Eh

Total entropy: 0.000064628 Eh

Final Gibbs free energy: -329.5040513 Eh

Cartesian coordinates in Ångström:

| Xenon |          |         |         |
|-------|----------|---------|---------|
| atom  | x-value  | y-value | z-value |
| Xe    | -2.58363 | 0.43881 | 0.30853 |

### 9.30. $[\text{C}_6\text{H}_3\text{F}_2\text{Xe}]^+$

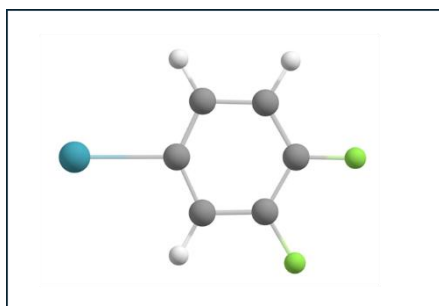

Total enthalpy: -759.09337025 Eh

Total entropy: 0.04353782 Eh

Final Gibbs free energy: -759.13690807 Eh

Cartesian coordinates in Ångström:

| $[\text{C}_6\text{H}_3\text{F}_2\text{Xe}]^+$ |          |          |          |
|-----------------------------------------------|----------|----------|----------|
| atom                                          | x-value  | y-value  | z-value  |
| H                                             | -0.96555 | -0.83173 | 1.97649  |
| C                                             | -1.45960 | -0.38434 | 1.12369  |
| C                                             | -2.84750 | -0.24256 | 1.11343  |
| C                                             | -3.49889 | 0.33391  | 0.01701  |
| F                                             | -4.81458 | 0.44780  | 0.05009  |
| C                                             | -2.78452 | 0.77864  | -1.08281 |
| H                                             | -3.31425 | 1.22297  | -1.91966 |
| C                                             | -1.38976 | 0.66293  | -1.12848 |
| H                                             | -0.82594 | 1.00868  | -1.98397 |
| C                                             | -0.85363 | 0.08704  | -0.01115 |
| F                                             | -3.54669 | -0.65664 | 2.15224  |
| Xe                                            | 1.40937  | -0.12726 | -0.02894 |

### 9.31. $\text{C}_6\text{H}_3\text{F}_2\text{Xe-F-Al}(\text{OR}^f)_3$

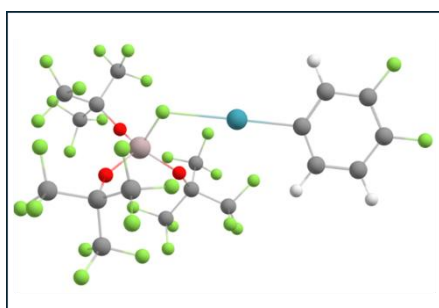

Total enthalpy: -4480.37074328 Eh

Total entropy: 0.13263091 Eh

Final Gibbs free energy: -4480.50337419 Eh

Cartesian coordinates in Ångström:

| $\text{C}_6\text{H}_3\text{F}_2\text{Xe-F-Al}(\text{OR}^f)_3$ |          |         |         |
|---------------------------------------------------------------|----------|---------|---------|
| atom                                                          | x-value  | y-value | z-value |
| H                                                             | -3.38235 | 1.19002 | 3.28132 |

|    |           |          |          |
|----|-----------|----------|----------|
| C  | -3.18690  | 0.84725  | 2.27131  |
| C  | -4.23705  | 0.49218  | 1.42482  |
| C  | -3.89323  | 0.06520  | 0.16023  |
| C  | -2.60877  | -0.03956 | -0.33619 |
| H  | -2.36750  | -0.37899 | -1.33579 |
| C  | -1.58997  | 0.32226  | 0.53430  |
| F  | -0.32260  | 0.25106  | 0.13389  |
| C  | -1.87920  | 0.76214  | 1.82617  |
| F  | -0.87097  | 1.10051  | 2.62800  |
| Xe | -5.52819  | -0.48653 | -1.16328 |
| H  | -5.26400  | 0.54508  | 1.76318  |
| F  | -7.43433  | -1.06207 | -2.70340 |
| F  | -8.72424  | 1.84674  | -3.26071 |
| F  | -6.32676  | -2.00470 | 1.75045  |
| F  | -7.36559  | -3.71723 | -4.66057 |
| F  | -8.37691  | 1.26142  | -1.20127 |
| F  | -6.78527  | -3.87488 | -0.19988 |
| F  | -9.29895  | -1.83358 | -4.84487 |
| C  | -9.31097  | 1.75821  | -2.05527 |
| Al | -8.89982  | -1.63375 | -1.98052 |
| F  | -7.61052  | -5.16694 | -3.07050 |
| C  | -7.66321  | -1.81103 | 1.94206  |
| O  | -9.32181  | -3.20798 | -2.55117 |
| F  | -7.54428  | -4.55716 | 1.72474  |
| F  | -9.61080  | 2.99796  | -1.64112 |
| F  | -10.87533 | 0.70419  | -4.47011 |
| C  | -8.22204  | -4.61768 | -4.13033 |
| F  | -7.85489  | -0.47973 | 1.91532  |
| F  | -7.96530  | -2.25393 | 3.16706  |
| C  | -7.89103  | -3.95700 | 0.56897  |
| O  | -10.17825 | -0.49263 | -2.21031 |
| C  | -10.04298 | -2.96100 | -4.84415 |
| C  | -9.55077  | -3.90540 | -3.69011 |
| C  | -10.55249 | 0.80098  | -2.09998 |
| O  | -8.35412  | -1.75180 | -0.31121 |
| C  | -8.48044  | -2.51304 | 0.80096  |
| F  | -9.94008  | -3.52219 | -6.05993 |
| F  | -8.42635  | -5.58381 | -5.04271 |
| C  | -11.43839 | 1.16814  | -3.34740 |
| F  | -11.59889 | 2.50051  | -3.48165 |
| F  | -8.76841  | -4.74451 | -0.06171 |
| F  | -11.32034 | -2.59653 | -4.65317 |
| F  | -10.58283 | 1.03363  | 0.29019  |
| C  | -11.39705 | 0.99546  | -0.78652 |
| F  | -12.65508 | 0.60979  | -3.23617 |
| C  | -10.65420 | -4.98294 | -3.39510 |
| C  | -9.98268  | -2.63077 | 1.24271  |
| F  | -10.14705 | -5.99282 | -2.66384 |
| F  | -10.17628 | -3.62739 | 2.12476  |
| F  | -11.65817 | -4.43973 | -2.69637 |
| F  | -10.39863 | -1.48526 | 1.81152  |
| F  | -12.11292 | 2.13560  | -0.80017 |
| F  | -12.24008 | -0.02783 | -0.61924 |
| F  | -11.16251 | -5.50550 | -4.52847 |
| F  | -10.75139 | -2.85705 | 0.16744  |

---

### 9.32. $[\text{C}_6\text{F}_3\text{H}_2\text{Xe}]^+$

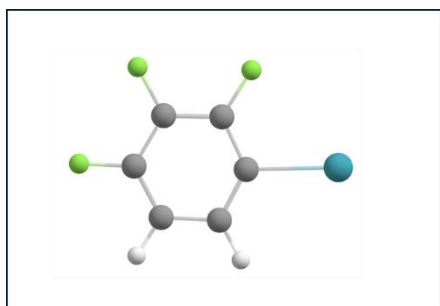

Total enthalpy: -858.32544837 Eh

Total entropy: 0.04543354 Eh

Final Gibbs free energy: -858.37088191 Eh

Cartesian coordinates in Ångström:

| $[\text{C}_6\text{F}_3\text{H}_2\text{Xe}]^+$ |          |          |          |
|-----------------------------------------------|----------|----------|----------|
| atom                                          | x-value  | y-value  | z-value  |
| F                                             | -0.83267 | -0.90905 | 2.10793  |
| C                                             | -1.47582 | -0.36653 | 1.09035  |
| C                                             | -2.86533 | -0.23486 | 1.10302  |
| C                                             | -3.50511 | 0.34207  | 0.00185  |
| F                                             | -4.81989 | 0.45348  | 0.03879  |
| C                                             | -2.79546 | 0.78905  | -1.10317 |
| H                                             | -3.33000 | 1.23138  | -1.93709 |
| C                                             | -1.40527 | 0.67356  | -1.14734 |
| H                                             | -0.84478 | 1.02050  | -2.00576 |
| C                                             | -0.83038 | 0.10038  | -0.04214 |
| F                                             | -3.54605 | -0.65447 | 2.14860  |
| Xe                                            | 1.35923  | -0.14606 | 0.02289  |

### 9.33. $\text{C}_6\text{H}_2\text{F}_3\text{Xe-F-Al}(\text{OR}^{\text{F}})_3$

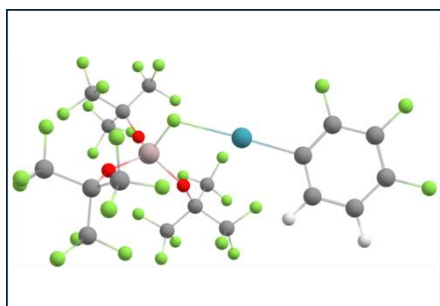

Total enthalpy: -4579.60812591 Eh

Total entropy: 0.13442499 Eh

Final Gibbs free energy: -4579.74255090 Eh

Cartesian coordinates in Ångström:

| $\text{C}_6\text{H}_2\text{F}_3\text{Xe-F-Al}(\text{OR}^{\text{F}})_3$ |          |         |         |
|------------------------------------------------------------------------|----------|---------|---------|
| atom                                                                   | x-value  | y-value | z-value |
| H                                                                      | -3.40252 | 1.18861 | 3.29532 |

|    |           |          |          |
|----|-----------|----------|----------|
| C  | -3.21443  | 0.84961  | 2.28335  |
| C  | -4.26493  | 0.49264  | 1.44252  |
| C  | -3.95255  | 0.06607  | 0.16719  |
| C  | -2.65742  | -0.02167 | -0.31444 |
| F  | -2.39493  | -0.43382 | -1.55028 |
| C  | -1.61342  | 0.33725  | 0.53355  |
| F  | -0.35921  | 0.26631  | 0.10731  |
| C  | -1.90901  | 0.76997  | 1.82517  |
| F  | -0.89488  | 1.10890  | 2.61762  |
| Xe | -5.53707  | -0.49544 | -1.17278 |
| H  | -5.29021  | 0.54002  | 1.78814  |
| F  | -7.42026  | -1.06767 | -2.68893 |
| F  | -8.70705  | 1.84893  | -3.25399 |
| F  | -6.32268  | -2.00914 | 1.75492  |
| F  | -7.35509  | -3.72933 | -4.65097 |
| F  | -8.36385  | 1.26027  | -1.19489 |
| F  | -6.78369  | -3.87847 | -0.19536 |
| F  | -9.27568  | -1.83282 | -4.83818 |
| C  | -9.29633  | 1.75984  | -2.05002 |
| Al | -8.89544  | -1.63761 | -1.97255 |
| F  | -7.61389  | -5.17961 | -3.06348 |
| C  | -7.65897  | -1.81627 | 1.94891  |
| O  | -9.31211  | -3.20975 | -2.54789 |
| F  | -7.54307  | -4.56229 | 1.72860  |
| F  | -9.59527  | 2.99882  | -1.63431 |
| F  | -10.85776 | 0.71115  | -4.46870 |
| C  | -8.21828  | -4.62552 | -4.12474 |
| F  | -7.85079  | -0.48470 | 1.92453  |
| F  | -7.95963  | -2.26122 | 3.17313  |
| C  | -7.88922  | -3.96072 | 0.57373  |
| O  | -10.16388 | -0.48962 | -2.21130 |
| C  | -10.02636 | -2.95622 | -4.84233 |
| C  | -9.54374  | -3.90521 | -3.68806 |
| C  | -10.53849 | 0.80388  | -2.09818 |
| O  | -8.34887  | -1.75374 | -0.30415 |
| C  | -8.47690  | -2.51631 | 0.80759  |
| F  | -9.92223  | -3.51595 | -6.05821 |
| F  | -8.42619  | -5.58899 | -5.03871 |
| C  | -11.42239 | 1.17363  | -3.34625 |
| F  | -11.58153 | 2.50622  | -3.47797 |
| F  | -8.76785  | -4.74601 | -0.05780 |
| F  | -11.30214 | -2.58424 | -4.65528 |
| F  | -10.57147 | 1.03072  | 0.29233  |
| C  | -11.38457 | 0.99552  | -0.78543 |
| F  | -12.63939 | 0.61576  | -3.23747 |
| C  | -10.65527 | -4.97492 | -3.39620 |
| C  | -9.97951  | -2.63199 | 1.24798  |
| F  | -10.15754 | -5.98766 | -2.66270 |
| F  | -10.17534 | -3.62975 | 2.12773  |
| F  | -11.65783 | -4.42426 | -2.70099 |
| F  | -10.39395 | -1.48680 | 1.81829  |
| F  | -12.09966 | 2.13584  | -0.79755 |
| F  | -12.22791 | -0.02804 | -0.62170 |
| F  | -11.16308 | -5.49407 | -4.53111 |
| F  | -10.74744 | -2.85479 | 0.17114  |

---

### 9.34. $[\text{C}_6\text{H}_5\text{Xe}]^+$

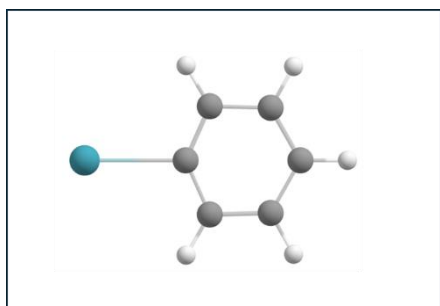

Total enthalpy: -560.61284856 Eh

Total entropy: 0.03956643 Eh

Final Gibbs free energy: -560.65241499 Eh

Cartesian coordinates in Ångström:

| $[\text{C}_6\text{H}_5\text{Xe}]^+$ |          |          |          |
|-------------------------------------|----------|----------|----------|
| atom                                | x-value  | y-value  | z-value  |
| H                                   | -0.94471 | -0.82754 | 1.96324  |
| C                                   | -1.46072 | -0.38355 | 1.12296  |
| C                                   | -2.85765 | -0.23842 | 1.10614  |
| C                                   | -3.50445 | 0.33437  | 0.01793  |
| C                                   | -2.78611 | 0.77981  | -1.08479 |
| H                                   | -3.28393 | 1.22851  | -1.93869 |
| C                                   | -1.38712 | 0.66407  | -1.13163 |
| H                                   | -0.81578 | 1.00671  | -1.98348 |
| C                                   | -0.87000 | 0.08865  | -0.01028 |
| Xe                                  | 1.44940  | -0.12781 | -0.03539 |
| H                                   | -3.41148 | -0.58893 | 1.97143  |
| H                                   | -4.58387 | 0.43515  | 0.02946  |

### 9.35. $\text{C}_6\text{H}_5\text{Xe-F-Al}(\text{OR}^{\text{F}})_3$

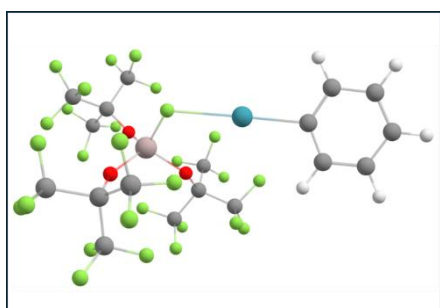

Total enthalpy: -4281.88229595 Eh

Total entropy: 0.12958946 Eh

Final Gibbs free energy: -4282.01188540 Eh

Cartesian coordinates in Ångström:

| $\text{C}_6\text{H}_5\text{Xe-F-Al}(\text{OR}^{\text{F}})_3$ |          |         |         |
|--------------------------------------------------------------|----------|---------|---------|
| atom                                                         | x-value  | y-value | z-value |
| H                                                            | -3.39247 | 1.19274 | 3.28655 |

|    |           |          |          |
|----|-----------|----------|----------|
| C  | -3.16055  | 0.85297  | 2.28289  |
| C  | -4.21160  | 0.50160  | 1.43391  |
| C  | -3.85137  | 0.07607  | 0.17485  |
| C  | -2.56871  | -0.03343 | -0.31468 |
| H  | -2.35178  | -0.37738 | -1.31812 |
| C  | -1.54565  | 0.32665  | 0.56443  |
| H  | -0.51718  | 0.25690  | 0.22676  |
| C  | -1.84135  | 0.76575  | 1.85071  |
| H  | -1.03624  | 1.04122  | 2.52267  |
| Xe | -5.49591  | -0.47792 | -1.16519 |
| H  | -5.24277  | 0.55553  | 1.76012  |
| F  | -7.43391  | -1.06135 | -2.72170 |
| F  | -8.72870  | 1.84613  | -3.27660 |
| F  | -6.31765  | -2.00317 | 1.74379  |
| F  | -7.37826  | -3.71829 | -4.67639 |
| F  | -8.36631  | 1.26465  | -1.21859 |
| F  | -6.77683  | -3.87629 | -0.20634 |
| F  | -9.31522  | -1.83673 | -4.85319 |
| C  | -9.30601  | 1.75849  | -2.06651 |
| Al | -8.88857  | -1.63063 | -1.98867 |
| F  | -7.61123  | -5.16428 | -3.08114 |
| C  | -7.65341  | -1.80969 | 1.93466  |
| O  | -9.32178  | -3.20559 | -2.55450 |
| F  | -7.53476  | -4.55642 | 1.71931  |
| F  | -9.60458  | 2.99946  | -1.65268 |
| F  | -10.88713 | 0.69875  | -4.46863 |
| C  | -8.23037  | -4.61749 | -4.13790 |
| F  | -7.84655  | -0.47893 | 1.90850  |
| F  | -7.95586  | -2.25296 | 3.16041  |
| C  | -7.88188  | -3.95658 | 0.56288  |
| O  | -10.17423 | -0.49306 | -2.21054 |
| C  | -10.05761 | -2.96439 | -4.84350 |
| C  | -9.55677  | -3.90522 | -3.69002 |
| C  | -10.54743 | 0.80040  | -2.10073 |
| O  | -8.34535  | -1.75220 | -0.31836 |
| C  | -8.47116  | -2.51229 | 0.79378  |
| F  | -9.96289  | -3.52939 | -6.05880 |
| F  | -8.43998  | -5.58657 | -5.04678 |
| C  | -11.44206 | 1.16477  | -3.34273 |
| F  | -11.60456 | 2.49696  | -3.47937 |
| F  | -8.76004  | -4.74514 | -0.06621 |
| F  | -11.33445 | -2.60111 | -4.64510 |
| F  | -10.56276 | 1.04158  | 0.28921  |
| C  | -11.38343 | 0.99862  | -0.78220 |
| F  | -12.65815 | 0.60640  | -3.22212 |
| C  | -10.65703 | -4.98370 | -3.38617 |
| C  | -9.97293  | -2.63063 | 1.23733  |
| F  | -10.14401 | -5.99229 | -2.65687 |
| F  | -10.16528 | -3.62676 | 2.12102  |
| F  | -11.65729 | -4.44122 | -2.68167 |
| F  | -10.38916 | -1.48500 | 1.80616  |
| F  | -12.10107 | 2.13823  | -0.79473 |
| F  | -12.22478 | -0.02466 | -0.60577 |
| F  | -11.17259 | -5.50924 | -4.51531 |
| F  | -10.74356 | -2.85850 | 0.16404  |

---

### 9.36. [XeF]<sup>+</sup>

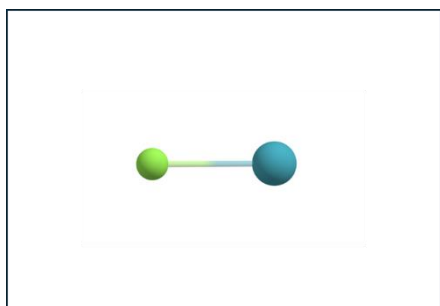

Total enthalpy: -428.82486979 Eh

Total entropy: 0.02681538 Eh

Final Gibbs free energy: -428.85168517 Eh

Cartesian coordinates in Ångström:

| [XeF] <sup>+</sup> |          |          |         |
|--------------------|----------|----------|---------|
| atom               | x-value  | y-value  | z-value |
| Xe                 | -3.00693 | -1.32785 | 0.44676 |
| F                  | -1.92465 | -2.89354 | 0.46060 |

### 9.37. C<sub>6</sub>H<sub>3</sub>F<sub>2</sub>XeF

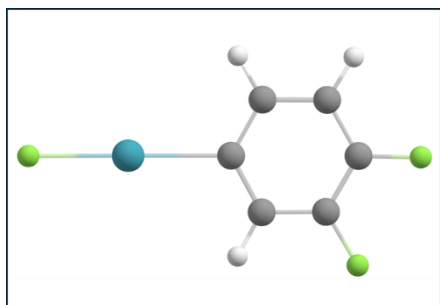

Total enthalpy: -859.17820763 Eh

Total entropy: 0.04650292 Eh

Final Gibbs free energy: -859.22471055 Eh

Cartesian coordinates in Ångström:

| C <sub>6</sub> H <sub>3</sub> F <sub>2</sub> XeF |          |          |          |
|--------------------------------------------------|----------|----------|----------|
| atom                                             | x-value  | y-value  | z-value  |
| C                                                | -3.86638 | 1.94285  | 1.39152  |
| C                                                | -4.64119 | 2.15370  | 0.25385  |
| C                                                | -2.67859 | 1.23190  | 1.31526  |
| C                                                | -4.24005 | 1.65775  | -0.97398 |
| C                                                | -2.29359 | 0.74260  | 0.07611  |
| C                                                | -3.04797 | 0.93983  | -1.06854 |
| Xe                                               | -0.39973 | -0.41051 | -0.06081 |
| H                                                | -4.86361 | 1.83688  | -1.84314 |
| H                                                | -2.73058 | 0.54840  | -2.02873 |
| F                                                | -5.78377 | 2.84427  | 0.36448  |
| F                                                | -4.28315 | 2.43350  | 2.56580  |

|   |          |          |          |
|---|----------|----------|----------|
| H | -2.09499 | 1.08139  | 2.21725  |
| F | 1.42850  | -1.53253 | -0.18399 |

### 9.38. C<sub>6</sub>H<sub>4</sub>F<sub>2</sub>XeF

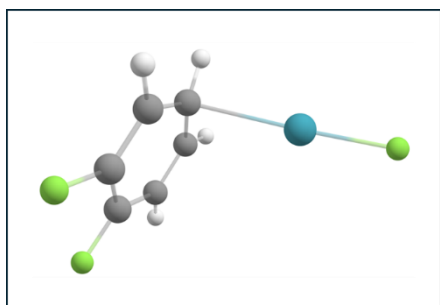

Total enthalpy: -859.47911347 Eh

Total entropy: 0.04746580 Eh

Final Gibbs free energy: -859.52657926 Eh

Cartesian coordinates in Ångström:

| C <sub>6</sub> H <sub>3</sub> F <sub>2</sub> XeF |          |          |          |
|--------------------------------------------------|----------|----------|----------|
| atom                                             | x-value  | y-value  | z-value  |
| C                                                | -3.82213 | 1.95425  | 1.42178  |
| C                                                | -4.62319 | 2.12325  | 0.26514  |
| C                                                | -2.62683 | 1.29299  | 1.33682  |
| C                                                | -4.24135 | 1.61965  | -0.97937 |
| C                                                | -2.22798 | 0.74671  | 0.08157  |
| C                                                | -3.04046 | 0.95452  | -1.07875 |
| Xe                                               | -2.81595 | -1.74601 | 0.37107  |
| H                                                | -4.88616 | 1.78633  | -1.83542 |
| H                                                | -2.69916 | 0.58383  | -2.03994 |
| F                                                | -5.75227 | 2.76974  | 0.38996  |
| F                                                | -4.25371 | 2.46617  | 2.55782  |
| H                                                | -1.99985 | 1.19552  | 2.21747  |
| H                                                | -1.17592 | 0.50617  | -0.05944 |
| F                                                | -3.20783 | -3.72462 | 0.66993  |

### 9.39. C<sub>6</sub>H<sub>2</sub>F<sub>3</sub>XeF

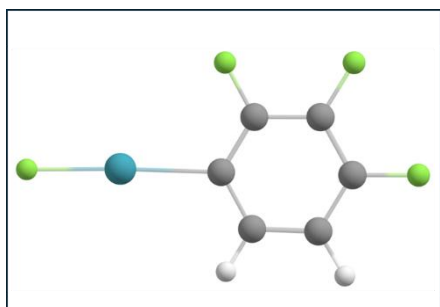

Total enthalpy: -958.42025675 Eh

Total entropy: 0.04848397 Eh

Final Gibbs free energy: -958.46874072 Eh

Cartesian coordinates in Ångström:

| C <sub>6</sub> H <sub>2</sub> F <sub>3</sub> XeF |          |          |          |
|--------------------------------------------------|----------|----------|----------|
| atom                                             | x-value  | y-value  | z-value  |
| C                                                | -3.91799 | 1.95406  | 1.38246  |
| C                                                | -4.68930 | 2.10279  | 0.23348  |
| C                                                | -2.67976 | 1.32682  | 1.28350  |
| C                                                | -4.24786 | 1.64040  | -0.99510 |
| C                                                | -2.23222 | 0.86210  | 0.06150  |
| C                                                | -3.00624 | 1.01426  | -1.07842 |
| Xe                                               | -0.24944 | -0.12411 | -0.05386 |
| H                                                | -4.87639 | 1.77503  | -1.86779 |
| H                                                | -2.65268 | 0.64960  | -2.03680 |
| F                                                | -5.87800 | 2.70764  | 0.34388  |
| F                                                | -4.35705 | 2.40484  | 2.55791  |
| F                                                | -1.94010 | 1.18778  | 2.39193  |
| F                                                | 1.64992  | -1.07618 | -0.24662 |

#### 9.40. C<sub>6</sub>H<sub>3</sub>F<sub>3</sub>XeF

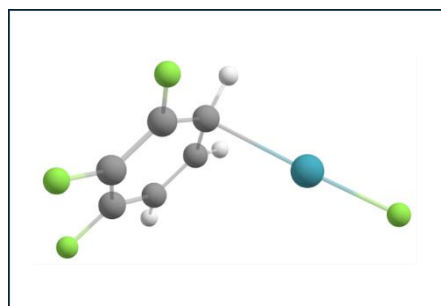

Total enthalpy: -958.71885347 Eh

Total entropy: 0.04923052 Eh

Final Gibbs free energy: -958.76808399 Eh

Cartesian coordinates in Ångström:

| C <sub>6</sub> H <sub>3</sub> F <sub>3</sub> XeF |          |          |          |
|--------------------------------------------------|----------|----------|----------|
| atom                                             | x-value  | y-value  | z-value  |
| C                                                | -3.86049 | 1.94444  | 1.41326  |
| C                                                | -4.63094 | 2.13599  | 0.25254  |
| C                                                | -2.66487 | 1.26572  | 1.29148  |
| C                                                | -4.24261 | 1.65094  | -1.00744 |
| C                                                | -2.25265 | 0.71246  | 0.04093  |
| C                                                | -3.05753 | 0.97361  | -1.11754 |
| Xe                                               | -2.79542 | -1.74138 | 0.42369  |
| H                                                | -4.88041 | 1.85114  | -1.86126 |
| H                                                | -2.71408 | 0.61736  | -2.08293 |
| F                                                | -5.75503 | 2.79121  | 0.37429  |
| F                                                | -4.26678 | 2.42381  | 2.56826  |
| F                                                | -1.89575 | 1.09772  | 2.34452  |
| H                                                | -1.18777 | 0.51809  | -0.08020 |

F      -3.16846      -3.71260      0.75905

---

### 9.41. C<sub>6</sub>H<sub>5</sub>XeF

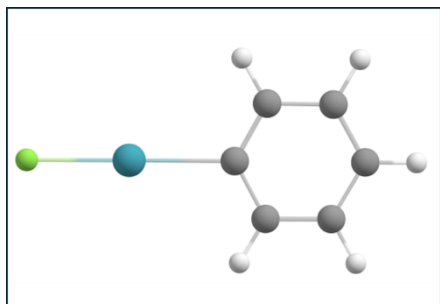

Total enthalpy: -660.68468455 Eh

Total entropy: 0.04248261 Eh

Final Gibbs free energy: -660.72716716 Eh

Cartesian coordinates in Ångström:

| Name |          |          |          |
|------|----------|----------|----------|
| atom | x-value  | y-value  | z-value  |
| C    | -3.97842 | 1.99250  | 1.43972  |
| C    | -4.71843 | 2.14071  | 0.27044  |
| C    | -2.74081 | 1.34990  | 1.41107  |
| C    | -4.22743 | 1.64906  | -0.93527 |
| C    | -2.27568 | 0.86956  | 0.19829  |
| C    | -2.99160 | 1.00418  | -0.97968 |
| Xe   | -0.31008 | -0.17014 | 0.13855  |
| H    | -4.80336 | 1.76402  | -1.84801 |
| H    | -2.60780 | 0.61957  | -1.91911 |
| H    | -4.36011 | 2.37539  | 2.38085  |
| H    | -2.16309 | 1.23277  | 2.32224  |
| F    | 1.59403  | -1.19093 | 0.07483  |
| H    | -5.68074 | 2.64064  | 0.29901  |

### 9.42. C<sub>6</sub>H<sub>6</sub>XeF

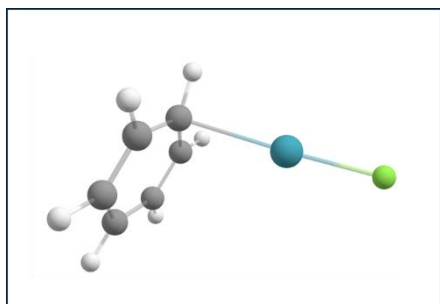

Total enthalpy: -660.98991841 Eh

Total entropy: 0.04361520 Eh

Final Gibbs free energy: -661.03353360 Eh

Cartesian coordinates in Ångström:

C<sub>6</sub>H<sub>6</sub>XeF

| atom | x-value  | y-value  | z-value  |
|------|----------|----------|----------|
| C    | -3.84631 | 1.92087  | 1.43874  |
| C    | -4.63727 | 2.10809  | 0.29604  |
| C    | -2.63628 | 1.27029  | 1.33135  |
| C    | -4.23372 | 1.63892  | -0.96229 |
| C    | -2.21307 | 0.76294  | 0.06290  |
| C    | -3.02727 | 0.98558  | -1.09150 |
| Xe   | -2.83221 | -1.68819 | 0.45268  |
| H    | -4.86016 | 1.80974  | -1.83051 |
| H    | -2.68095 | 0.63985  | -2.06057 |
| H    | -4.17831 | 2.30576  | 2.39638  |
| H    | -1.99408 | 1.13967  | 2.19687  |
| H    | -1.16086 | 0.51987  | -0.07846 |
| F    | -3.24547 | -3.65582 | 0.75681  |
| H    | -5.58435 | 2.63110  | 0.38756  |

9.43. C<sub>6</sub>H<sub>4</sub>FXeF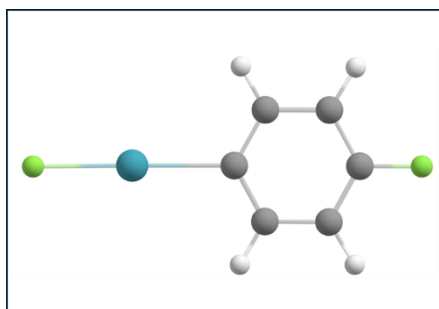

Total enthalpy: -759.93503199 Eh

Total entropy: 0.04440055 Eh

Final Gibbs free energy: -759.97943255 Eh

Cartesian coordinates in Ångström:

C<sub>6</sub>H<sub>4</sub>FXeF

| atom | x-value  | y-value  | z-value  |
|------|----------|----------|----------|
| C    | -3.86812 | 1.95654  | 1.42694  |
| C    | -4.63091 | 2.17813  | 0.29116  |
| C    | -2.69595 | 1.21295  | 1.30607  |
| C    | -4.27480 | 1.69093  | -0.95665 |
| C    | -2.33422 | 0.72281  | 0.06088  |
| C    | -3.10146 | 0.94798  | -1.07134 |
| Xe   | -0.46560 | -0.46391 | -0.11449 |
| H    | -4.90535 | 1.89149  | -1.81548 |
| H    | -2.80529 | 0.55763  | -2.03950 |
| F    | -5.76543 | 2.89665  | 0.40391  |
| H    | -4.18863 | 2.35861  | 2.38141  |
| H    | -2.08443 | 1.02772  | 2.18315  |
| F    | 1.34948  | -1.61637 | -0.26397 |

#### 9.44. C<sub>6</sub>H<sub>5</sub>FXeF

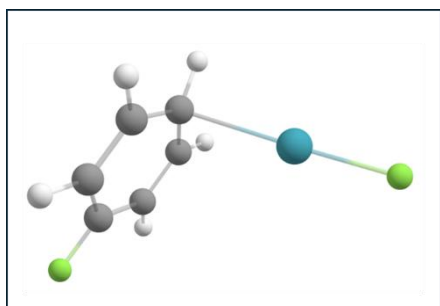

Total enthalpy: -760.24192799 Eh

Total entropy: 0.04545719 Eh

Final Gibbs free energy: -760.28738517 Eh

Cartesian coordinates in Ångström:

| C <sub>6</sub> H <sub>5</sub> FXeF |          |          |          |
|------------------------------------|----------|----------|----------|
| atom                               | x-value  | y-value  | z-value  |
| C                                  | -3.84731 | 1.93759  | 1.45069  |
| C                                  | -4.61578 | 2.12109  | 0.29107  |
| C                                  | -2.65520 | 1.26877  | 1.33535  |
| C                                  | -4.23898 | 1.65254  | -0.97679 |
| C                                  | -2.24056 | 0.73972  | 0.07010  |
| C                                  | -3.04644 | 0.98394  | -1.08894 |
| Xe                                 | -2.80076 | -1.71894 | 0.45100  |
| H                                  | -4.87841 | 1.84870  | -1.83023 |
| H                                  | -2.70413 | 0.63306  | -2.05755 |
| F                                  | -5.75207 | 2.76979  | 0.39816  |
| H                                  | -4.19720 | 2.34432  | 2.39297  |
| H                                  | -2.01683 | 1.13315  | 2.20289  |
| H                                  | -1.18540 | 0.51382  | -0.07380 |
| F                                  | -3.19371 | -3.69905 | 0.75374  |

#### 9.45. [C<sub>6</sub>H<sub>4</sub>FXe]<sup>+</sup>

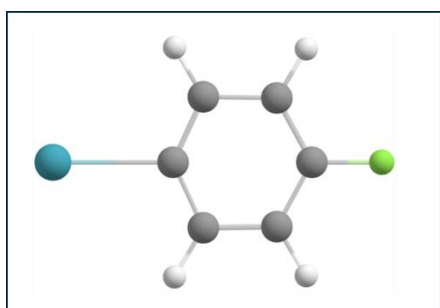

Total enthalpy: -659.85610450 Eh

Total entropy: 0.04141873 Eh

Final Gibbs free energy: -659.89752323 Eh

Cartesian coordinates in Ångström:

[C<sub>6</sub>H<sub>4</sub>FXe]<sup>+</sup>

| atom | x-value  | y-value  | z-value  |
|------|----------|----------|----------|
| H    | -0.95864 | -0.83445 | 1.98209  |
| C    | -1.47621 | -0.39047 | 1.14212  |
| C    | -2.86604 | -0.25255 | 1.13966  |
| C    | -3.49347 | 0.32321  | 0.04039  |
| F    | -4.81446 | 0.44566  | 0.05633  |
| C    | -2.79745 | 0.77639  | -1.07480 |
| H    | -3.32641 | 1.22000  | -1.91161 |
| C    | -1.40645 | 0.65638  | -1.11115 |
| H    | -0.83652 | 0.99958  | -1.96436 |
| C    | -0.86986 | 0.07998  | 0.00853  |
| H    | -3.44717 | -0.59306 | 1.99007  |
| Xe   | 1.40113  | -0.13121 | -0.01933 |

### 9.46. C<sub>6</sub>H<sub>4</sub>FXe-F-Al(OR<sup>F</sup>)<sub>3</sub>

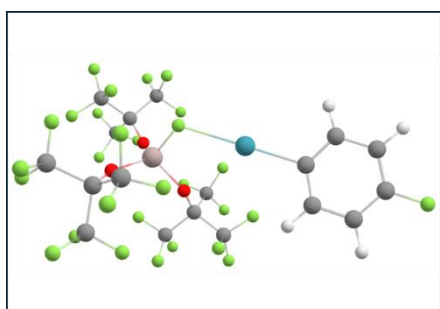

Total enthalpy: -4381.13028095 Eh

Total entropy: 0.13102446 Eh

Final Gibbs free energy: -4381.26130541 Eh

Cartesian coordinates in Ångström:

| C <sub>6</sub> H <sub>4</sub> FXe-F-Al(OR <sup>F</sup> ) <sub>3</sub> |          |          |          |
|-----------------------------------------------------------------------|----------|----------|----------|
| atom                                                                  | x-value  | y-value  | z-value  |
| H                                                                     | -3.37376 | 1.18982  | 3.28223  |
| C                                                                     | -3.17651 | 0.84549  | 2.27360  |
| C                                                                     | -4.22103 | 0.49472  | 1.42202  |
| C                                                                     | -3.87399 | 0.06525  | 0.15732  |
| C                                                                     | -2.58799 | -0.04617 | -0.33054 |
| H                                                                     | -2.37311 | -0.39125 | -1.33423 |
| C                                                                     | -1.55527 | 0.30813  | 0.53399  |
| H                                                                     | -0.51962 | 0.24558  | 0.22059  |
| C                                                                     | -1.87162 | 0.74539  | 1.81252  |
| F                                                                     | -0.87237 | 1.08516  | 2.63617  |
| Xe                                                                    | -5.51380 | -0.47981 | -1.16841 |
| H                                                                     | -5.25035 | 0.55273  | 1.75404  |
| F                                                                     | -7.43597 | -1.05788 | -2.71400 |
| F                                                                     | -8.72993 | 1.84838  | -3.26690 |
| F                                                                     | -6.31926 | -1.99728 | 1.74408  |
| F                                                                     | -7.37040 | -3.71436 | -4.66916 |
| F                                                                     | -8.37655 | 1.26432  | -1.20808 |
| F                                                                     | -6.77785 | -3.87032 | -0.20451 |
| F                                                                     | -9.30817 | -1.83465 | -4.84955 |
| C                                                                     | -9.31306 | 1.75925  | -2.05972 |
| Al                                                                    | -8.89514 | -1.63026 | -1.98535 |

|   |           |          |          |
|---|-----------|----------|----------|
| F | -7.60684  | -5.16240 | -3.07630 |
| C | -7.65558  | -1.80495 | 1.93656  |
| O | -9.32023  | -3.20576 | -2.55295 |
| F | -7.53362  | -4.55132 | 1.72173  |
| F | -9.61370  | 2.99912  | -1.64545 |
| F | -10.88237 | 0.70187  | -4.47027 |
| C | -8.22334  | -4.61529 | -4.13442 |
| F | -7.84917  | -0.47408 | 1.90919  |
| F | -7.95604  | -2.24738 | 3.16247  |
| C | -7.88246  | -3.95247 | 0.56564  |
| O | -10.17873 | -0.49273 | -2.21088 |
| C | -10.05003 | -2.96310 | -4.84371 |
| C | -9.55172  | -3.90481 | -3.68998 |
| C | -10.55367 | 0.80049  | -2.10085 |
| O | -8.34943  | -1.74878 | -0.31588 |
| C | -8.47335  | -2.50894 | 0.79682  |
| F | -9.95112  | -3.52632 | -6.05919 |
| F | -8.42929  | -5.58323 | -5.04492 |
| C | -11.44295 | 1.16596  | -3.34635 |
| F | -11.60538 | 2.49816  | -3.48142 |
| F | -8.75982  | -4.74194 | -0.06299 |
| F | -11.32745 | -2.60078 | -4.64840 |
| F | -10.57915 | 1.03595  | 0.28927  |
| C | -11.39547 | 0.99554  | -0.78565 |
| F | -12.65900 | 0.60656  | -3.23197 |
| C | -10.65192 | -4.98436 | -3.38993 |
| C | -9.97479  | -2.62856 | 1.24102  |
| F | -10.14001 | -5.99289 | -2.65995 |
| F | -10.16571 | -3.62456 | 2.12471  |
| F | -11.65437 | -4.44289 | -2.68776 |
| F | -10.39175 | -1.48311 | 1.80940  |
| F | -12.11293 | 2.13494  | -0.79886 |
| F | -12.23720 | -0.02840 | -0.61528 |
| F | -11.16375 | -5.50910 | -4.52091 |
| F | -10.74510 | -2.85732 | 0.16754  |

---

### 9.47. [C<sub>6</sub>F<sub>5</sub>Xe]<sup>+</sup>

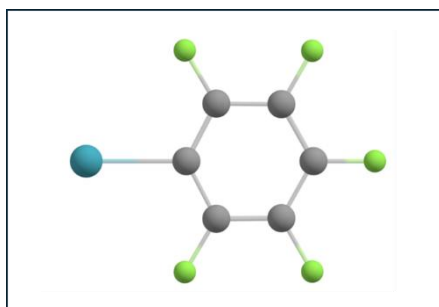

Total enthalpy: -1056.78965958 Eh

Total entropy: 0.04978027 Eh

Final Gibbs free energy: -1056.83943985 Eh

Cartesian coordinates in Ångström:

[C<sub>6</sub>F<sub>5</sub>Xe]<sup>+</sup>

---

| atom | x-value  | y-value  | z-value  |
|------|----------|----------|----------|
| F    | -0.83853 | -0.92711 | 2.15017  |
| C    | -1.47850 | -0.38445 | 1.13001  |
| C    | -2.86639 | -0.25056 | 1.13498  |
| C    | -3.51601 | 0.32442  | 0.04013  |
| F    | -4.82402 | 0.44522  | 0.05571  |
| C    | -2.79799 | 0.77437  | -1.07036 |
| F    | -3.42329 | 1.31748  | -2.09481 |
| C    | -1.40942 | 0.65121  | -1.09856 |
| F    | -0.70510 | 1.06484  | -2.13671 |
| C    | -0.80565 | 0.07557  | 0.00865  |
| F    | -3.55639 | -0.66759 | 2.17680  |
| Xe   | 1.32976  | -0.12397 | -0.01807 |

Vibrational analysis:

| [C <sub>6</sub> F <sub>5</sub> Xe] <sup>+</sup> |             |                     |              |           |           |           |           |
|-------------------------------------------------|-------------|---------------------|--------------|-----------|-----------|-----------|-----------|
| Mode                                            | freq (cm-1) | eps<br>(L/(mol*cm)) | Int (km/mol) | T2 (a.u.) | TX (a.u.) | TY (a.u.) | TZ (a.u.) |
| 6                                               | 72.42       | 0.000046            | 0.23         | 0.000199  | 0.001902  | 0.012647  | 0.005988  |
| 7                                               | 120.10      | 0.000018            | 0.09         | 0.000046  | -0.000222 | -0.002803 | 0.006191  |
| 8                                               | 127.95      | 0.000000            | 0.00         | 0.000000  | -0.000005 | -0.000610 | -0.000280 |
| 9                                               | 152.95      | 0.000000            | 0.00         | 0.000000  | -0.000129 | 0.000303  | 0.000092  |
| 10                                              | 176.37      | 0.000131            | 0.66         | 0.000232  | 0.000677  | 0.013718  | 0.006576  |
| 11                                              | 182.49      | 0.000015            | 0.08         | 0.000026  | 0.005029  | -0.000810 | -0.000240 |
| 12                                              | 270.25      | 0.000713            | 3.60         | 0.000823  | -0.003561 | -0.025745 | -0.012160 |
| 13                                              | 275.64      | 0.000018            | 0.09         | 0.000021  | -0.000036 | 0.001315  | -0.004334 |
| 14                                              | 277.28      | 0.000001            | 0.01         | 0.000001  | -0.000019 | 0.001190  | 0.000282  |
| 15                                              | 288.02      | 0.000000            | 0.00         | 0.000000  | 0.000080  | 0.000069  | 0.000009  |
| 16                                              | 306.20      | 0.000179            | 0.90         | 0.000182  | 0.000828  | 0.005697  | -0.012201 |
| 17                                              | 346.05      | 0.000906            | 4.58         | 0.000817  | 0.028448  | -0.002762 | -0.000146 |
| 18                                              | 432.90      | 0.000000            | 0.00         | 0.000000  | 0.000038  | 0.000218  | -0.000516 |
| 19                                              | 489.65      | 0.001770            | 8.94         | 0.001128  | -0.033443 | 0.003037  | 0.000348  |
| 20                                              | 543.48      | 0.000113            | 0.57         | 0.000065  | -0.001089 | -0.007206 | -0.003426 |
| 21                                              | 588.72      | 0.000598            | 3.02         | 0.000317  | -0.017726 | 0.001650  | 0.000290  |
| 22                                              | 637.92      | 0.000000            | 0.00         | 0.000000  | 0.000013  | 0.000043  | -0.000163 |
| 23                                              | 658.19      | 0.000000            | 0.00         | 0.000000  | -0.000102 | 0.000242  | 0.000073  |
| 24                                              | 753.92      | 0.022956            | 116.01       | 0.009502  | -0.097050 | 0.009036  | 0.001254  |
| 25                                              | 758.92      | 0.000029            | 0.15         | 0.000012  | 0.002683  | -0.001126 | 0.001843  |
| 26                                              | 1019.27     | 0.029356            | 148.35       | 0.008988  | -0.002690 | -0.039925 | 0.085945  |
| 27                                              | 1105.48     | 0.013095            | 66.18        | 0.003697  | 0.060532  | -0.005668 | -0.000606 |
| 28                                              | 1196.28     | 0.000140            | 0.71         | 0.000037  | -0.000242 | -0.002536 | 0.005487  |
| 29                                              | 1309.08     | 0.001702            | 8.60         | 0.000406  | 0.020069  | -0.001651 | -0.000451 |
| 30                                              | 1334.99     | 0.007884            | 39.84        | 0.001843  | 0.001169  | 0.018072  | -0.038923 |
| 31                                              | 1447.85     | 0.000485            | 2.45         | 0.000105  | 0.010167  | -0.001029 | -0.000358 |
| 32                                              | 1534.69     | 0.056068            | 283.35       | 0.011401  | 0.106341  | -0.009147 | -0.002964 |
| 33                                              | 1542.96     | 0.086282            | 436.04       | 0.017451  | -0.002195 | -0.055783 | 0.119724  |
| 34                                              | 1604.12     | 0.002604            | 13.16        | 0.000507  | -0.022408 | 0.002126  | 0.000107  |
| 35                                              | 1659.49     | 0.000963            | 4.86         | 0.000181  | 0.000430  | 0.005670  | -0.012193 |

### 9.48. $[\text{C}_6\text{F}_5\text{Xe}(\text{H}_2\text{O})]^+$

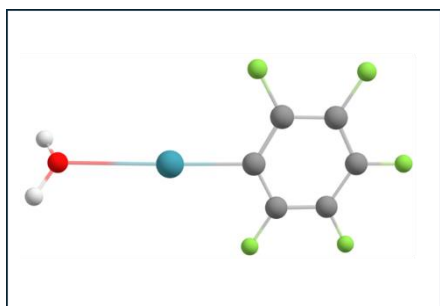

Total enthalpy: -1157.33100193 Eh

Total entropy: 0.05612451 Eh

Final Gibbs free energy: -1157.38712644 Eh

Cartesian coordinates in Ångström:

| $[\text{C}_6\text{F}_5\text{Xe}(\text{H}_2\text{O})]^+$ |          |          |          |
|---------------------------------------------------------|----------|----------|----------|
| atom                                                    | x-value  | y-value  | z-value  |
| F                                                       | -0.89490 | -0.98000 | 2.17680  |
| C                                                       | -1.49242 | -0.41487 | 1.13895  |
| C                                                       | -2.87058 | -0.23472 | 1.13109  |
| C                                                       | -3.48488 | 0.36068  | 0.03372  |
| F                                                       | -4.79830 | 0.52895  | 0.03145  |
| C                                                       | -2.73712 | 0.77883  | -1.06289 |
| F                                                       | -3.33703 | 1.34359  | -2.10274 |
| C                                                       | -1.35791 | 0.60410  | -1.06884 |
| F                                                       | -0.63639 | 0.99795  | -2.10687 |
| C                                                       | -0.77058 | 0.00964  | 0.03565  |
| F                                                       | -3.59571 | -0.63140 | 2.16875  |
| Xe                                                      | 1.33124  | -0.25274 | 0.05084  |
| F                                                       | 4.00666  | -0.66715 | 0.15014  |
| H                                                       | 4.55954  | 0.01323  | -0.17354 |

### 9.49. $[\text{C}_6\text{F}_5\text{Xe}(\text{HF})]^+$

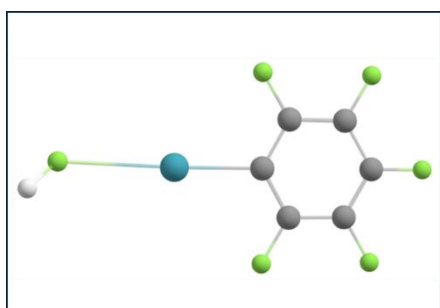

Total enthalpy: -1133.21881605 Eh

Total entropy: 0.05778754 Eh

Final Gibbs free energy: -1133.27660359 Eh

Cartesian coordinates in Ångström:

$[\text{C}_6\text{F}_5\text{Xe}(\text{HF})]^+$

| atom | x-value  | y-value  | z-value  |
|------|----------|----------|----------|
| F    | -0.89156 | -0.90368 | 2.19790  |
| C    | -1.50798 | -0.37182 | 1.15133  |
| C    | -2.89192 | -0.22257 | 1.14098  |
| C    | -3.51915 | 0.34037  | 0.02833  |
| F    | -4.82786 | 0.47989  | 0.02285  |
| C    | -2.77812 | 0.75722  | -1.07864 |
| F    | -3.38351 | 1.28768  | -2.12451 |
| C    | -1.39365 | 0.61160  | -1.07741 |
| F    | -0.67052 | 1.00087  | -2.11809 |
| C    | -0.79476 | 0.04945  | 0.03957  |
| F    | -3.60411 | -0.61271 | 2.18141  |
| Xe   | 1.32917  | -0.17786 | 0.04778  |
| O    | 3.98385  | -0.51550 | -0.04629 |
| H    | 4.59079  | 0.22688  | -0.15945 |
| H    | 4.44174  | -1.13652 | 0.53421  |

### 9.50. C<sub>6</sub>F<sub>5</sub>Xe-F-Al(OR<sup>F</sup>)<sub>3</sub>

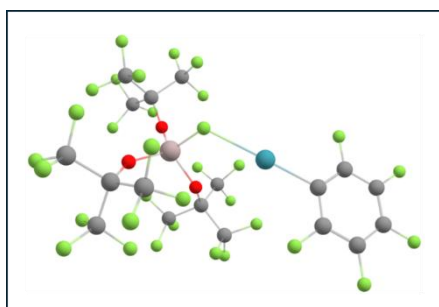

Total enthalpy: -4778.07999955 Eh

Total entropy: 0.13903510 Eh

Final Gibbs free energy: -4778.21903465 Eh

Cartesian coordinates in Ångström:

| C <sub>6</sub> F <sub>5</sub> Xe-F-Al(OR <sup>F</sup> ) <sub>3</sub> |          |          |          |
|----------------------------------------------------------------------|----------|----------|----------|
| atom                                                                 | x-value  | y-value  | z-value  |
| F                                                                    | -3.30672 | 1.90051  | 3.03954  |
| C                                                                    | -3.14413 | 1.07079  | 2.01828  |
| C                                                                    | -4.18360 | 0.85428  | 1.11920  |
| C                                                                    | -3.98071 | -0.00943 | 0.05427  |
| C                                                                    | -2.78082 | -0.67647 | -0.13121 |
| C                                                                    | -1.74181 | -0.45875 | 0.76794  |
| F                                                                    | -0.57912 | -1.07700 | 0.60807  |
| C                                                                    | -1.92971 | 0.41158  | 1.83962  |
| F                                                                    | -0.94162 | 0.61719  | 2.69626  |
| Xe                                                                   | -5.60956 | -0.40069 | -1.25706 |
| F                                                                    | -5.34497 | 1.47299  | 1.28634  |
| F                                                                    | -7.49569 | -0.89068 | -2.71479 |
| F                                                                    | -8.92576 | 1.95594  | -3.19075 |
| F                                                                    | -6.34775 | -1.58152 | 1.75809  |

|    |           |          |          |
|----|-----------|----------|----------|
| F  | -7.28765  | -3.48383 | -4.73312 |
| F  | -8.52845  | 1.31877  | -1.15630 |
| F  | -6.50554  | -3.52250 | -0.16221 |
| F  | -9.34267  | -1.73387 | -4.84624 |
| C  | -9.49391  | 1.80299  | -1.98222 |
| Al | -8.93313  | -1.55459 | -1.97584 |
| F  | -7.40055  | -4.96385 | -3.15656 |
| C  | -7.70252  | -1.59433 | 1.94791  |
| O  | -9.23374  | -3.14228 | -2.57511 |
| F  | -7.22647  | -4.32485 | 1.72889  |
| F  | -9.84341  | 3.01237  | -1.52392 |
| F  | -11.03319 | 0.75537  | -4.41572 |
| C  | -8.06988  | -4.44701 | -4.19789 |
| F  | -8.09933  | -0.31779 | 1.93492  |
| F  | -7.93271  | -2.10329 | 3.16371  |
| C  | -7.61758  | -3.75769 | 0.57393  |
| O  | -10.26161 | -0.47896 | -2.20603 |
| C  | -10.01323 | -2.90694 | -4.84942 |
| C  | -9.43616  | -3.83492 | -3.72279 |
| C  | -10.69313 | 0.79377  | -2.04723 |
| O  | -8.35169  | -1.64074 | -0.32068 |
| C  | -8.39561  | -2.40606 | 0.79722  |
| F  | -9.90155  | -3.44136 | -6.07569 |
| F  | -8.22680  | -5.41376 | -5.11792 |
| C  | -11.60591 | 1.16020  | -3.27491 |
| F  | -11.82332 | 2.48765  | -3.36501 |
| F  | -8.36404  | -4.63959 | -0.09831 |
| F  | -11.30631 | -2.62895 | -4.62338 |
| F  | -10.70802 | 0.93013  | 0.34843  |
| C  | -11.53111 | 0.90283  | -0.72088 |
| F  | -12.79645 | 0.54727  | -3.17219 |
| C  | -10.45611 | -4.99211 | -3.42724 |
| C  | -9.87723  | -2.72571 | 1.21355  |
| F  | -9.86152  | -5.97997 | -2.73262 |
| F  | -9.94910  | -3.75916 | 2.07042  |
| F  | -11.47673 | -4.53570 | -2.69179 |
| F  | -10.44955 | -1.65983 | 1.79705  |
| F  | -12.29148 | 2.01250  | -0.68561 |
| F  | -12.33070 | -0.16027 | -0.58828 |
| F  | -10.95538 | -5.52282 | -4.56021 |
| F  | -10.59437 | -3.02779 | 0.12000  |
| F  | -2.61387  | -1.51470 | -1.14861 |

Vibrational analysis:

| C <sub>6</sub> F <sub>5</sub> Xe-F-Al(OR <sup>F</sup> ) <sub>3</sub> |             |                     |              |           |           |           |           |
|----------------------------------------------------------------------|-------------|---------------------|--------------|-----------|-----------|-----------|-----------|
| Mode                                                                 | freq (cm-1) | eps<br>(L/(mol*cm)) | Int (km/mol) | T2 (a.u.) | TX (a.u.) | TY (a.u.) | TZ (a.u.) |
| 6                                                                    | 6.15        | 0.000017            | 0.08         | 0.000849  | 0.006221  | 0.026974  | 0.009114  |
| 7                                                                    | 9.96        | 0.000008            | 0.04         | 0.000248  | 0.013434  | 0.000410  | 0.008182  |
| 8                                                                    | 10.85       | 0.000000            | 0.00         | 0.000008  | -0.002314 | 0.001465  | 0.000394  |
| 9                                                                    | 14.78       | 0.000009            | 0.05         | 0.000196  | 0.002873  | -0.009722 | -0.009666 |
| 10                                                                   | 16.82       | 0.000006            | 0.03         | 0.000112  | 0.008045  | 0.001097  | 0.006762  |
| 11                                                                   | 21.68       | 0.000015            | 0.08         | 0.000222  | 0.002380  | -0.003162 | 0.014376  |
| 12                                                                   | 22.80       | 0.000052            | 0.26         | 0.000712  | -0.011980 | -0.009088 | -0.022040 |
| 13                                                                   | 28.00       | 0.000027            | 0.14         | 0.000303  | -0.011128 | -0.002277 | -0.013173 |
| 14                                                                   | 30.72       | 0.000097            | 0.49         | 0.000988  | -0.022368 | 0.022026  | 0.001504  |
| 15                                                                   | 39.53       | 0.000038            | 0.19         | 0.000300  | 0.002075  | -0.012529 | 0.011762  |
| 16                                                                   | 39.99       | 0.000116            | 0.59         | 0.000904  | 0.016503  | -0.019870 | -0.015393 |
| 17                                                                   | 50.12       | 0.000188            | 0.95         | 0.001170  | 0.002531  | 0.014695  | -0.030781 |

|    |        |          |       |          |           |           |           |
|----|--------|----------|-------|----------|-----------|-----------|-----------|
| 18 | 54.50  | 0.000095 | 0.48  | 0.000546 | 0.015019  | 0.011974  | -0.013297 |
| 19 | 61.88  | 0.000967 | 4.89  | 0.004878 | -0.061607 | -0.029019 | -0.015519 |
| 20 | 64.61  | 0.000030 | 0.15  | 0.000144 | -0.010544 | -0.005434 | -0.001758 |
| 21 | 66.54  | 0.000204 | 1.03  | 0.000955 | -0.027281 | -0.000459 | 0.014501  |
| 22 | 72.22  | 0.000166 | 0.84  | 0.000719 | -0.026623 | -0.002116 | 0.002352  |
| 23 | 73.80  | 0.000019 | 0.10  | 0.000082 | -0.007998 | 0.003540  | -0.002405 |
| 24 | 77.69  | 0.000089 | 0.45  | 0.000357 | 0.002664  | -0.017233 | 0.007289  |
| 25 | 81.43  | 0.000032 | 0.16  | 0.000123 | 0.008859  | -0.005232 | 0.004082  |
| 26 | 86.99  | 0.000026 | 0.13  | 0.000092 | -0.004140 | -0.006694 | -0.005453 |
| 27 | 89.49  | 0.000067 | 0.34  | 0.000233 | 0.011240  | 0.001791  | 0.010155  |
| 28 | 91.45  | 0.000004 | 0.02  | 0.000012 | -0.000020 | -0.003468 | -0.000086 |
| 29 | 93.82  | 0.000051 | 0.26  | 0.000171 | -0.008130 | -0.009731 | 0.003238  |
| 30 | 95.80  | 0.000181 | 0.92  | 0.000590 | -0.011587 | -0.014970 | -0.015233 |
| 31 | 98.97  | 0.000737 | 3.72  | 0.002324 | -0.038264 | -0.022127 | 0.019234  |
| 32 | 99.59  | 0.000109 | 0.55  | 0.000341 | 0.003143  | -0.017577 | -0.004745 |
| 33 | 107.61 | 0.000036 | 0.18  | 0.000106 | -0.000519 | 0.002122  | 0.010040  |
| 34 | 130.19 | 0.000021 | 0.11  | 0.000050 | -0.004702 | -0.004704 | 0.002446  |
| 35 | 132.01 | 0.000117 | 0.59  | 0.000278 | -0.010882 | -0.012151 | 0.003397  |
| 36 | 154.82 | 0.000227 | 1.15  | 0.000457 | 0.017748  | -0.011896 | -0.000639 |
| 37 | 158.52 | 0.000050 | 0.25  | 0.000099 | -0.000464 | 0.009395  | -0.003294 |
| 38 | 162.69 | 0.000064 | 0.33  | 0.000124 | -0.009546 | -0.002728 | 0.004994  |
| 39 | 165.86 | 0.000033 | 0.16  | 0.000061 | -0.001541 | 0.005577  | 0.005262  |
| 40 | 167.17 | 0.000123 | 0.62  | 0.000230 | -0.003831 | -0.000785 | 0.014636  |
| 41 | 168.33 | 0.000165 | 0.84  | 0.000306 | 0.000479  | 0.014582  | 0.009670  |
| 42 | 173.52 | 0.000036 | 0.18  | 0.000065 | 0.003471  | 0.003579  | -0.006336 |
| 43 | 182.74 | 0.000382 | 1.93  | 0.000652 | 0.004914  | -0.024969 | 0.001986  |
| 44 | 186.74 | 0.000371 | 1.88  | 0.000620 | -0.001563 | 0.005823  | -0.024163 |
| 45 | 188.70 | 0.002003 | 10.12 | 0.003312 | -0.054534 | -0.016339 | -0.008437 |
| 46 | 201.31 | 0.000661 | 3.34  | 0.001024 | -0.009325 | 0.027816  | -0.012788 |
| 47 | 203.00 | 0.001222 | 6.18  | 0.001879 | 0.019295  | -0.035572 | -0.015533 |
| 48 | 213.87 | 0.000012 | 0.06  | 0.000018 | -0.002539 | -0.003129 | 0.001264  |
| 49 | 248.23 | 0.000023 | 0.11  | 0.000028 | 0.001226  | 0.000444  | 0.005169  |
| 50 | 271.19 | 0.004771 | 24.11 | 0.005490 | -0.063520 | -0.029296 | -0.024426 |
| 51 | 277.26 | 0.000766 | 3.87  | 0.000862 | 0.027619  | 0.005812  | 0.008074  |
| 52 | 278.10 | 0.001444 | 7.30  | 0.001621 | 0.035901  | 0.010203  | 0.015090  |
| 53 | 278.89 | 0.001337 | 6.76  | 0.001497 | 0.035239  | 0.008338  | 0.013610  |
| 54 | 281.56 | 0.002890 | 14.61 | 0.003203 | 0.051087  | 0.022767  | 0.008671  |
| 55 | 282.86 | 0.000308 | 1.55  | 0.000339 | 0.016321  | -0.006773 | -0.005201 |
| 56 | 286.11 | 0.000554 | 2.80  | 0.000604 | -0.022172 | 0.010612  | 0.000226  |
| 57 | 286.99 | 0.000111 | 0.56  | 0.000120 | -0.001003 | -0.003779 | -0.010243 |
| 58 | 287.69 | 0.000352 | 1.78  | 0.000382 | -0.012785 | -0.005567 | -0.013708 |
| 59 | 289.32 | 0.000313 | 1.58  | 0.000338 | 0.016717  | -0.004984 | 0.005805  |
| 60 | 292.76 | 0.000337 | 1.70  | 0.000359 | -0.008421 | -0.007443 | -0.015246 |
| 61 | 303.56 | 0.004042 | 20.43 | 0.004155 | -0.048100 | -0.009661 | -0.041814 |
| 62 | 309.49 | 0.000252 | 1.27  | 0.000254 | 0.007803  | -0.010401 | -0.009199 |
| 63 | 311.76 | 0.001313 | 6.64  | 0.001315 | 0.008842  | -0.034584 | -0.006352 |
| 64 | 313.61 | 0.003858 | 19.50 | 0.003839 | -0.036121 | -0.011512 | -0.049010 |
| 65 | 317.26 | 0.000102 | 0.51  | 0.000100 | -0.007620 | 0.001828  | -0.006230 |
| 66 | 321.56 | 0.000613 | 3.10  | 0.000595 | -0.018195 | -0.013502 | -0.009009 |
| 67 | 323.35 | 0.000358 | 1.81  | 0.000346 | -0.001025 | 0.010028  | -0.015624 |
| 68 | 324.98 | 0.000948 | 4.79  | 0.000910 | -0.013015 | -0.013436 | -0.023665 |
| 69 | 326.93 | 0.000314 | 1.59  | 0.000300 | -0.012868 | 0.009261  | -0.006965 |
| 70 | 328.27 | 0.000277 | 1.40  | 0.000264 | -0.011779 | 0.008907  | 0.006741  |
| 71 | 330.20 | 0.001802 | 9.11  | 0.001703 | 0.028421  | -0.003876 | 0.029675  |
| 72 | 333.85 | 0.000624 | 3.16  | 0.000584 | -0.013510 | -0.005624 | -0.019222 |
| 73 | 350.55 | 0.000053 | 0.27  | 0.000048 | -0.006011 | -0.002746 | 0.001969  |
| 74 | 354.82 | 0.000006 | 0.03  | 0.000005 | 0.000749  | 0.002136  | 0.000066  |
| 75 | 355.75 | 0.000227 | 1.15  | 0.000199 | -0.002595 | -0.011349 | 0.007972  |
| 76 | 364.50 | 0.000283 | 1.43  | 0.000242 | 0.005920  | -0.012757 | 0.006673  |
| 77 | 367.07 | 0.001837 | 9.28  | 0.001562 | 0.018951  | 0.028182  | 0.020205  |
| 78 | 374.31 | 0.006288 | 31.78 | 0.005243 | -0.041334 | 0.035114  | -0.047969 |
| 79 | 385.47 | 0.007751 | 39.17 | 0.006275 | -0.015779 | 0.035519  | 0.069022  |
| 80 | 423.21 | 0.001576 | 7.97  | 0.001162 | 0.008281  | 0.010937  | 0.031209  |
| 81 | 441.30 | 0.000003 | 0.01  | 0.000002 | -0.000403 | -0.001113 | -0.000678 |
| 82 | 458.53 | 0.011573 | 58.48 | 0.007876 | 0.054253  | -0.050164 | 0.049155  |

|     |         |          |        |          |           |           |           |
|-----|---------|----------|--------|----------|-----------|-----------|-----------|
| 83  | 463.64  | 0.008673 | 43.83  | 0.005838 | -0.018103 | -0.049675 | -0.055158 |
| 84  | 494.36  | 0.000012 | 0.06   | 0.000008 | -0.002178 | 0.000124  | -0.001752 |
| 85  | 523.06  | 0.001105 | 5.58   | 0.000659 | -0.014476 | -0.017960 | -0.011267 |
| 86  | 524.28  | 0.000428 | 2.16   | 0.000254 | 0.006047  | -0.009909 | -0.010941 |
| 87  | 525.61  | 0.000929 | 4.69   | 0.000551 | 0.013255  | -0.018771 | 0.004827  |
| 88  | 526.03  | 0.000518 | 2.62   | 0.000307 | -0.007021 | -0.000373 | 0.016062  |
| 89  | 526.69  | 0.000178 | 0.90   | 0.000105 | 0.005427  | -0.007496 | 0.004437  |
| 90  | 526.92  | 0.001736 | 8.77   | 0.001028 | 0.030105  | 0.010902  | 0.001743  |
| 91  | 527.07  | 0.000293 | 1.48   | 0.000174 | 0.004044  | -0.001670 | 0.012427  |
| 92  | 531.11  | 0.000484 | 2.45   | 0.000285 | -0.008865 | 0.011364  | -0.008766 |
| 93  | 531.46  | 0.000192 | 0.97   | 0.000113 | 0.000287  | -0.002503 | -0.010324 |
| 94  | 535.40  | 0.000700 | 3.54   | 0.000408 | 0.017268  | 0.004586  | 0.009414  |
| 95  | 556.72  | 0.002024 | 10.23  | 0.001135 | -0.008162 | -0.003676 | -0.032473 |
| 96  | 560.52  | 0.001037 | 5.24   | 0.000577 | 0.009695  | -0.021949 | -0.001156 |
| 97  | 561.91  | 0.000025 | 0.13   | 0.000014 | 0.000909  | -0.002444 | 0.002689  |
| 98  | 562.81  | 0.000078 | 0.39   | 0.000043 | -0.006145 | 0.000798  | 0.002216  |
| 99  | 562.92  | 0.000089 | 0.45   | 0.000049 | -0.006940 | -0.000136 | 0.000997  |
| 100 | 563.97  | 0.000108 | 0.55   | 0.000060 | -0.003085 | -0.003276 | -0.006289 |
| 101 | 570.02  | 0.003888 | 19.65  | 0.002129 | -0.019350 | -0.001368 | -0.041860 |
| 102 | 574.79  | 0.005785 | 29.23  | 0.003141 | 0.028144  | -0.048439 | -0.001504 |
| 103 | 579.38  | 0.000430 | 2.17   | 0.000232 | -0.000910 | -0.008110 | 0.012850  |
| 104 | 588.96  | 0.001025 | 5.18   | 0.000543 | -0.019430 | -0.006294 | -0.011230 |
| 105 | 629.82  | 0.041486 | 209.65 | 0.020555 | -0.133182 | -0.052448 | -0.008196 |
| 106 | 646.03  | 0.000018 | 0.09   | 0.000009 | -0.002774 | -0.000897 | 0.000172  |
| 107 | 649.02  | 0.000003 | 0.02   | 0.000002 | 0.000797  | -0.000822 | 0.000573  |
| 108 | 714.80  | 0.003400 | 17.18  | 0.001484 | -0.004467 | 0.031484  | 0.021753  |
| 109 | 716.78  | 0.002613 | 13.20  | 0.001137 | 0.015964  | 0.024526  | -0.016766 |
| 110 | 717.05  | 0.005648 | 28.54  | 0.002458 | 0.037541  | -0.029124 | -0.014161 |
| 111 | 718.54  | 0.002185 | 11.04  | 0.000949 | 0.007085  | 0.028847  | 0.008165  |
| 112 | 719.13  | 0.013125 | 66.33  | 0.005695 | 0.062363  | -0.003597 | 0.042346  |
| 113 | 719.68  | 0.010345 | 52.28  | 0.004486 | 0.044660  | 0.029603  | -0.040185 |
| 114 | 737.07  | 0.000570 | 2.88   | 0.000241 | 0.009659  | 0.002153  | 0.011976  |
| 115 | 745.57  | 0.001852 | 9.36   | 0.000775 | -0.022790 | -0.014790 | -0.006069 |
| 116 | 747.78  | 0.000219 | 1.11   | 0.000091 | -0.001231 | -0.009213 | 0.002247  |
| 117 | 760.72  | 0.000017 | 0.09   | 0.000007 | -0.002592 | -0.000283 | 0.000517  |
| 118 | 786.39  | 0.011622 | 58.73  | 0.004612 | -0.054732 | -0.012458 | -0.038225 |
| 119 | 799.35  | 0.001316 | 6.65   | 0.000514 | -0.015595 | -0.006999 | 0.014884  |
| 120 | 843.11  | 0.007883 | 39.84  | 0.002918 | -0.039075 | -0.022431 | -0.029794 |
| 121 | 868.93  | 0.005344 | 27.01  | 0.001919 | -0.019709 | 0.038840  | -0.004714 |
| 122 | 953.83  | 0.015654 | 79.11  | 0.005122 | 0.070268  | -0.013007 | 0.003839  |
| 123 | 958.22  | 0.005346 | 27.02  | 0.001741 | 0.034152  | 0.002813  | 0.023804  |
| 124 | 962.55  | 0.015709 | 79.39  | 0.005093 | 0.060559  | 0.033435  | 0.017543  |
| 125 | 964.73  | 0.050661 | 256.02 | 0.016387 | -0.084713 | -0.028598 | -0.091615 |
| 126 | 965.10  | 0.053841 | 272.09 | 0.017409 | 0.119209  | -0.047990 | -0.029926 |
| 127 | 968.51  | 0.053364 | 269.68 | 0.017195 | 0.052394  | 0.100609  | -0.065782 |
| 128 | 1009.87 | 0.032103 | 162.24 | 0.009920 | 0.056893  | -0.063461 | -0.051538 |
| 129 | 1071.14 | 0.001628 | 8.23   | 0.000474 | 0.017850  | -0.011475 | -0.004897 |
| 130 | 1082.18 | 0.001866 | 9.43   | 0.000538 | -0.008148 | 0.013183  | -0.017261 |
| 131 | 1088.29 | 0.000801 | 4.05   | 0.000230 | -0.001761 | -0.001166 | 0.015012  |
| 132 | 1101.72 | 0.025206 | 127.38 | 0.007140 | 0.064679  | 0.015340  | 0.052163  |
| 133 | 1125.25 | 0.007795 | 39.39  | 0.002162 | -0.045915 | 0.001611  | 0.007141  |
| 134 | 1130.46 | 0.003595 | 18.17  | 0.000993 | 0.011178  | 0.006289  | 0.028775  |
| 135 | 1137.42 | 0.004782 | 24.16  | 0.001312 | -0.000607 | -0.024131 | 0.027004  |
| 136 | 1145.23 | 0.003885 | 19.63  | 0.001059 | 0.020073  | -0.022138 | 0.012867  |
| 137 | 1146.13 | 0.004924 | 24.88  | 0.001341 | 0.032115  | -0.006870 | -0.016192 |
| 138 | 1154.82 | 0.012182 | 61.56  | 0.003292 | 0.031426  | 0.002097  | 0.047957  |
| 139 | 1169.29 | 0.005433 | 27.46  | 0.001450 | 0.025638  | -0.026315 | -0.010011 |
| 140 | 1173.66 | 0.012586 | 63.60  | 0.003346 | -0.029797 | 0.030956  | -0.038733 |
| 141 | 1178.89 | 0.004533 | 22.91  | 0.001200 | -0.012162 | -0.032199 | 0.003905  |
| 142 | 1179.88 | 0.004007 | 20.25  | 0.001060 | -0.005753 | 0.032043  | 0.000180  |
| 143 | 1187.13 | 0.009193 | 46.46  | 0.002416 | -0.043059 | -0.023322 | 0.004301  |
| 144 | 1188.88 | 0.004353 | 22.00  | 0.001143 | -0.032822 | -0.004171 | -0.006925 |
| 145 | 1192.91 | 0.011196 | 56.58  | 0.002929 | -0.016691 | -0.033602 | 0.039004  |
| 146 | 1211.00 | 0.007999 | 40.42  | 0.002061 | -0.014481 | 0.042797  | 0.004460  |
| 147 | 1213.45 | 0.001758 | 8.88   | 0.000452 | -0.002418 | -0.015291 | -0.014573 |

|     |         |          |         |          |           |           |           |
|-----|---------|----------|---------|----------|-----------|-----------|-----------|
| 148 | 1218.39 | 0.039299 | 198.60  | 0.010066 | 0.095032  | -0.021465 | 0.023956  |
| 149 | 1225.75 | 0.174831 | 883.52  | 0.044510 | 0.025904  | -0.160104 | 0.134929  |
| 150 | 1226.53 | 0.240693 | 1216.36 | 0.061239 | 0.039196  | -0.185992 | -0.158460 |
| 151 | 1235.48 | 0.084412 | 426.59  | 0.021321 | -0.063054 | 0.012327  | -0.131124 |
| 152 | 1238.96 | 0.077987 | 394.12  | 0.019643 | 0.075532  | -0.086209 | 0.080660  |
| 153 | 1245.11 | 0.067059 | 338.89  | 0.016807 | -0.040517 | 0.062703  | 0.105989  |
| 154 | 1248.78 | 0.066981 | 338.49  | 0.016738 | 0.055781  | 0.008214  | 0.116444  |
| 155 | 1252.30 | 0.078141 | 394.89  | 0.019472 | -0.033866 | -0.134249 | 0.017392  |
| 156 | 1255.55 | 0.177628 | 897.66  | 0.044149 | 0.199773  | 0.029077  | -0.058262 |
| 157 | 1260.18 | 0.054860 | 277.24  | 0.013585 | -0.052067 | -0.093964 | -0.045223 |
| 158 | 1300.26 | 0.000011 | 0.05    | 0.000003 | -0.000463 | 0.000962  | -0.001175 |
| 159 | 1327.07 | 0.013402 | 67.73   | 0.003151 | -0.013484 | 0.027545  | -0.047020 |
| 160 | 1335.30 | 0.029238 | 147.75  | 0.006833 | 0.010436  | -0.071582 | -0.040001 |
| 161 | 1343.83 | 0.010085 | 50.97   | 0.002342 | 0.041730  | -0.018122 | 0.016498  |
| 162 | 1347.01 | 0.003405 | 17.21   | 0.000789 | -0.016359 | 0.018164  | 0.013835  |
| 163 | 1435.55 | 0.002784 | 14.07   | 0.000605 | 0.021019  | 0.005251  | 0.011653  |
| 164 | 1526.59 | 0.060694 | 306.72  | 0.012407 | 0.096175  | 0.006756  | 0.055783  |
| 165 | 1530.48 | 0.077651 | 392.42  | 0.015833 | 0.062194  | -0.080354 | -0.074217 |
| 166 | 1628.12 | 0.002072 | 10.47   | 0.000397 | -0.014190 | -0.002077 | -0.013839 |
| 167 | 1652.89 | 0.000080 | 0.40    | 0.000015 | 0.003827  | -0.000292 | -0.000532 |

### 9.51. $[F(Al(OR^F)_3)_2]^-$

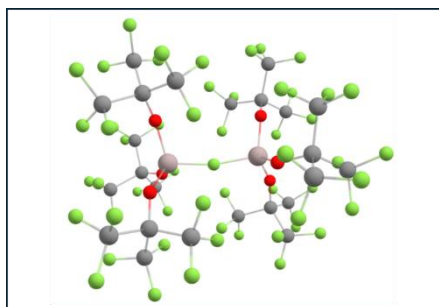

Total enthalpy: -7342.32859654 Eh

Total entropy: 0.19315274 Eh

Final Gibbs free energy: -7342.52174928 Eh

Cartesian coordinates in Ångström:

| $[F(Al(OR^F)_3)_2]^-$ |          |          |          |
|-----------------------|----------|----------|----------|
| atom                  | x-value  | y-value  | z-value  |
| Al                    | 0.11980  | 0.27533  | 0.04595  |
| O                     | -1.37673 | 0.92675  | -0.50660 |
| O                     | 0.33888  | 0.06918  | 1.75175  |
| O                     | 0.50143  | -1.18459 | -0.79921 |
| C                     | -2.24052 | 1.96397  | -0.59868 |
| C                     | 0.03496  | -0.77599 | 2.76775  |
| C                     | 0.27010  | -1.86846 | -1.94748 |
| F                     | 1.42942  | 1.45255  | -0.30447 |
| C                     | 0.96167  | -3.27502 | -1.82270 |
| C                     | 0.88060  | -1.09407 | -3.16673 |
| C                     | -1.26954 | -2.08730 | -2.19434 |
| F                     | 2.16971  | -3.16229 | -1.26512 |
| F                     | 1.11083  | -3.87254 | -3.02436 |
| F                     | 0.22705  | -4.09450 | -1.04447 |

|   |          |          |          |
|---|----------|----------|----------|
| F | -1.89467 | -2.32421 | -1.03294 |
| F | -1.51088 | -3.12809 | -3.01946 |
| F | -1.82959 | -0.99794 | -2.74851 |
| F | 2.21688  | -1.21169 | -3.18032 |
| F | 0.58854  | 0.21569  | -3.05982 |
| F | 0.41008  | -1.53222 | -4.35013 |
| C | 0.70651  | -2.18389 | 2.54950  |
| C | -1.51931 | -0.97130 | 2.89285  |
| C | 0.57960  | -0.14506 | 4.09811  |
| F | 1.91709  | -0.26722 | 4.16493  |
| F | 0.05447  | -0.73924 | 5.19185  |
| F | 0.28121  | 1.15857  | 4.15861  |
| F | -2.05735 | -1.11961 | 1.66856  |
| F | -2.09851 | 0.09978  | 3.46221  |
| F | -1.84844 | -2.05291 | 3.62570  |
| F | -0.00509 | -2.91384 | 1.66936  |
| F | 0.79322  | -2.89431 | 3.69379  |
| F | 1.94099  | -2.04019 | 2.05624  |
| C | -3.53515 | 1.48237  | -1.34946 |
| C | -1.57766 | 3.12943  | -1.41097 |
| C | -2.64970 | 2.47961  | 0.82902  |
| F | -0.94393 | 2.63553  | -2.48041 |
| F | -0.66290 | 3.75559  | -0.64417 |
| F | -2.46744 | 4.04704  | -1.83401 |
| F | -3.32316 | 1.39758  | -2.67473 |
| F | -4.56626 | 2.33453  | -1.15780 |
| F | -3.91034 | 0.27296  | -0.91604 |
| F | -3.55534 | 1.65717  | 1.39134  |
| F | -3.17894 | 3.71802  | 0.80031  |
| F | -1.57500 | 2.50609  | 1.63074  |
| F | 6.61814  | -1.36395 | -1.31061 |
| F | 5.67872  | -0.94750 | 1.27589  |

---

## 10. References

- 1 I. Krossing, *Chem. Eur. J.*, 2001, **7**, 490–502.
- 2 A. Martens, P. Weis, M. C. Krummer, M. Kreuzer, A. Meierhöfer, S. C. Meier, J. Bohnenberger, H. Scherer, I. Riddlestone and I. Krossing, *Chem. Sci.*, 2018, **9**, 7058–7068.
- 3 J. Cosier and A. M. Glazer, *J. Appl. Crystallogr.*, 1986, **19**, 105–107.
- 4 Bruker, *SAINT, V8.40B*, Bruker AXS Inc., Madison, Wisconsin, USA.
- 5 L. Krause, R. Herbst-Irmer, G. M. Sheldrick and D. Stalke, *J. Appl. Crystallogr.*, 2015, **48**, 3–10.
- 6 G. M. Sheldrick, *Acta Crystallogr. C Struct. Chem.*, 2015, **71**, 3–8.
- 7 C. B. Hübschle, G. M. Sheldrick and B. Dittrich, *J. Appl. Crystallogr.*, 2011, **44**, 1281–1284.
- 8 D. Kratzert, J. J. Holstein and I. Krossing, *J. Appl. Crystallogr.*, 2015, **48**, 933–938.
- 9 O. V. Dolomanov, L. J. Bourhis, R. J. Gildea, J. A. K. Howard and H. Puschmann, *J. Appl. Crystallogr.*, 2009, **42**, 339–341.
- 10 C. R. Groom, I. J. Bruno, M. P. Lightfoot and S. C. Ward, *Acta Crystallogr. B Struct. Sci. Cryst. Eng. Mater.*, 2016, **72**, 171–179.
- 11 D. Kratzert, *FinalCif, V139*, 2025, <https://dkratzert.de/finalcif.html>.
- 12 P. R. Spackman, M. J. Turner, J. J. McKinnon, S. K. Wolff, D. J. Grimwood, D. Jayatilaka and M. A. Spackman, *J. Appl. Crystallogr.*, 2021, **54**, 1006–1011.

- 13 R. K. Harris, E. D. Becker, S. M. Cabral De Menezes, R. Goodfellow and P. Granger, *Magn. Reson. Chem.*, 2002, **40**, 489–505.
- 14 K. Herb, R. Tschaggelar, G. Denninger and G. Jeschke, *J. Magn. Reson.*, 2018, **289**, 100–106.
- 15 S. Stoll and A. Schweiger, *J. Magn. Reson.*, 2006, **178**, 42–55.
- 16 F. Neese, *WIREs Comput. Mol. Sci.*, 2022, **12**, e1606.
- 17 S. Grimme, A. Hansen, S. Ehlert and J.-M. Mewes, *J. Chem. Phys.*, 2021, **154**, 064103.
- 18 H. Kruse and S. Grimme, *J. Chem. Phys.*, 2012, **136**, 154101.
- 19 E. Caldeweyher, C. Bannwarth and S. Grimme, *J. Chem. Phys.*, 2017, **147**, 034112.
- 20 E. Caldeweyher, S. Ehlert, A. Hansen, H. Neugebauer, S. Spicher, C. Bannwarth and S. Grimme, *J. Chem. Phys.*, 2019, **150**, 154122.
- 21 W. Grimus, *arXiv*, 2011, preprint, DOI: 10.48550/ARXIV.1112.3748.
- 22 M. A. Tius, *Tetrahedron*, 1995, **51**, 6605–6634.
- 23 M. Sellin, C. Friedmann, M. Mayländer, S. Richert and I. Krossing, *Chem. Sci.*, 2022, **13**, 9147–9158.
- 24 K. M. Marczenko, H. P. A. Mercier, J. T. Goettel and G. J. Schrobilgen, *Angew. Chem. Int. Ed.*, 2025, **64**, e202425216.
- 25 Q. Wen and W. Jäger, *J. Phys. Chem. A*, 2007, **111**, 2093–2097.
- 26 S. Hirabayashi and K. M. T. Yamada, *Chem. Phys. Lett.*, 2006, **418**, 323–327.
